# Supplementary material for: Enantioselective decarboxylative protonation and deuteration of β-ketocarboxylic acids
Source: Royal Society of Chemistry journal article supplement (doi:10.1039/d1cc01610e), 2021-01-01
Supplement: d1cc01610e1.pdf [file d1cc01610e1.pdf]

## **Supplementary Information**

### **Enantioselective Decarboxylative Protonation and Deuteration of $\beta$ -Ketocarboxylic Acids**

Haruna Mizutani, Ryouta Kawanishi and Kazutaka Shibatomi

*Department of Applied Chemistry and Life Science, Toyohashi University of Technology, 1-1  
Hibarigaoka, Tempaku-cho, Toyohashi 441-8580, Japan  
E-mail: shiba@chem.tut.ac.jp.*

## Table of contents

|                                                                            |    |
|----------------------------------------------------------------------------|----|
| 1. General information .....                                               | 2  |
| 2. Synthesis of substrates and catalyst .....                              | 2  |
| 2.1 Synthesis of $\beta$ -ketoesters.....                                  | 2  |
| 2.2 Synthesis of $\beta$ -ketocarboxylic acids.....                        | 5  |
| 2.3 Synthesis of catalyst.....                                             | 7  |
| 3. Screening of amine catalysts.....                                       | 8  |
| 4. General procedure for enantioselective decarboxylative protonation..... | 8  |
| 5. General procedure for enantioselective decarboxylative deuteration..... | 14 |
| 6. References .....                                                        | 19 |
| 7. NMR spectra                                                             |    |

## 1. General information

**Methods:** All non-aqueous reactions were carried out in dried glassware under an argon atmosphere and stirred using magnetic stir-plates. Thin-layer chromatography analyses were performed using pre-coated silica gel plates with a fluorescent indicator (F254) (Merck Millipore, Darmstadt, Germany). Visualization was accomplished by ultraviolet (UV) light (254 nm), phosphomolybdic acid, or *p*-anisaldehyde. Flash column chromatography was performed using silica gel 60 (mesh size 40–100) supplied by Kanto Chemical Co., Inc. (Tokyo, Japan). <sup>1</sup>H and <sup>13</sup>C nuclear magnetic resonance (NMR) spectra were recorded on a JNM-ECS400 (400 MHz <sup>1</sup>H, 100 MHz <sup>13</sup>C) or a JNM-ECX500 (500 MHz <sup>1</sup>H, 126 MHz <sup>13</sup>C) instrument (JEOL Ltd., Tokyo, Japan). Chemical shift values (δ) are reported in ppm (tetramethylsilane δ 0.00 ppm or residual benzene δ 7.16 ppm for <sup>1</sup>H; residual chloroform δ 77.0 ppm or residual benzene δ 128.1 ppm for <sup>13</sup>C). The high-resolution mass spectra (HRMS) were conducted on a JMS-T100TD time-of-flight mass spectrometer (DART) (JEOL Ltd.) or a microTOF-Q II HRMS/MS instrument with electrospray ionizer (ESI) (Bruker, Billerica, MA, USA). Optical rotations were measured on a P-1030 digital polarimeter (JASCO Co., Ltd., Tokyo, Japan). Analytical high-performance liquid chromatography (HPLC) was performed on a PU1586 instrument with a MD-2018 plus diode array detector or PU1586 with a UV-1575 UV/V is detector (JASCO Co., Ltd.) using a chiral column under the conditions described below. The enantiomeric purity of the compounds was determined by HPLC analyses using chiral stationary phase columns.

**Materials:** Commercial grade reagents and solvents were used without further purification unless otherwise noted. Anhydrous dichloromethane and tetrahydrofuran (THF) were purchased from Kanto Chemical Co., Inc. and used after purification by a Glass Contour solvent dispensing system (Pure Process Technology, Nashua, NH, USA). Anhydrous *n*-hexane was purchased from Sigma-Aldrich (St. Louis, MO, USA). Deuterium oxide (99.8atom%D) was purchased from Tokyo Chemical Industry Co., Ltd (Tokyo, Japan). 2-(Bromomethyl)thiophen and 1-(bromomethyl)naphthalene were prepared according to literature procedures.<sup>1,2</sup> Catalyst **6** was prepared by following a previously reported procedure.<sup>3</sup> β-Ketocarboxylic acids **2** were synthesized by acidolysis of the corresponding *tert*-butyl β-ketoesters **4**.<sup>4</sup>

## 2. Synthesis of substrates and catalyst

### 2.1 Synthesis of *t*-butyl β-ketoesters **4**

#### *tert*-butyl 1-oxo-2-(prop-2-yn-1-yl)-1,2,3,4-tetrahydronaphthalene-2-carboxylate (**4d**)

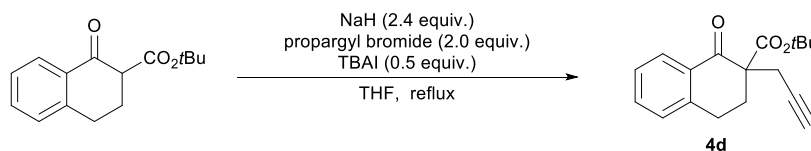

*tert*-Butyl 1-oxo-1,2,3,4-tetrahydronaphthalene-2-carboxylate (289 mg, 0.83 mmol) was added to a stirred suspension of NaH (60% in oil, washed with hexane, 77 mg, 1.98 mmol) in THF (4.1 mL) at 0 °C, and the mixture was stirred at room temperature for 30 min. Propargyl bromide (193 mg, 1.62 mmol) and tetrabutylammonium iodide (TBAI) (151 mg, 0.41 mmol) were added to the mixture, and the reaction mixture was stirred under reflux for 20 h. The reaction was quenched by adding saturated

NH<sub>4</sub>Cl aqueous solution at 0 °C and then extracted with ethyl acetate. The combined organic layer was dried over anhydrous Na<sub>2</sub>SO<sub>4</sub> and concentrated. The crude product was purified by flash column chromatography (hexane : ethyl acetate = 15 : 1) to provide the title compound as a pale yellow oil (194 mg, 82% yield).

**<sup>1</sup>H NMR** (500 MHz, CDCl<sub>3</sub>): δ 8.05 (dd, *J* = 7.6, 1.2 Hz, 1H), 7.47 (dt, *J* = 7.6, 1.2 Hz, 1H), 7.31 (t, *J* = 7.6 Hz, 1H), 7.23 (d, *J* = 7.6 Hz, 1H), 3.19–3.12 (m, 1H), 2.99–2.94 (m, 1H), 2.90 (dd, *J* = 16.8, 2.7 Hz, 1H), 2.81 (dd, *J* = 16.8, 2.7 Hz, 1H), 2.59–2.55 (m, 1H), 2.46–2.40 (m, 1H), 2.00 (t, *J* = 2.7 Hz, 1H), 1.34 (s, 9H); **<sup>13</sup>C NMR** (126 MHz, CDCl<sub>3</sub>): δ 194.1, 169.8, 142.9, 133.4, 132.1, 128.6, 127.8, 126.7, 82.6, 80.0, 70.9, 57.0, 30.8, 27.7, 25.9, 24.1; **IR** (NaCl): 2979, 1728, 1690, 1602, 1455, 1369, 1254, 1153, 737, 641 cm<sup>-1</sup>; **HRMS** (DART): [M + H]<sup>+</sup> calcd. for C<sub>18</sub>H<sub>21</sub>O<sub>3</sub>, 285.1491; found, 285.1491.

***tert*-butyl 1-oxo-2-(thiophen-2-ylmethyl)-1,2,3,4-tetrahydronaphthalene-2-carboxylate (4e)**

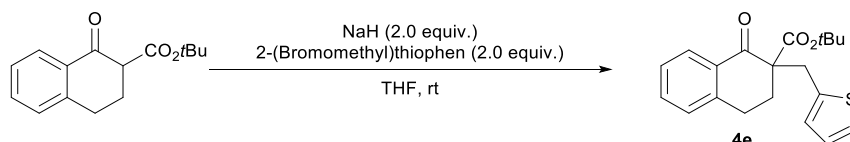

*tert*-Butyl 1-oxo-1,2,3,4-tetrahydronaphthalene-2-carboxylate (719 mg, 2.92 mmol) in THF (2.0 mL) was added to a stirred suspension of NaH (60% in oil, washed with hexane, 228 mg, 5.69 mmol) in THF (8.0 mL) at 0 °C, and the mixture was stirred at room temperature for 30 min. 2-(Bromomethyl)thiophen (1.0 g, 5.84 mmol) in THF (4.6 mL) was added to the mixture at 0 °C, and the reaction mixture was stirred at room temperature for 3.5 h. The reaction was quenched by adding saturated NH<sub>4</sub>Cl aqueous solution at 0 °C and then extracted with ethyl acetate. The combined organic layer was dried over anhydrous Na<sub>2</sub>SO<sub>4</sub> and concentrated. The crude product was purified by flash column chromatography (hexane : ethyl acetate = 15 : 1) to provide the title compound as a yellow oil (820 mg, 82% yield).

**<sup>1</sup>H NMR** (500 MHz, CDCl<sub>3</sub>): δ 8.07 (dd, *J* = 7.6, 1.2 Hz, 1H), 7.44 (dt, *J* = 7.6, 1.2 Hz, 1H), 7.30 (t, *J* = 7.6 Hz, 1H), 7.18 (d, *J* = 7.6 Hz, 1H), 7.13–7.11 (m, 1H), 6.89–6.88 (m, 2H), 3.65 (d, *J* = 14.5 Hz, 1H), 3.40 (d, *J* = 14.5 Hz, 1H), 3.08 (ddd, *J* = 16.1, 11.1, 4.6 Hz, 1H), 2.92–2.87 (m, 1H), 2.47–2.43 (m, 1H), 2.04 (ddd, *J* = 16.1, 11.1, 5.0 Hz, 1H), 1.32 (s, 9H); **<sup>13</sup>C NMR** (126 MHz, CDCl<sub>3</sub>): δ 195.1, 170.6, 142.8, 138.5, 133.2, 132.5, 128.6, 128.0, 127.8, 126.6, 126.4, 124.8, 82.4, 59.2, 33.9, 30.5, 27.7, 26.0; **IR** (NaCl): 2978, 2924, 1727, 1685, 1253, 1224, 1151, 732, 700, 515 cm<sup>-1</sup>; **HRMS** (DART): [M + H]<sup>+</sup> calcd. for C<sub>20</sub>H<sub>23</sub>O<sub>3</sub>S<sub>1</sub>, 343.1368; found, 343.1368.

***tert*-butyl 2-hexyl-1-oxo-1,2,3,4-tetrahydronaphthalene-2-carboxylate (4g)**

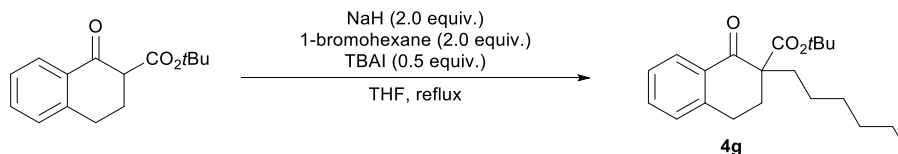

*tert*-Butyl 1-oxo-1,2,3,4-tetrahydronaphthalene-2-carboxylate (766 mg, 3.11 mmol) was added to a stirred suspension of NaH (60% in oil, washed with hexane, 243 mg, 6.06 mmol) in THF (15.2 mL) at 0 °C, and the mixture was stirred at room temperature for 30 min. 1-Bromohexane (1.0 g, 6.06

mmol) and tetrabutylammonium iodide (TBAI) (559 mg, 1.52 mmol) were added to the mixture, and the reaction mixture was stirred under reflux for 18 h. The reaction was quenched by adding saturated  $\text{NH}_4\text{Cl}$  aqueous solution at 0 °C and then extracted with ethyl acetate. The combined organic layer was dried over anhydrous  $\text{Na}_2\text{SO}_4$  and concentrated. The crude product was purified by flash column chromatography (hexane : ethyl acetate = 20 : 1) to provide the title compound as a yellow oil (944 mg, 94% yield).

$^1\text{H NMR}$  (500 MHz,  $\text{CDCl}_3$ ):  $\delta$  8.01 (dd,  $J = 7.6, 1.2$  Hz, 1H), 7.45 (dt,  $J = 7.6, 1.2$  Hz, 1H), 7.30 (t,  $J = 7.6$  Hz, 1H), 7.20 (d,  $J = 7.6$  Hz, 1H), 3.11–3.05 (m, 1H), 2.93–2.87 (m, 1H), 2.51–2.46 (m, 1H), 2.14–2.08 (m, 1H), 1.94–1.81 (m, 2H), 1.48–1.40 (m, 1H), 1.34 (s, 9H), 1.32–1.29 (m, 7H), 0.89–0.86 (m, 3H);  $^{13}\text{C NMR}$  (126 MHz,  $\text{CDCl}_3$ ):  $\delta$  196.1, 171.3, 142.8, 133.0, 132.7, 128.6, 127.7, 126.6, 81.7, 58.0, 33.9, 31.6, 30.8, 29.8, 27.8, 26.1, 24.6, 22.6, 14.0; **IR** (NaCl): 2954, 2930, 1727, 1692, 1368, 1296, 1252, 1150, 844, 737  $\text{cm}^{-1}$ ; **HRMS** (DART):  $[\text{M} + \text{H}]^+$  calcd. for  $\text{C}_{21}\text{H}_{31}\text{O}_3$ , 331.2273; found, 331.2273.

***tert*-butyl 1-(naphthalen-1-ylmethyl)-2-oxocyclohexane-1-carboxylate (4j)**

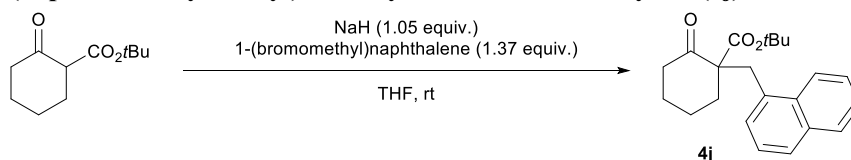

*tert*-butyl 2-oxocyclohexane-1-carboxylate (700 mg, 3.53 mmol) was added to a stirred suspension of NaH (60% in oil, washed with hexane, 148 mg, 3.71 mmol) in THF (11.7 mL) at 0 °C, and the mixture was stirred at room temperature for 1 h. 1-(bromomethyl)naphthalene (1.0 g, 4.24 mmol) were added to the mixture, and the reaction mixture was stirred at room temperature for 18 h. The reaction mixture was quenched by adding saturated  $\text{NH}_4\text{Cl}$  aqueous solution at 0 °C and then extracted with ethyl acetate. The combined organic layer was dried over anhydrous  $\text{Na}_2\text{SO}_4$  and concentrated. The crude product was purified by flash column chromatography (hexane : ethyl acetate = 10 : 1) to provide the title compound as an colorless oil (797 mg, 67% yield).

$^1\text{H NMR}$  (500 MHz,  $\text{CDCl}_3$ ):  $\delta$  8.07 (d,  $J = 8.4$  Hz, 1H), 7.82–7.80 (m, 1H), 7.72 (d,  $J = 8.4$  Hz, 1H), 7.48–7.36 (m, 4H), 3.78 (d,  $J = 14.5$  Hz, 1H), 3.49 (d,  $J = 14.5$  Hz, 1H), 2.54–2.46 (m, 2H), 2.39–2.36 (m, 1H), 2.01–1.98 (m, 1H), 1.65–1.41 (m, 4H), 1.22 (s, 9H);  $^{13}\text{C NMR}$  (126 MHz,  $\text{CDCl}_3$ ):  $\delta$  207.6, 170.4, 133.8, 133.5, 133.2, 128.80, 128.6, 127.2, 125.6, 125.2, 125.1, 124.6, 80.1, 62.9, 42.3, 36.7, 34.7, 27.6, 27.5, 22.7.

Spectroscopic data are consistent with those previously reported: J. L. Nôtre, D. van Melea and C. G. Frost *Adv. Synth. Catal.*, 2007, **349**, 432.

## 2.2 Synthesis of $\beta$ -keto-carboxylic acids **2**

### General procedure

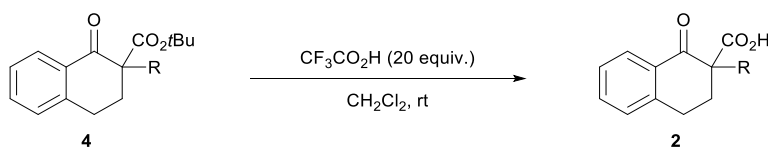

Trifluoroacetic acid (20 equiv.) was added to a stirred solution of  $\beta$ -ketoesters **4** in dichloromethane at 0 °C, and the reaction mixture was stirred at room temperature. The reaction mixture was concentrated, and then purified by flash column chromatography on silica gel to give  $\beta$ -keto-carboxylic acid **2**.

### **1-oxo-2-(prop-2-yn-1-yl)-1,2,3,4-tetrahydronaphthalene-2-carboxylic acid (2d)**

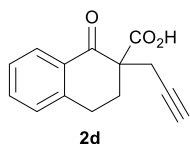

The title compound was prepared following **General procedure**, using **4d** (500 mg, 1.75 mmol) and trifluoroacetic acid (4.0 g, 35.0 mmol) in dichloromethane (8.8 mL), and the reaction mixture was stirred for 40 min. The crude product was purified by flash column chromatography (hexane : diethyl ether = 10 : 1 to 2 : 1) to provide the title compound as a brown solid (341 mg, 85% yield). **<sup>1</sup>H NMR** (500 MHz, CDCl<sub>3</sub>):  $\delta$  8.73 (br, 1H), 8.06 (dd,  $J = 7.6, 1.2$  Hz, 1H), 7.50 (dt,  $J = 7.6, 1.2$  Hz, 1H), 7.32 (t,  $J = 7.6$  Hz, 1H), 7.25 (d,  $J = 7.6$  Hz, 1H), 3.22–3.15 (m, 1H), 3.02–2.97 (m, 1H), 2.94 (dd,  $J = 16.8, 2.7$  Hz, 1H), 2.87 (dd,  $J = 16.8, 2.7$  Hz, 1H), 2.64–2.59 (m, 1H), 2.53 (ddd,  $J = 14.7, 10.3, 5.0$  Hz, 1H), 2.03 (t,  $J = 2.7$  Hz, 1H); **<sup>13</sup>C NMR** (126 MHz, CDCl<sub>3</sub>):  $\delta$  193.7, 176.1, 143.3, 134.1, 131.2, 128.9, 128.3, 127.0, 79.1, 71.7, 56.3, 30.1, 25.5, 24.1; **IR** (NaCl): 3293, 2935, 1719, 1685, 1601, 1455, 1238, 793, 742, 650 cm<sup>-1</sup>; **HRMS** (DART):  $[M + NH_4]^+$  calcd. for C<sub>14</sub>H<sub>16</sub>O<sub>3</sub>N<sub>1</sub>, 246.1130; found, 246.1130.

### **1-oxo-2-(thiophen-2-ylmethyl)-1,2,3,4-tetrahydronaphthalene-2-carboxylic acid (2e)**

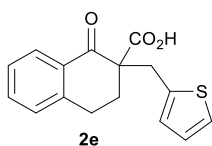

The title compound was prepared following **General procedure**, using **4e** (695 mg, 2.03 mmol) and trifluoroacetic acid (4.6 g, 40.6 mmol) in dichloromethane (10.1 mL), and the reaction mixture was stirred for 45 min. The crude product was purified by flash column chromatography (hexane : diethyl ether = 4 : 1 to 1 : 2) to provide the title compound as a white solid (424 mg, 73% yield). **<sup>1</sup>H NMR** (500 MHz, CDCl<sub>3</sub>):  $\delta$  8.10 (dd,  $J = 7.6, 1.2$  Hz, 1H), 7.51 (dt,  $J = 7.6, 1.2$  Hz, 1H), 7.34 (t,  $J = 7.6$  Hz, 1H), 7.23 (d,  $J = 7.6$  Hz, 1H), 7.14 (dd,  $J = 5.0, 1.2$  Hz, 1H), 6.91 (dd,  $J = 5.4, 3.4$  Hz, 1H), 6.88–6.87 (m, 1H), 3.66 (d,  $J = 14.9$  Hz, 1H), 3.47 (d,  $J = 14.9$  Hz, 1H), 3.13 (ddd,  $J = 14.1, 9.2, 5.0$  Hz, 1H), 3.03–2.97 (m, 1H), 2.51–2.46 (m, 1H), 2.22 (ddd,  $J = 14.1, 9.2, 5.0$  Hz, 1H); **<sup>13</sup>C NMR** (126 MHz, CDCl<sub>3</sub>):  $\delta$  195.0, 176.5, 143.3, 137.2, 134.1, 131.4, 128.8, 128.4, 128.2, 127.0, 126.7, 125.1,

58.3, 34.0, 29.5, 25.6; **IR** (NaCl): 3068, 2931, 1709, 1684, 1599, 1455, 1277, 1229, 742, 701  $\text{cm}^{-1}$ ; **HRMS** (ESI): No data. Protonated product **2e** was measured.

#### 2-hexyl-1-oxo-1,2,3,4-tetrahydronaphthalene-2-carboxylic acid (**2g**)

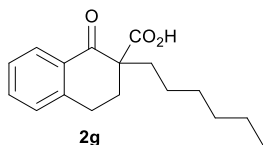

The title compound was prepared following **General procedure**, using **4g** (480 mg, 1.46 mmol) and trifluoroacetic acid (3.3 g, 29.2 mmol) in dichloromethane (7.3 mL), and the reaction mixture was stirred for 60 min. The crude product was purified by flash column chromatography (hexane : diethyl ether = 5 : 1 to 1 : 1) to provide the title compound as a pale red oil (322 mg, 82% yield), including 4% of **3g**.

**<sup>1</sup>H NMR** (500 MHz,  $\text{CDCl}_3$ ):  $\delta$  8.09 (dd,  $J = 7.6, 1.2$  Hz, 1H), 7.54 (dt,  $J = 7.6, 1.2$  Hz, 1H), 7.35 (t,  $J = 7.6$  Hz, 1H), 7.26 (d,  $J = 7.6$  Hz, 1H), 3.04 (t,  $J = 6.1$  Hz, 2H), 2.43 (t,  $J = 6.1$  Hz, 2H), 1.95–1.86 (m, 2H), 1.41–1.21 (m, 8H), 0.89–0.84 (m, 3H); **<sup>13</sup>C NMR** (126 MHz,  $\text{CDCl}_3$ ):  $\delta$  199.7, 174.4, 143.8, 134.6, 130.7, 128.9, 128.5, 127.1, 55.7, 34.5, 31.4, 29.4, 29.3, 25.2, 24.6, 22.5, 14.0; **IR** (NaCl): 2954, 2929, 2857, 1710, 1688, 1601, 1455, 1297, 1228, 741  $\text{cm}^{-1}$ ; **HRMS** (DART):  $[\text{M} + \text{H}]^+$  calcd. for  $\text{C}_{17}\text{H}_{23}\text{O}_3$ , 275.1647; found, 275.1647.

#### 1-(naphthalen-1-ylmethyl)-2-oxocyclohexane-1-carboxylic acid (**2j**)

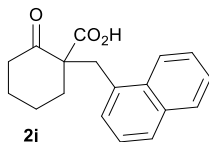

The title compound was prepared following **General procedure**, using **4j** (400 mg, 1.18 mmol) and trifluoroacetic acid (2.7 g, 23.63 mmol) in dichloromethane (5.9 mL), and the reaction mixture was stirred for 60 min. The crude product was purified by flash column chromatography (hexane : diethyl ether = 4 : 1 to 1 : 1) to provide the title compound as a colorless powder (199 mg, 60% yield).

**<sup>1</sup>H NMR** (500 MHz,  $\text{CDCl}_3$ ):  $\delta$  8.02 (d,  $J = 8.0$  Hz, 1H), 7.83–7.80 (m, 1H), 7.73 (d,  $J = 8.0$  Hz, 1H), 7.46–7.40 (m, 2H), 7.38–7.35 (m, 1H), 7.32–7.30 (m, 1H), 3.84 (d,  $J = 14.5$  Hz, 1H), 3.54 (d,  $J = 14.5$  Hz, 1H), 2.59–2.55 (m, 1H), 2.52–2.46 (m, 1H), 2.30–2.27 (m, 1H), 2.04–2.00 (m, 1H), 1.72–1.54 (m, 4H); **<sup>13</sup>C NMR** (126 MHz,  $\text{CDCl}_3$ ):  $\delta$  207.1, 177.3, 133.8, 133.0, 132.5, 128.8, 128.7, 127.7, 125.7, 125.3, 125.1, 124.0, 61.6, 41.6, 35.6, 35.3, 27.3, 22.4; **IR** (NaCl): 3048, 2941, 2866, 2335, 1705, 1596, 1509, 1396, 1271, 1218, 1126, 801, 781, 737  $\text{cm}^{-1}$  **HRMS** (ESI): No data. Protonated product **3j** was measured.

### 2.3 Synthesis of catalyst **5**

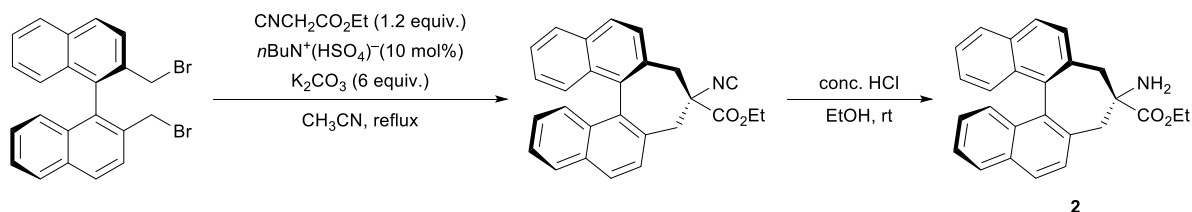

To a suspension of *(R)*-2,2'-bis(bromomethyl)-1,1'-binaphthalene (1.5 g, 3.41 mmol), tetrabutylammonium hydrogen sulfate (115 mg, 0.34 mmol, 10 mol%) and  $\text{K}_2\text{CO}_3$  (2.8 g, 20.4 mmol) in  $\text{CH}_3\text{CN}$  (34 mL) was added ethyl isocynoacetate (449  $\mu\text{L}$ , 4.08 mmol). The solution was refluxed for 18 h under argon atmosphere. The resulting mixture was filtered and the filtrate was concentrated. The residue was dissolved in ethanol (34 mL) was added  $\text{conc. HCl}$  (2.0 mL) at 0 °C. The solution was stirred at room temperature for 4.5 h under argon atmosphere. The reaction mixture was quenched by adding saturated  $\text{NaHCO}_3$  aqueous solution and then extracted with  $\text{CH}_2\text{Cl}_2$ . The combined organic layer was dried over anhydrous  $\text{Na}_2\text{SO}_4$  and concentrated. The crude product was purified by flash column chromatography ( $\text{CH}_2\text{Cl}_2$  : Methanol = 20 : 1) to provide **5** as a pale yellow powder (1077 mg, 83% yield).

$^1\text{H NMR}$  (500 MHz,  $\text{C}_6\text{D}_6$ ):  $\delta$  7.76–7.70 (m, 4H), 7.57–7.54 (m, 3H), 7.32 (d,  $J$  = 8.4 Hz, 1H), 7.23–7.18 (m, 2H), 7.00–6.95 (m, 2H), 2.43 (t,  $J$  = 6.1 Hz, 2H), 3.93–3.83 (m, 2H), 3.08 (d,  $J$  = 13.4 Hz, 1H), 3.05 (d,  $J$  = 13.4 Hz, 1H), 2.55 (d,  $J$  = 13.4 Hz, 1H), 2.27 (d,  $J$  = 1.34 Hz, 1H), 0.87 (t,  $J$  = 7.3 Hz, 3H);  $^{13}\text{C NMR}$  (126 MHz,  $\text{CDCl}_3$ ):  $\delta$  175.3, 136.9, 135.3, 134.8, 134.5, 133.6, 133.5, 132.5, 129.3, 129.1, 128.6, 128.3, 129.2, 125.5, 125.4, 69.0, 60.8, 43.7, 43.5, 14.1; **IR** (NaCl): 3374, 3051, 2979, 2932, 1726, 1508, 1444, 1365, 1224, 1210, 1039, 1026, 817, 750, 705  $\text{cm}^{-1}$ ; **HRMS** (ESI):  $[\text{M} + \text{H}]^+$  calcd. for  $\text{C}_{26}\text{H}_{24}\text{N}_2\text{O}_2$ , 382.1802; found, 382.1796.



### 3. Screening of amine catalysts

Amine catalyst (30 mol%) was added to a stirred solution of **2a** in *n*-hexane (0.1 M), and the reaction mixture was stirred at rt. The mixture was purified by flash column chromatography on silica gel to give **3a**.

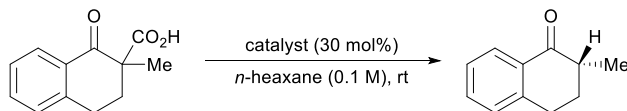

| entry | catalyst | temp. [°C] | time [h] | yield [%] <sup>a</sup> | ee [%] <sup>b</sup> |
|-------|----------|------------|----------|------------------------|---------------------|
| 1     | <b>1</b> | rt         | 8        | 86                     | 83                  |
| 2     | <b>5</b> | rt         | 46       | 89                     | 2                   |
| 3     | <b>6</b> | rt         | 56       | 100                    | 27                  |

<sup>a</sup>Isolated yield.

<sup>b</sup>Ee value were determined by chiral HPLC analysis.

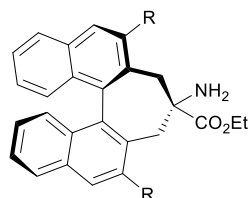

1: R = 3,5-(*t*Bu)<sub>2</sub>Ph

5: R = H

6: R = Ph

### 4. Enantioselective decarboxylative protonation

#### General procedure

Enantioselective decarboxylative protonation of **2** was performed by **General procedure** described below. When the reactions were performed, some starting compounds **2** contained 1–4% of *rac*-**3** because a few starting carboxylic acids **2** slowly decomposed to give **3** while standing at ambient temperature.

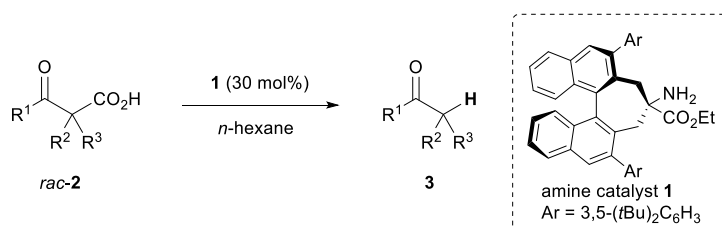

Amine catalyst **1** (30 mol%) was added to a stirred solution of  $\alpha,\alpha$ -dialkyl- $\beta$ -ketocarboxylic acids **2** (0.2–0.3 mmol) in *n*-hexane (2.0–3.0 mL), and the reaction mixture was stirred at 0 °C–room temperature. The mixture was purified by flash column chromatography on silica gel to give **3**.

**(R)-2-methyl-3,4-dihydronaphthalen-1(2H)-one (3a)**<sup>5</sup>

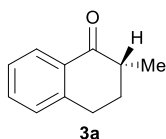

The title compound was prepared following **General procedure**, using 2-methyl-1-oxo-1,2,3,4-tetrahydronaphthalene-2-carboxylic acid **2a** (61 mg, 0.3 mmol) and amine catalyst **1** (68 mg, 0.09 mmol) in *n*-hexane (3.0 mL), and the reaction mixture was stirred at 0 °C for 182 h. The crude product was purified by flash column chromatography (hexane : ethyl acetate = 20 : 1) to provide the title compound as a colorless oil (47 mg, 98% yield, 89% ee).

<sup>1</sup>H NMR (500 MHz, CDCl<sub>3</sub>): δ 8.04 (dd, *J* = 7.6, 1.2 Hz, 1H), 7.45 (dt, *J* = 7.6, 1.2 Hz, 1H), 7.29 (t, *J* = 7.6 Hz, 1H), 7.23 (d, *J* = 7.6 Hz, 1H), 3.07–2.94 (m, 2H), 2.62–2.55 (m, 1H), 2.20 (ddd, *J* = 13.4, 8.8, 4.6 Hz, 1H), 1.92–1.84 (m, 1H), 1.27 (d, *J* = 6.9 Hz, 3H); <sup>13</sup>C NMR (126 MHz, CDCl<sub>3</sub>): δ 200.8, 144.2, 133.0, 132.4, 128.7, 127.4, 126.5, 42.6, 31.3, 28.8, 15.4; IR (NaCl): 2963, 2931, 1686, 1602, 1455, 1267, 1228, 968, 907, 739 cm<sup>-1</sup>; HRMS (DART): [M + H]<sup>+</sup> calcd. for C<sub>11</sub>H<sub>13</sub>O<sub>1</sub>, 161.0966; found, 161.0969; [α]<sub>D</sub><sup>26</sup> +39.0 (c = 1.32, CHCl<sub>3</sub>).

The enantiomeric purity of the title compound was determined by HPLC analyses (DAICEL CHIRALCEL OZ-H (0.46 cmφ×25 cm), hexane : *i*-PrOH = 150 : 1, flow rate = 0.7 mL/min, retention time; 12.6 min (major) and 13.4 min (minor)).

**(S)-2-benzyl-3,4-dihydronaphthalen-1(2H)-one (3b)**<sup>5</sup>

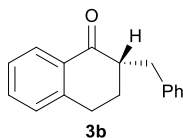

The title compound was prepared following **General procedure**, using 2-benzyl-1-oxo-1,2,3,4-tetrahydronaphthalene-2-carboxylic acid **2b** (91 mg, 0.3 mmol) and amine catalyst **1** (74 mg, 0.10 mmol) in *n*-hexane (3.3 mL), and the reaction mixture was stirred at 10 °C for 20 h. The crude product was purified by flash column chromatography (hexane : ethyl acetate = 20 : 1) to provide the title compound as a colorless oil (70 mg, 91% yield, 62% ee).

<sup>1</sup>H NMR (500 MHz, CDCl<sub>3</sub>): δ 8.07 (dd, *J* = 7.6, 1.2 Hz, 1H), 7.45 (dt, *J* = 7.6, 1.2 Hz, 1H), 7.31–7.28 (m, 3H), 7.23–7.20 (m, 4H), 3.49 (dd, *J* = 13.8, 3.8 Hz, 1H), 2.97–2.86 (m, 2H), 2.77–2.71 (m, 1H), 2.64 (dd, *J* = 13.8, 9.6 Hz, 1H), 2.09 (ddd, *J* = 13.4, 8.8, 4.6 Hz, 1H), 1.82–1.73 (m, 1H); <sup>13</sup>C NMR (126 MHz, CDCl<sub>3</sub>): δ 199.3, 144.0, 140.0, 133.2, 132.4, 129.2, 128.7, 128.3, 127.5, 126.6, 126.1, 49.4, 35.6, 28.6, 27.6; IR (NaCl): 3025, 2927, 1682, 1599, 1454, 1291, 1220, 933, 740, 700 cm<sup>-1</sup>; HRMS (DART): [M + NH<sub>4</sub>]<sup>+</sup> calcd. for C<sub>17</sub>H<sub>20</sub>O<sub>1</sub>N<sub>1</sub>, 254.1545; found, 254.1545; [α]<sub>D</sub><sup>26</sup> –8.4 (c = 1.63, CHCl<sub>3</sub>).

The enantiomeric purity of the title compound was determined by HPLC analyses (DAICEL CHIRALPAC IF-3 (0.46 cmφ×25 cm), hexane : *i*-PrOH = 150 : 1, flow rate = 0.8 mL/min, retention time; 22.0 min (minor) and 24.0 min (major)).

### (S)-2-allyl-3,4-dihydronaphthalen-1(2H)-one (3c) <sup>5</sup>

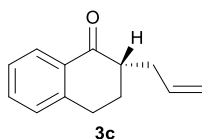

The title compound was prepared following **General procedure**, using 2-allyl-1-oxo-1,2,3,4-tetrahydronaphthalene-2-carboxylic acid **2c** (69 mg, 0.3 mmol) and amine catalyst **1** (68 mg, 0.09 mmol) in *n*-hexane (3.0 mL), and the reaction mixture was stirred at room temperature for 4 h. The crude product was purified by flash column chromatography (hexane : ethyl acetate = 20 : 1) to provide the title compound as a colorless oil (54 mg, 96% yield, 87% ee).

<sup>1</sup>H NMR (400 MHz, CDCl<sub>3</sub>): δ 8.04 (d, *J* = 7.6 Hz, 1H), 7.46 (t, *J* = 7.6 Hz, 1H), 7.30 (t, *J* = 7.6 Hz, 1H), 7.24 (d, *J* = 7.6 Hz, 1H), 5.89–5.81 (m, 1H), 5.13–5.06 (m, 2H), 2.99 (dd, *J* = 7.6, 4.6 Hz, 2H), 2.79–2.74 (m, 1H), 2.58–2.52 (m, 1H), 2.30–2.21 (m, 2H), 1.91–1.83 (m, 1H); <sup>13</sup>C NMR (126 MHz, CDCl<sub>3</sub>): δ 199.5, 144.1, 136.2, 133.2, 132.5, 128.7, 127.4, 126.6, 116.8, 47.2, 34.0, 28.6, 27.9; IR (NaCl): 2930, 2862, 1684, 1601, 1455, 1280, 1221, 996, 911, 744 cm<sup>-1</sup>; HRMS (DART): [M + H]<sup>+</sup> calcd. for C<sub>13</sub>H<sub>15</sub>O<sub>1</sub>, 187.1123; found, 187.1123; [α]<sub>D</sub><sup>26</sup> +20.7 (c = 2.36, CHCl<sub>3</sub>).

The enantiomeric purity of the title compound was determined by HPLC analyses (DAICEL CHIRALPAC IF-3 (0.46 cmφ×25 cm), hexane : *i*-PrOH = 150 : 1, flow rate = 0.7 mL/min, retention time; 16.0 min (major) and 17.1 min (minor)).

### 1-(prop-2-yn-1-yl)-3,4-dihydronaphthalen-1(2H)-one (3d)

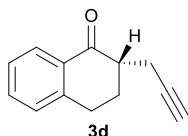

The title compound was prepared following **General procedure**, using 1-oxo-2-(prop-2-yn-1-yl)-1,2,3,4-tetrahydronaphthalene-2-carboxylic acid **2d** (69 mg, 0.3 mmol) and amine catalyst **1** (68 mg, 0.09 mmol) in *n*-hexane (3.0 mL), and the reaction mixture was stirred at 10 °C for 21 h. The crude product was purified by flash column chromatography (hexane : ethyl acetate = 20 : 1) to provide the title compound as a white solid (48 mg, 86% yield, 67% ee).

<sup>1</sup>H NMR (500 MHz, CDCl<sub>3</sub>): δ 8.04 (dd, *J* = 7.6, 1.2 Hz, 1H), 7.48 (dt, *J* = 7.6, 1.2 Hz, 1H), 7.31 (t, *J* = 7.6 Hz, 1H), 7.26–7.25 (m, 1H), 3.13–3.01 (m, 2H), 2.91 (ddd, *J* = 6.9, 4.2, 2.7 Hz, 1H), 2.68 (ddd, *J* = 13.0, 8.4, 4.2 Hz, 1H), 2.52–2.44 (m, 2H), 2.00 (t, *J* = 2.7 Hz, 1H); <sup>13</sup>C NMR (126 MHz, CDCl<sub>3</sub>): δ 197.8, 144.1, 133.4, 132.1, 128.7, 127.4, 126.6, 82.2, 69.7, 46.6, 28.9, 28.1, 19.3; IR (NaCl): 3292, 2931, 2862, 1684, 1600, 1684, 1455, 1284, 1221, 744, 636 cm<sup>-1</sup>; HRMS (DART): [M + NH<sub>4</sub>]<sup>+</sup> calcd. for C<sub>13</sub>H<sub>16</sub>O<sub>1</sub>N<sub>1</sub>, 202.1232; found, 202.1232; [α]<sub>D</sub><sup>26</sup> -6.6 (c = 1.36, CHCl<sub>3</sub>).

The enantiomeric purity of the title compound was determined by HPLC analyses (DAICEL CHIRALPAC IF-3 (0.46 cmφ×25 cm), hexane : *i*-PrOH = 99 : 1, flow rate = 0.7 mL/min, retention time; 21.9 min (major) and 23.5 min (minor)).

### 2-(thiophen-2-ylmethyl)-3,4-dihydronaphthalen-1(2H)-one (3e)

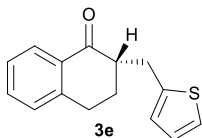

The title compound was prepared following **General procedure**, using 1-oxo-2-(thiophen-2-ylmethyl)-1,2,3,4-tetrahydronaphthalene-2-carboxylic acid **2e** (87 mg, 0.3 mmol) and amine catalyst **1** (68 mg, 0.09 mmol) in *n*-hexane (3.0 mL), and the reaction mixture was stirred at room temperature for 3 h. The crude product was purified by flash column chromatography (hexane : ethyl acetate = 20 : 1) to provide the title compound as a colorless oil (72 mg, 98% yield, 67% ee).

**<sup>1</sup>H NMR** (500 MHz, CDCl<sub>3</sub>): δ 8.07 (dd, *J* = 7.6, 1.2 Hz, 1H), 7.47 (dt, *J* = 7.6, 1.2 Hz, 1H), 7.31 (t, *J* = 7.6 Hz, 1H), 7.23 (d, *J* = 7.6 Hz, 1H), 7.14 (d, *J* = 5.0 Hz, 1H), 6.93 (dd, *J* = 5.0, 3.4 Hz, 1H), 6.86 (d, *J* = 3.4 Hz, 1H), 3.59 (dd, *J* = 14.9, 4.2 Hz, 1H), 3.04 (dd, *J* = 14.9, 4.2 Hz, 1H), 3.00–2.95 (m, 2H), 2.77 (ddd, *J* = 13.0, 8.8, 4.2 Hz, 1H), 2.23 (ddd, *J* = 13.0, 8.8, 4.2 Hz, 1H), 1.89–1.80 (m, 1H); **<sup>13</sup>C NMR** (126 MHz, CDCl<sub>3</sub>): δ 198.7, 144.0, 142.2, 133.3, 132.3, 128.7, 127.5, 126.7, 126.6, 125.8, 123.6, 49.6, 29.8, 28.7, 27.8; **IR** (NaCl): 3067, 2928, 2862, 1677, 1599, 1455, 1287, 1225, 753, 698 cm<sup>-1</sup>; **HRMS** (ESI): [M + Na]<sup>+</sup> calcd. for C<sub>15</sub>H<sub>14</sub>O<sub>1</sub>S<sub>1</sub>Na<sub>1</sub>, 265.0658; found, 265.0654; [α]<sub>D</sub><sup>27</sup> -31.3 (c = 2.28, CHCl<sub>3</sub>).

The enantiomeric purity of the title compound was determined by HPLC analyses (DAICEL CHIRALPAC IE-3 (0.46 cmφ×25 cm), hexane : *i*-PrOH = 98 : 2, flow rate = 0.7 mL/min, retention time; 23.5 min (major) and 26.0 min (minor)).

### 2-(3-chloropropyl)-3,4-dihydronaphthalen-1(2H)-one (3f)

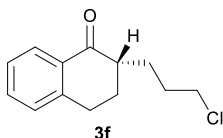

The title compound was prepared following **General procedure**, using 2-(3-chloropropyl)-1-oxo-1,2,3,4-tetrahydronaphthalene-2-carboxylic acid **2f** (80 mg, 0.3 mmol) and amine catalyst **1** (68 mg, 0.09 mmol) in *n*-hexane (3.0 mL), and the reaction mixture was stirred at 0 °C for 23 h. The crude product was purified by flash column chromatography (hexane : ethyl acetate = 20 : 1) to provide the title compound as a colorless oil (63 mg, 95% yield, 76% ee).

**<sup>1</sup>H NMR** (500 MHz, CDCl<sub>3</sub>): δ 8.02 (dd, *J* = 7.6, 1.2 Hz, 1H), 7.46 (dt, *J* = 7.6, 1.2 Hz, 1H), 7.30 (t, *J* = 7.6 Hz, 1H), 7.24 (d, *J* = 7.6 Hz, 1H), 3.63–3.55 (m, 2H), 3.02 (dd, *J* = 7.6, 5.0 Hz, 2H), 2.54–2.48 (m, 1H), 2.24 (ddd, *J* = 13.4, 9.6, 5.0 Hz, 1H), 2.09–2.02 (m, 1H), 1.95–1.89 (m, 3H), 1.71–1.65 (m, 1H); **<sup>13</sup>C NMR** (126 MHz, CDCl<sub>3</sub>): δ 199.8, 143.8, 133.2, 132.4, 128.7, 127.4, 126.6, 46.9, 45.1, 30.2, 28.6, 28.5, 27.2; **IR** (NaCl): 2931, 2858, 1682, 1601, 1455, 1293, 1228, 914, 741, 649 cm<sup>-1</sup>; **HRMS** (DART): [M + NH<sub>4</sub>]<sup>+</sup> calcd. for C<sub>13</sub>H<sub>19</sub>O<sub>1</sub>N<sub>1</sub>Cl<sub>1</sub>, 240.1155; found, 240.1155; [α]<sub>D</sub><sup>27</sup> +17.8 (c = 1.01, CHCl<sub>3</sub>).

The enantiomeric purity of the title compound was determined by HPLC analyses (DAICEL CHIRALPAC IF-3 (0.46 cmφ×25 cm), hexane : *i*-PrOH = 150 : 1, flow rate = 0.7 mL/min, retention time; 38.0 min (major) and 40.2 min (minor)).

### 2-hexyl-3,4-dihydronaphthalen-1(2H)-one (3g)

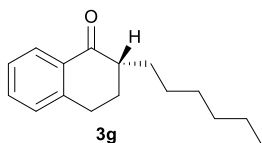

The title compound was prepared following **General procedure**, using 2-hexyl-1-oxo-1,2,3,4-tetrahydronaphthalene-2-carboxylic acid **2g** (83 mg, 0.3 mmol) and amine catalyst **1** (69 mg, 0.09 mmol) in *n*-hexane (3.0 mL), and the reaction mixture was stirred at 0 °C for 28 h. The crude product was purified by flash column chromatography (hexane : ethyl acetate = 20 : 1) to provide the title compound as a colorless oil (56 mg, 80% yield, 82% ee).

<sup>1</sup>H NMR (500 MHz, CDCl<sub>3</sub>): δ 8.02 (d, *J* = 7.6 Hz, 1H), 7.44 (t, *J* = 7.6 Hz, 1H), 7.29 (t, *J* = 7.6 Hz, 1H), 7.22 (t, *J* = 7.6 Hz, 1H), 3.04–2.93 (m, 2H), 2.49–2.44 (m, 1H), 2.23 (ddd, *J* = 14.1, 9.6, 4.6 Hz, 1H), 1.97–1.86 (m, 2H), 1.53–1.21 (m, 9H), 0.90–0.87 (m, 3H); <sup>13</sup>C NMR (126 MHz, CDCl<sub>3</sub>): δ 200.5, 143.9, 133.0, 132.5, 128.6, 127.4, 126.5, 47.5, 31.7, 29.4, 29.4, 28.3, 28.1, 27.0, 22.6, 14.1; IR (NaCl): 2951, 2926, 2854, 1685, 1600, 1455, 1286, 1224, 910, 742 cm<sup>-1</sup>; HRMS (DART): [M + H]<sup>+</sup> calcd. for C<sub>16</sub>H<sub>23</sub>O<sub>1</sub>, 231.1749; found, 231.1749; [α]<sub>D</sub><sup>27</sup> +17.2 (c = 1.28, CHCl<sub>3</sub>).

The enantiomeric purity of the title compound was determined by HPLC analyses (DAICEL CHIRALPAC IF-3 (0.46 cmφ×25 cm), hexane : *i*-PrOH = 150 : 1, flow rate = 1.0 mL/min, retention time; 10.3 min (minor) and 10.8 min (major)).

### (*R*)-2-methyl-2,3-dihydro-1H-inden-1-one (3h) <sup>5</sup>

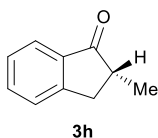

The title compound was prepared following **General procedure**, using 2-methyl-1-oxo-2,3-dihydro-1H-indene-2-carboxylic acid **2h** (44 mg, 0.23 mmol) and amine catalyst **1** (52 mg, 0.07 mmol) in *n*-hexane (2.3 mL), and the reaction mixture was stirred at 0 °C for 6 h. The crude product was purified by flash column chromatography (hexane : diethyl ether = 8 : 1) to provide the title compound as a colorless oil (24 mg, 70% yield, 57% ee).

<sup>1</sup>H NMR (500 MHz, CDCl<sub>3</sub>): δ 7.76 (d, *J* = 7.6 Hz, 1H), 7.59 (t, *J* = 7.6 Hz, 1H), 7.45 (d, *J* = 7.6 Hz, 1H), 7.37 (t, *J* = 7.6 Hz, 1H), 3.43–3.38 (m, 1H), 2.76–2.68 (m, 2H), 1.32 (d, *J* = 7.6 Hz, 3H); <sup>13</sup>C NMR (126 MHz, CDCl<sub>3</sub>): δ 209.5, 153.5, 136.3, 134.7, 127.3, 126.5, 124.0, 42.0, 34.9, 16.3; IR (NaCl): 2963, 2929, 1713, 1608, 1464, 1293, 1204, 965, 787, 742 cm<sup>-1</sup>; HRMS (DART): [M + NH<sub>4</sub>]<sup>+</sup> calcd. for C<sub>10</sub>H<sub>14</sub>O<sub>1</sub>N<sub>1</sub>, 164.1075; found, 164.1076; [α]<sub>D</sub><sup>26</sup> –24.6 (c = 0.53, CHCl<sub>3</sub>).

The enantiomeric purity of the title compound was determined by HPLC analyses (DAICEL CHIRALCEL OJ-H (0.46 cmφ×25 cm), hexane : *i*-PrOH = 9 : 1, flow rate = 0.5 mL/min, retention time; 11.0 min (minor) and 11.6 min (major)).

### (S)-2-benzylcyclohexan-1-one (**3i**)<sup>6</sup>

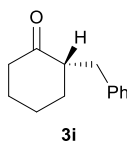

The title compound was prepared following **General procedure**, using 1-benzyl-2-oxocyclohexane-1-carboxylic acid **2i** (68 mg, 0.29 mmol) and amine catalyst **1** (66 mg, 0.09 mmol) in *n*-hexane (2.9 mL), and the reaction mixture was stirred at room temperature for 1 h. The crude product was purified by flash column chromatography (hexane : ethyl acetate = 15 : 1) to provide the title compound as a colorless oil (38 mg, 69% yield, 24% ee).

<sup>1</sup>H NMR (500 MHz, CDCl<sub>3</sub>): δ 7.29–7.26 (m, 2H), 7.20–7.15 (m, 3H), 3.24 (dd, *J* = 13.8, 4.6 Hz, 1H), 2.58–2.52 (m, 1H), 2.46–2.39 (m, 2H), 2.36–2.30 (m, 1H), 2.09–1.99 (m, 2H), 1.85–1.81 (m, 1H), 1.73–1.53 (m, 2H), 1.40–1.31 (m, 1H); <sup>13</sup>C NMR (126 MHz, CDCl<sub>3</sub>): δ 212.6, 140.3, 129.1, 128.3, 52.5, 42.2, 35.4, 33.4, 28.0, 25.0; IR (NaCl): 2936, 2862, 1710, 1452, 1131, 769, 732, 700, 516 cm<sup>-1</sup>; HRMS (ESI): [M + Na]<sup>+</sup> calcd. for C<sub>13</sub>H<sub>16</sub>O<sub>1</sub>Na<sub>1</sub>, 211.1093; found, 211.1093; [α]<sub>D</sub><sup>24</sup> –10.1 (c = 0.45, CHCl<sub>3</sub>).

The enantiomeric purity of the title compound was determined by HPLC analyses (DAICEL CHIRALCEL OJ-H (0.46 cmφ×25 cm), hexane : *i*-PrOH = 98 : 2, flow rate = 1.0 mL/min, retention time; 10.5 min (minor) and 11.7 min (major))

### 2-(naphthalen-1-ylmethyl)cyclohexan-1-one (**3j**)

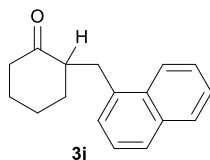

The title compound was prepared following **General procedure**, using 2-methyl-3-oxo-2,3-diphenylpropanoic acid **2j** (56 mg, 0.20 mmol) and amine catalyst **1** (46 mg, 0.06 mmol) in *n*-hexane (2.0 mL), and the reaction mixture was stirred at room temperature for 11 h. The crude product was purified by flash column chromatography (hexane : ethyl acetate = 10 : 1 to 4 : 1) to provide the title compound as a colorless oil (30 mg, 64% yield, 30% ee).

<sup>1</sup>H NMR (500 MHz, CDCl<sub>3</sub>): δ 7.94–7.92 (m, 1H), 7.87–7.85 (m, 1H), 7.72 (d, *J* = 8.0 Hz, 1H), 7.51–7.46 (m, 2H), 7.38 (dd, *J* = 8.0, 7.1 Hz, 1H), 7.31 (d, *J* = 6.9 Hz, 1H), 3.85 (dd, *J* = 13.8, 3.6 Hz, 1H), 2.75 (dd, *J* = 13.8, 9.2 Hz, 1H), 2.72–2.66 (m, 1H), 2.48 (dddd, *J* = 13.8, 4.6, 3.1, 1.5 Hz, 1H), 2.34 (dddd, *J* = 13.4, 13.4, 6.1, 1.2 Hz, 1H), 2.09–2.03 (m, 1H), 2.01–1.96 (m, 1H), 1.83–1.79 (m, 1H), 1.75–1.62 (m, 1H), 1.55–1.40 (m, 1H); <sup>13</sup>C NMR (126 MHz, CDCl<sub>3</sub>): δ 212.5, 136.3, 133.9, 131.9, 128.9, 127.4, 126.8, 125.8, 125.4, 125.3, 123.7, 51.4, 42.2, 33.8, 32.4, 28.0, 25.1; IR (NaCl): 2935, 2860, 1708, 1596, 1509, 1447, 1396, 1127, 801, 780, 506 cm<sup>-1</sup>; HRMS (ESI): [M + Na]<sup>+</sup> calcd. for C<sub>17</sub>H<sub>18</sub>O<sub>1</sub>Na<sub>1</sub>, 261.1250; found, 261.1252; [α]<sub>D</sub><sup>26</sup> –10.5 (c = 1.42, CHCl<sub>3</sub>).

The enantiomeric purity of the title compound was determined by HPLC analyses (DAICEL CHIRALCEL IC-3 (0.46 cmφ×25 cm), hexane : *i*-PrOH = 50 : 1, flow rate = 1.0 mL/min, retention time; 13.6 min (major) and 15.7 min (minor)).

### (*R*)-1,2-diphenylpropan-1-one (**3k**)<sup>7</sup>

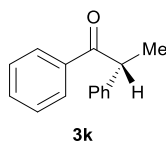

The title compound was prepared following **General procedure**, using 2-methyl-3-oxo-2,3-diphenylpropanoic acid **3k** (64 mg, 0.25 mmol) and amine catalyst **1** (57 mg, 0.08 mmol) in *n*-hexane (2.5 mL), and the reaction mixture was stirred at room temperature for 2 h. The crude product was purified by flash column chromatography (hexane : ethyl acetate = 20 : 1) to provide the title compound as a colorless oil (32 mg, 61% yield, 23% ee).

<sup>1</sup>H NMR (500 MHz, CDCl<sub>3</sub>): δ 7.96–7.94 (m, 2H), 7.49–7.46 (m, 1H), 7.40–7.36 (m, 2H), 7.30–7.28 (m, 4H), 7.23–7.18 (m, 1H), 4.69 (q, *J* = 6.9 Hz, 1H), 1.54 (d, *J* = 6.9 Hz, 3H); <sup>13</sup>C NMR (126 MHz, CDCl<sub>3</sub>): δ 200.3, 141.4, 136.4, 132.7, 128.9, 128.7, 128.4, 127.7, 126.8, 47.8, 19.5; IR (NaCl): 2975, 2930, 1683, 1597, 1448, 1222, 952, 758, 698, 564 cm<sup>-1</sup>; HRMS (ESI): [M + Na]<sup>+</sup> calcd. for C<sub>15</sub>H<sub>14</sub>O<sub>1</sub>Na<sub>1</sub>, 233.0937; found, 233.0937; [α]<sub>D</sub><sup>24</sup> –40.1 (c = 1.49, CHCl<sub>3</sub>).

The enantiomeric purity of the title compound was determined by HPLC analyses (DAICEL CHIRALCEL OJ-H (0.46 cmφ×25 cm), hexane : *i*-PrOH = 99 : 1, flow rate = 1.0 mL/min, retention time; 18.6 min (minor) and 21.6 min (major)).

## 5. Enantioselective decarboxylative deuteration

### General procedure

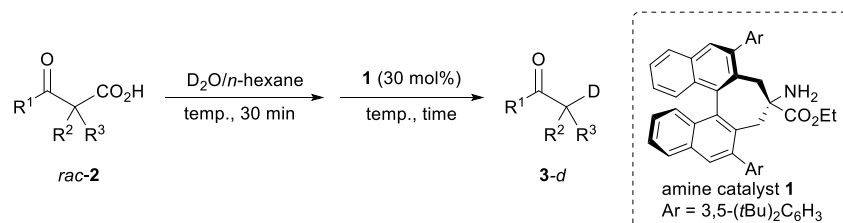

$\alpha,\alpha$ -Dialkyl- $\beta$ -ketocarboxylic acid **2** (0.3 mmol) was added to a stirred solution of deuterium oxide and *n*-hexane (1 : 1, 1.5 mL), and the mixture was stirred for 30 min. Then, amine catalyst **1** (30 mol%) was added to the mixture and stirred for a further 1–66 h. The reaction mixture was directly purified by flash column chromatography on silica gel to give corresponding  $\alpha$ -deuterated ketone **3-d**.

### 2-methyl-3,4-dihydronaphthalen-1(2H)-one-2-*d* (**3a-d**)<sup>8</sup>

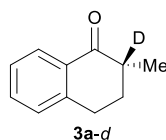

The title compound was prepared following **General procedure**, using 2-methyl-1-oxo-1,2,3,4-tetrahydronaphthalene-2-carboxylic acid **2a** (61 mg, 0.3 mmol) in *n*-hexane : D<sub>2</sub>O (1 : 1, 1.5 mL), and the reaction mixture was stirred at room temperature for 30 min. Then, the reaction mixture was added amine catalyst **1** (68 mg, 0.09 mmol), and stirred at room temperature for 15 h. The crude product was

purified by flash column chromatography (hexane : ethyl acetate = 20 : 1) to provide the title compound as a colorless oil (43 mg, 90% yield, 84% ee, 90% D).

**<sup>1</sup>H NMR** (500 MHz, CDCl<sub>3</sub>): δ 8.03 (d, *J* = 7.6 Hz, 1H), 7.44 (t, *J* = 7.6 Hz, 1H), 7.29 (t, *J* = 7.6 Hz, 1H), 7.23 (d, *J* = 7.6 Hz, 1H), 3.07–2.94 (m, 2H), 2.19 (dt, *J* = 13.4, 4.6 Hz, 1H), 1.90–1.84 (m, 1H), 1.26 (s, 3H); **<sup>13</sup>C NMR** (126 MHz, CDCl<sub>3</sub>): δ 200.8, 144.1, 133.0, 132.3, 128.7, 127.3, 126.5, 42.1 (t, *J* = 19.2 Hz), 31.2, 28.7, 15.3; **IR** (NaCl): 2963, 2931, 1686, 1601, 1455, 1303, 1227, 968, 765, 729 cm<sup>-1</sup>; **HRMS** (DART): [M + NH<sub>4</sub>]<sup>+</sup> calcd. for C<sub>11</sub>H<sub>15</sub>O<sub>1</sub>N<sub>1</sub>D<sub>1</sub>, 179.1295; found, 179.1295; [α]<sub>D</sub><sup>27</sup> +35.3 (c = 1.33, CHCl<sub>3</sub>).

The enantiomeric purity of the title compound was determined by HPLC analyses (DAICEL CHIRALCEL OZ-H (0.46 cmφ×25 cm), hexane : *i*-PrOH = 150 : 1, flow rate = 0.7 mL/min, retention time; 13.0 min (major) and 13.9 min (minor))

### 2-benzyl-3,4-dihydronaphthalen-1(2H)-one-2-*d* (3b-*d*)

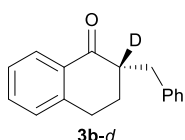

The title compound was prepared following **General procedure**, using 2-benzyl-1-oxo-1,2,3,4-tetrahydronaphthalene-2-carboxylic acid **2b** (92 mg, 0.33 mmol) in *n*-hexane : D<sub>2</sub>O (1 : 1, 1.6 mL), and the reaction mixture was stirred at 10 °C for 30 min. Then, the reaction mixture was added amine catalyst **1** (75 mg, 0.10 mmol), and stirred at 10 °C for 19 h. The crude product was purified by flash column chromatography (hexane : ethyl acetate = 20 : 1) to provide the title compound as a colorless oil (68 mg, 87% yield, 62% ee, 87% D).

**<sup>1</sup>H NMR** (500 MHz, CDCl<sub>3</sub>): δ 8.06 (d, *J* = 7.6 Hz, 1H), 7.46 (dt, *J* = 7.6, 1.2 Hz, 1H), 7.32–7.29 (m, 3H), 7.23–7.21 (m, 4H), 3.47 (d, *J* = 13.8 Hz, 1H), 2.98–2.87 (m, 2H), 2.64 (d, *J* = 13.8 Hz, 1H), 2.10 (ddd, *J* = 13.4, 9.2, 4.6 Hz, 1H), 1.83–1.76 (m, 1H); **<sup>13</sup>C NMR** (126 MHz, CDCl<sub>3</sub>): δ 199.3, 143.9, 139.9, 133.2, 132.4, 129.2, 128.6, 128.3, 127.4, 126.5, 126.0, 48.8 (t, *J* = 19.2 Hz), 35.5, 28.4, 27.4; **IR** (NaCl): 3026, 2927, 1677, 1600, 1496, 1454, 1291, 1231, 745, 700 cm<sup>-1</sup>; **HRMS** (DART): [M + NH<sub>4</sub>]<sup>+</sup> calcd. for C<sub>17</sub>H<sub>18</sub>O<sub>1</sub>N<sub>1</sub>D<sub>1</sub>, 254.1529; found, 254.1530; [α]<sub>D</sub><sup>26</sup> -6.2 (c = 2.49, CHCl<sub>3</sub>).

The enantiomeric purity of the title compound was determined by HPLC analyses (DAICEL CHIRALPAC IF-3 (0.46 cmφ×25 cm), hexane : *i*-PrOH = 150 : 1, flow rate = 0.8 mL/min, retention time; 21.9 min (minor) and 23.5 min (major)).

### 2-allyl-3,4-dihydronaphthalen-1(2H)-one-2-*d* (3c-*d*)

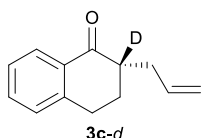

The title compound was prepared following **General procedure**, using 2-allyl-1-oxo-1,2,3,4-tetrahydronaphthalene-2-carboxylic acid **2c** (73 mg, 0.32 mmol) in *n*-hexane : D<sub>2</sub>O (1 : 1, 1.6 mL), and the reaction mixture was stirred at room temperature for 30 min. Then, the reaction mixture was added amine catalyst **1** (72 mg, 0.09 mmol), and stirred at room temperature for 6 h. The crude product



was purified by flash column chromatography (hexane : ethyl acetate = 20 : 1) to provide the title compound as a colorless oil (59 mg, 98% yield, 87% ee, 87% D).

$^1\text{H NMR}$  (500 MHz,  $\text{CDCl}_3$ ):  $\delta$  8.04 (dd,  $J = 7.6, 1.2$  Hz, 1H), 7.46 (dt,  $J = 7.6, 1.2$  Hz, 1H), 7.30 (t,  $J = 7.6$  Hz, 1H), 7.24 (d,  $J = 7.6$  Hz, 1H), 5.89–5.81 (m, 1H), 5.15–5.06 (m, 2H), 3.00 (dd,  $J = 7.6, 4.6$  Hz, 2H), 2.77–2.73 (m, 1H), 2.30–2.21 (m, 2H), 1.91–1.83 (m, 1H);  $^{13}\text{C NMR}$  (126 MHz,  $\text{CDCl}_3$ ):  $\delta$  199.5, 144.0, 136.1, 133.1, 132.4, 128.7, 127.4, 126.5, 116.8, 46.6 (t,  $J = 19.2$  Hz), 33.9, 28.5, 27.8; **IR** (NaCl): 3073, 2931, 1684, 1601, 1455, 1237, 1156, 995, 915, 740  $\text{cm}^{-1}$ ; **HRMS** (DART):  $[\text{M} + \text{H}]^+$  calcd. for  $\text{C}_{13}\text{H}_{14}\text{O}_1\text{D}_1$ , 188.1186; found, 188.1186;  $[\alpha]_{\text{D}}^{26} +25.8$  ( $c = 1.99$ ,  $\text{CHCl}_3$ ).

The enantiomeric purity of the title compound was determined by HPLC analyses (DAICEL CHIRALPAC IF-3 (0.46  $\text{cm}\phi \times 25$  cm), hexane : *i*-PrOH = 150 : 1, flow rate = 0.7 mL/min, retention time; 16.3 min (major) and 17.3 min (minor)).

### 2-(prop-2-yn-1-yl)-3,4-dihydronaphthalen-1(2H)-one-2-*d* (3d-*d*)

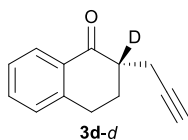

The title compound was prepared following **General procedure**, using 1-oxo-2-(prop-2-yn-1-yl)-1,2,3,4-tetrahydronaphthalene-2-carboxylic acid **2d** (69 mg, 0.3 mmol) in *n*-hexane :  $\text{D}_2\text{O}$  (1 : 1, 1.5 mL), and the reaction mixture was stirred at 10 °C for 30 min. Then, the reaction mixture was added amine catalyst **1** (68 mg, 0.09 mmol), and stirred at 10 °C for 22 h. The crude product was purified by flash column chromatography (hexane : ethyl acetate = 20 : 1) to provide the title compound as a white solid (53 mg, 95% yield, 69% ee, 90% D).

$^1\text{H NMR}$  (500 MHz,  $\text{CDCl}_3$ ):  $\delta$  8.04 (d,  $J = 7.6$  Hz, 1H), 7.48 (t,  $J = 7.6$  Hz, 1H), 7.31 (t,  $J = 7.6$  Hz, 1H), 7.26–7.25 (m, 1H), 3.13–3.01 (m, 2H), 2.90 (dd,  $J = 17.2, 2.7$  Hz, 1H), 2.51–2.45 (m, 2H), 2.00 (t,  $J = 2.7$  Hz, 1H);  $^{13}\text{C NMR}$  (126 MHz,  $\text{CDCl}_3$ ):  $\delta$  198.0, 144.1, 133.4, 132.2, 128.7, 127.5, 126.6, 82.3, 69.7, 46.2 (t,  $J = 19.2$  Hz), 28.9, 28.1, 19.2; **IR** (NaCl): 3295, 2933, 1681, 1600, 1455, 1290, 1238, 1217, 766, 740  $\text{cm}^{-1}$ ; **HRMS** (DART):  $[\text{M} + \text{H}]^+$  calcd. for  $\text{C}_{13}\text{H}_{12}\text{O}_1\text{D}_1$ , 186.1030; found, 186.1030;  $[\alpha]_{\text{D}}^{27} -11.7$  ( $c = 1.93$ ,  $\text{CHCl}_3$ ).

The enantiomeric purity of the title compound was determined by HPLC analyses (DAICEL CHIRALPAC IF-3 (0.46  $\text{cm}\phi \times 25$  cm), hexane : *i*-PrOH = 99 : 1, flow rate = 0.7 mL/min, retention time; 22.2 min (major) and 23.8 min (minor)).

### 2-(thiophen-2-ylmethyl)-3,4-dihydronaphthalen-1(2H)-one-2-*d* (3e-*d*)

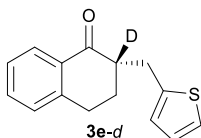

The title compound was prepared following **General procedure**, using 1-oxo-2-(thiophen-2-ylmethyl)-1,2,3,4-tetrahydronaphthalene-2-carboxylic acid **2e** (86 mg, 0.3 mmol) in *n*-hexane :  $\text{D}_2\text{O}$  (1 : 1, 1.5 mL), and the reaction mixture was stirred at room temperature for 30 min. Then, the reaction mixture was added amine catalyst **1** (68 mg, 0.09 mmol), and stirred at room temperature for 6.5 h.

The crude product was purified by flash column chromatography (hexane : ethyl acetate = 20 : 1) to provide the title compound as a colorless oil (72 mg, 98% yield, 64% ee, 90% D).

**<sup>1</sup>H NMR** (500 MHz, CDCl<sub>3</sub>): δ 8.06 (dd, *J* = 7.6, 1.2 Hz, 1H), 7.46 (dt, *J* = 7.6, 1.2 Hz, 1H), 7.31 (t, *J* = 7.6 Hz, 1H), 7.22 (d, *J* = 7.6 Hz, 1H), 7.14 (dd, *J* = 5.0, 1.2 Hz, 1H), 6.93 (dd, *J* = 5.0, 3.4 Hz, 1H), 6.85 (d, *J* = 3.4 Hz, 1H), 3.57 (d, *J* = 14.9 Hz, 1H), 3.03 (d, *J* = 14.9 Hz, 1H), 2.99–2.95 (m, 2H), 2.24–2.19 (m, 1H), 1.88–1.80 (m, 1H); **<sup>13</sup>C NMR** (126 MHz, CDCl<sub>3</sub>): δ 198.9, 144.0, 142.2, 133.3, 132.4, 128.7, 127.5, 126.8, 126.6, 125.9, 123.7, 49.1 (t, *J* = 19.2 Hz), 29.7, 28.7, 27.8; **IR** (NaCl): 3067, 2928, 2854, 1681, 1599, 1455, 1292, 1227, 751, 698 cm<sup>-1</sup>; **HRMS** (ESI): [M + Na]<sup>+</sup> calcd. for C<sub>15</sub>H<sub>13</sub>O<sub>1</sub>D<sub>1</sub>Si<sub>1</sub>Na<sub>1</sub>, 266.0720; found, 266.0721; [α]<sub>D</sub><sup>26</sup> -24.9 (c = 3.03, CHCl<sub>3</sub>).

The enantiomeric purity of the title compound was determined by HPLC analyses (DAICEL CHIRALPAC IE-3 (0.46 cmφ×25 cm), exane : *i*-PrOH = 98 : 2, flow rate = 0.7 mL/min, retention time; 23.5 min (major) and 26.1 min (minor)).

### 2-(3-chloropropyl)-3,4-dihydronaphthalen-1(2H)-one-2-*d* (3f-*d*)

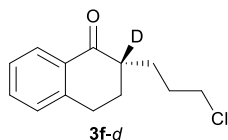

The title compound was prepared following **General procedure**, using 2-(3-chloropropyl)-1-oxo-1,2,3,4-tetrahydronaphthalene-2-carboxylic acid **2f** (80 mg, 0.3 mmol) in *n*-hexane : D<sub>2</sub>O (1 : 1, 1.5 mL) and sodium chloride (100 mg), and the reaction mixture was stirred at 0 °C for 30 min. Then, the reaction mixture was added amine catalyst **1** (68 mg, 0.09 mmol), and stirred at 0 °C for 40 h. The crude product was purified by flash column chromatography (hexane : ethyl acetate = 20 : 1) to provide the title compound as a colorless oil (66 mg, 98% yield, 81% ee, 82% D).

**<sup>1</sup>H NMR** (500 MHz, CDCl<sub>3</sub>): δ 8.02 (dd, *J* = 7.6, 1.2 Hz, 1H), 7.46 (dt, *J* = 7.6, 1.2 Hz, 1H), 7.31 (t, *J* = 7.6 Hz, 1H), 7.24 (d, *J* = 7.6 Hz, 1H), 3.63–3.54 (m, 2H), 3.04–3.00 (m, 2H), 2.26–2.21 (m, 1H), 2.07–2.01 (m, 1H), 1.96–1.88 (m, 3H), 1.72–1.65 (m, 1H); **<sup>13</sup>C NMR** (126 MHz, CDCl<sub>3</sub>): δ 199.8, 143.8, 133.2, 132.4, 128.7, 127.4, 126.6, 46.4 (t, *J* = 19.2 Hz), 45.1, 30.1, 28.5, 28.4, 27.0; **IR** (NaCl): 2931, 2862, 1683, 1601, 1455, 1293, 1228, 935, 764, 738 cm<sup>-1</sup>; **HRMS** (DART): [M + NH<sub>4</sub>]<sup>+</sup> calcd. for C<sub>13</sub>H<sub>18</sub>O<sub>1</sub>N<sub>1</sub>D<sub>1</sub>Cl<sub>1</sub>, 241.1218; found, 241.1218; [α]<sub>D</sub><sup>26</sup> +14.0 (c = 1.77, CHCl<sub>3</sub>).

The enantiomeric purity of the title compound was determined by HPLC analyses (DAICEL CHIRALPAC IF-3 (0.46 cmφ×25 cm), hexane : *i*-PrOH = 150 : 1, flow rate = 0.7 mL/min, retention time; 37.6 min (major) and 40.0 min (minor)).

### 2-hexyl-3,4-dihydronaphthalen-1(2H)-one-2-*d* (3g-*d*)

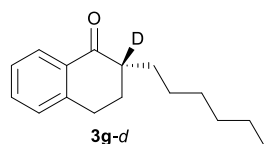

The title compound was prepared following **General procedure**, using 2-hexyl-1-oxo-1,2,3,4-tetrahydronaphthalene-2-carboxylic acid **2g** (94 mg, 0.34 mmol) in *n*-hexane : D<sub>2</sub>O (1 : 1, 3.6 mL) and sodium chloride (516 mg), and the reaction mixture was stirred at 0 °C for 30 min. Then, the reaction

mixture was added amine catalyst **1** (78 mg, 0.10 mmol), and stirred at 0 °C for 66 h. The crude product was purified by flash column chromatography (hexane : ethyl acetate = 20 : 1) to provide the title compound as a colorless oil (63 mg, 79% yield, 88% ee, 87% D).

**<sup>1</sup>H NMR** (500 MHz, CDCl<sub>3</sub>): δ 8.03 (dd, *J* = 7.6, 1.2 Hz, 1H), 7.45 (dt, *J* = 7.6, 1.2 Hz, 1H), 7.30 (t, *J* = 7.6 Hz, 1H), 7.23 (d, *J* = 7.6 Hz, 1H), 3.04–2.93 (m, 2H), 2.27–2.21 (m, 1H), 1.95–1.86 (m, 2H), 1.52–1.21 (m, 9H), 0.90–0.87 (m, 3H); **<sup>13</sup>C NMR** (126 MHz, CDCl<sub>3</sub>): δ 200.5, 143.9, 133.0, 132.5, 128.6, 127.4, 126.5, 46.9 (t, *J* = 19.2 Hz), 31.7, 29.4, 29.2, 28.1, 28.0, 26.9, 22.6, 14.1; **IR** (NaCl): 2953, 2926, 2857, 1685, 1602, 1455, 1296, 1227, 764, 739 cm<sup>-1</sup>; **HRMS** (DART): [M + H]<sup>+</sup> calcd. for C<sub>16</sub>H<sub>22</sub>O<sub>1</sub>D<sub>1</sub>, 232.1812; found, 232.1812; [α]<sub>D</sub><sup>24</sup> +12.4 (c = 2.13, CHCl<sub>3</sub>).

The enantiomeric purity of the title compound was determined by HPLC analyses (DAICEL CHIRALPAC IF-3 (0.46 cmφ×25 cm), hexane : *i*-PrOH = 150 : 1, flow rate = 1.0 mL/min, retention time; 10.3 min (minor) and 11.0 min (major)).

### 2-methyl-2,3-dihydro-1H-inden-1-one-2-*d* (**3h-d**)

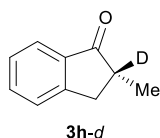

The title compound was prepared following **General procedure**, using 2-methyl-1-oxo-2,3-dihydro-1H-indene-2-carboxylic acid **2h** (57 mg, 0.3 mmol) in *n*-hexane : D<sub>2</sub>O (1 : 1, 1.5 mL), and the reaction mixture was stirred at 15 °C for 30 min. Then, the reaction mixture was added amine catalyst **1** (68 mg, 0.09 mmol), and stirred at 15 °C for 2.5 h. The crude product was purified by flash column chromatography (hexane : diethyl ether = 8 : 1) to provide the title compound as a colorless oil (33 mg, 74% yield, 60% ee, 87% D).

**<sup>1</sup>H NMR** (500 MHz, CDCl<sub>3</sub>): δ 7.76 (d, *J* = 7.6 Hz, 1H), 7.58 (t, *J* = 7.6 Hz, 1H), 7.45 (t, *J* = 7.6 Hz, 1H), 7.37 (t, *J* = 7.6 Hz, 1H), 3.39 (d, *J* = 17.2 Hz, 1H), 2.73 (d, *J* = 17.2 Hz, 1H), 1.31 (s, 3H); **<sup>13</sup>C NMR** (126 MHz, CDCl<sub>3</sub>): δ 209.5, 153.5, 136.3, 134.7, 127.3, 126.5, 123.9, 41.5 (t, *J* = 19.2 Hz), 34.8, 16.2; **IR** (NaCl): 2927, 1713, 1609, 1465, 1327, 1283, 993, 766, 738, 715 cm<sup>-1</sup>; **HRMS** (ESI): [M + Na]<sup>+</sup> calcd. for C<sub>10</sub>H<sub>9</sub>O<sub>1</sub>D<sub>1</sub>Na<sub>1</sub>, 170.0687; found, 170.0687; [α]<sub>D</sub><sup>26</sup> -30.2 (c = 0.55, CHCl<sub>3</sub>).

The enantiomeric purity of the title compound was determined by HPLC analyses (DAICEL CHIRALCEL OJ-H (0.46 cmφ×25 cm), hexane : *i*-PrOH = 9 : 1, flow rate = 0.5 mL/min, retention time; 11.8 min (minor) and 12.5 min (major)).

### 2-benzylcyclohexan-1-one-2-*d* (**3i-d**)

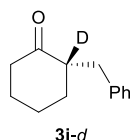

The title compound was prepared following **General procedure**, using 1-benzyl-2-oxocyclohexane-1-carboxylic acid **2i** (61 mg, 0.26 mmol) and amine catalyst **1** (60 mg, 0.08 mmol) in *n*-hexane : D<sub>2</sub>O (1 : 1, 1.3 mL), and the reaction mixture was stirred at room temperature for 1.5 h. The crude product

was purified by flash column chromatography (hexane : diethyl ether = 15 : 1) to provide the title compound as a yellow oil (21mg, 43% yield, 22% ee, 73% D).

**<sup>1</sup>H NMR** (500 MHz, CDCl<sub>3</sub>): δ 7.29–7.26 (m, 2H), 7.20–7.15 (m, 3H), 3.22 (d, *J* = 14.1 Hz, 1H), 2.46–2.39 (m, 2H), 2.36–2.29 (m, 1H), 2.09–2.00 (m, 2H), 1.85–1.80 (m, 1H), 1.73–1.53 (m, 2H), 1.39–1.31 (m, 1H); **<sup>13</sup>C NMR** (126 MHz, CDCl<sub>3</sub>): δ 212.6, 140.3, 129.1, 128.2, 52.0 (t, *J* = 19.2 Hz), 42.1, 35.3, 33.3, 28.0, 25.0; **IR** (NaCl): 2936, 2859, 1709, 1605, 1496, 1451, 1128, 730, 700, 512 cm<sup>-1</sup>; **HRMS** (ESI): [M + Na]<sup>+</sup> calcd. for C<sub>13</sub>H<sub>15</sub>O<sub>1</sub>Na<sub>1</sub>D<sub>1</sub>, 212.1156; found, 212.1150; [α]<sub>D</sub><sup>24</sup> –6.8 (c = 0.85, CHCl<sub>3</sub>). The enantiomeric purity of the title compound was determined by HPLC analyses (DAICEL CHIRALCEL OJ-H (0.46 cmφ×25 cm), hexane : *i*-PrOH = 98 : 2, flow rate = 1.0 mL/min, retention time; 10.2 min (minor) and 11.4 min (major)).

### 1,2-diphenylpropan-1-one-2-*d* (3k-*d*)

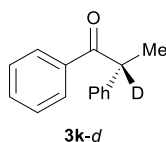

The title compound was prepared following **General procedure**, using 2-methyl-3-oxo-2,3-diphenylpropanoic acid **2k** (64 mg, 0.25 mmol) and amine catalyst **1** (57 mg, 0.08 mmol) in *n*-hexane : D<sub>2</sub>O (1 : 1, 1.3 mL), and the reaction mixture was stirred at room temperature for 6 h. The crude product was purified by flash column chromatography (hexane : ethyl acetate = 20 : 1) to provide the title compound as a colorless oil (33mg, 62% yield, 23% ee, 93% D).

**<sup>1</sup>H NMR** (500 MHz, CDCl<sub>3</sub>): δ 7.96–7.94 (m, 2H), 7.49–7.46 (m, 1H), 7.40–7.37 (m, 2H), 7.30–7.29 (m, 4H), 7.23–7.18 (m, 1H), 1.53 (s, 3H); **<sup>13</sup>C NMR** (126 MHz, CDCl<sub>3</sub>): δ 200.3, 141.4, 136.4, 132.7, 128.9, 128.7, 128.4, 127.7, 126.8, 47.4 (t, *J* = 19.2 Hz), 19.4; **IR** (NaCl): 2975, 2931, 1682, 1597, 1447, 1263, 976, 739, 696, 559 cm<sup>-1</sup>; **HRMS** (ESI): [M + Na]<sup>+</sup> calcd. for C<sub>15</sub>H<sub>13</sub>O<sub>1</sub>Na<sub>1</sub>D<sub>1</sub>, 234.1000; found, 234.0995; [α]<sub>D</sub><sup>24</sup> –39.1 (c = 0.45, CHCl<sub>3</sub>).

The enantiomeric purity of the title compound was determined by HPLC analyses (DAICEL CHIRALCEL OJ-H (0.46 cmφ×25 cm), hexane : *i*-PrOH = 99 : 1, flow rate = 1.0 mL/min, retention time; 18.5 min (minor) and 21.2 min (major)).

## 6. References

1. M. Leolukman, P. Paoprasert, Y. Wang, V. Makhija, D. J. McGee and P. Gopalan, *Macromolecules*, 2008, **41**, 4651.
2. M. Schönleber, R. Hilgraf and A. Pfaltz, *Adv. Synth. Catal.*, 2008, **350**, 2033.
3. K. Shibatomi, K. Kitahara, T. Okimi, Y. Abe and S. Iwasa, *Chem. Sci.*, 2016, **7**, 1388.
4. K. Shibatomi, K. Kitahara, N. Sasaki, Y. Kawasaki, I. Fuzisawa and S. Iwasa, *Nat. Commun.*, 2017, **8**, 15600.
5. A. Yanagisawa, T. Sugita and K. Yoshida, *Chem. Eur. J.*, 2013, **19**, 16200.
6. a) M. Biosca, A. Paptchikhine, O. Pàmies, P. G. Andersson and M. Diéguez, *Chem. Eur. J.*, 2015, **21**, 3455; b) S.-M. Lu and C. Bolm, *Angew. Chem. Int. Ed.*, 2008, **47**, 8920.
7. S. Lou and G. C. Fu, *J. Am. Chem. Soc.*, 2010, **132**, 1264.
8. J. Eames, N. Weerasooriya and G. C. Coumbarides, *Eur. J. Org. Chem.*, 2002, 181.

## 7. NMR spectra

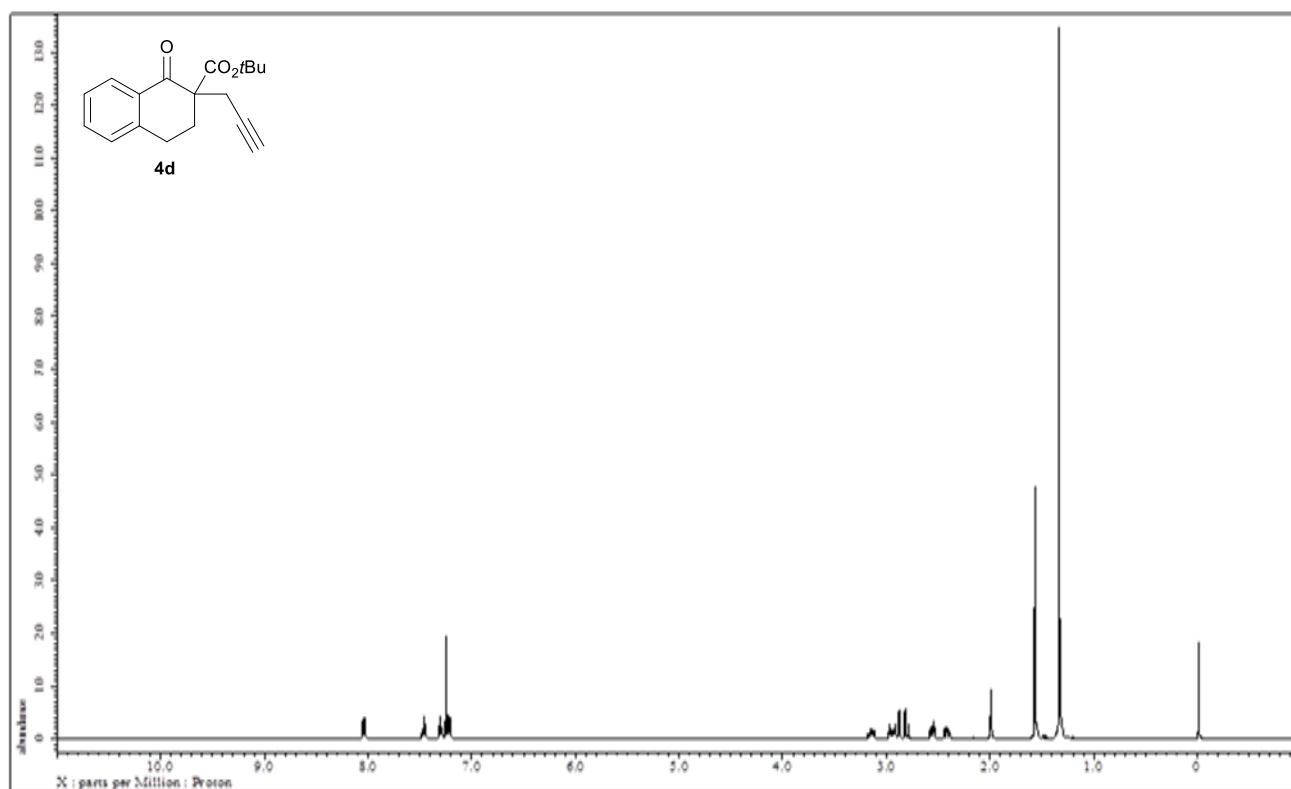

Supplementary figure 1. <sup>1</sup>H NMR spectrum for  $\beta$ -ketoester 4d

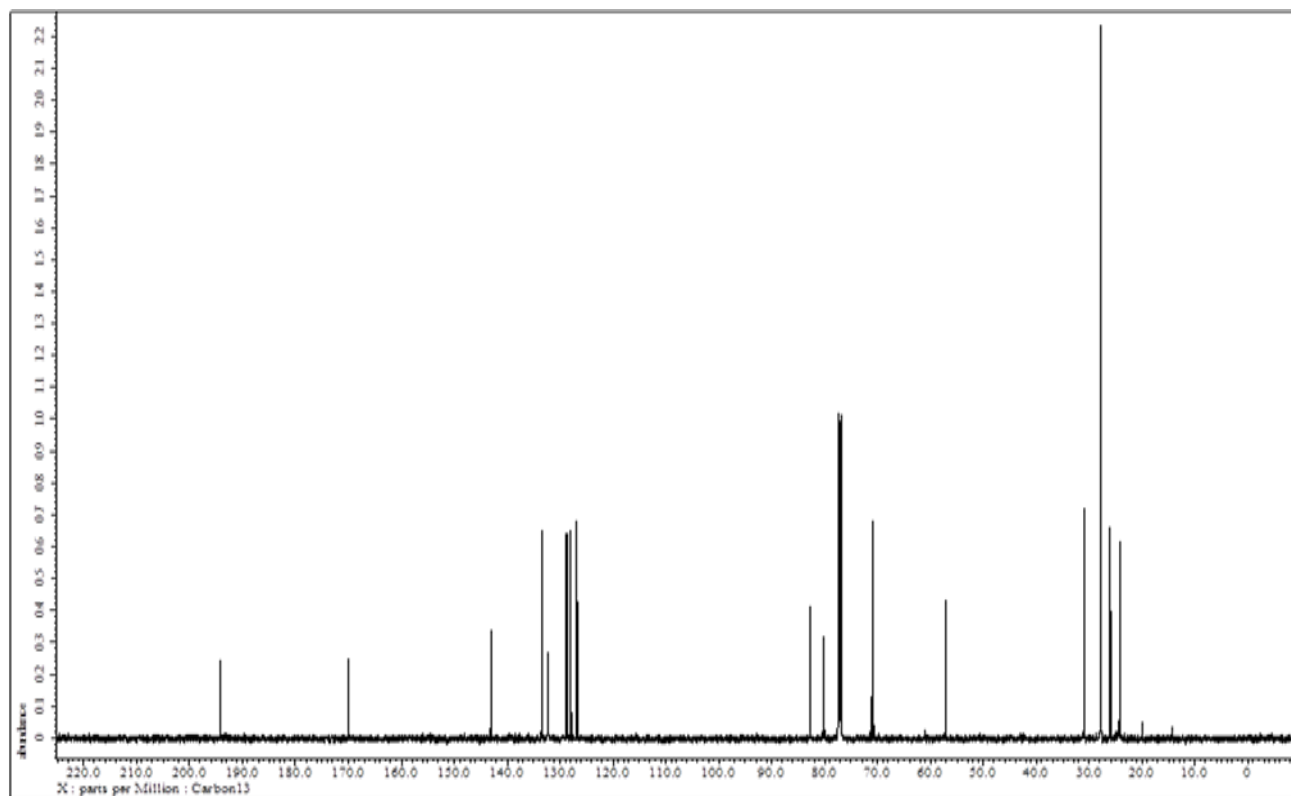

Supplementary figure 2. <sup>13</sup>C NMR spectrum for  $\beta$ -ketoester 4d

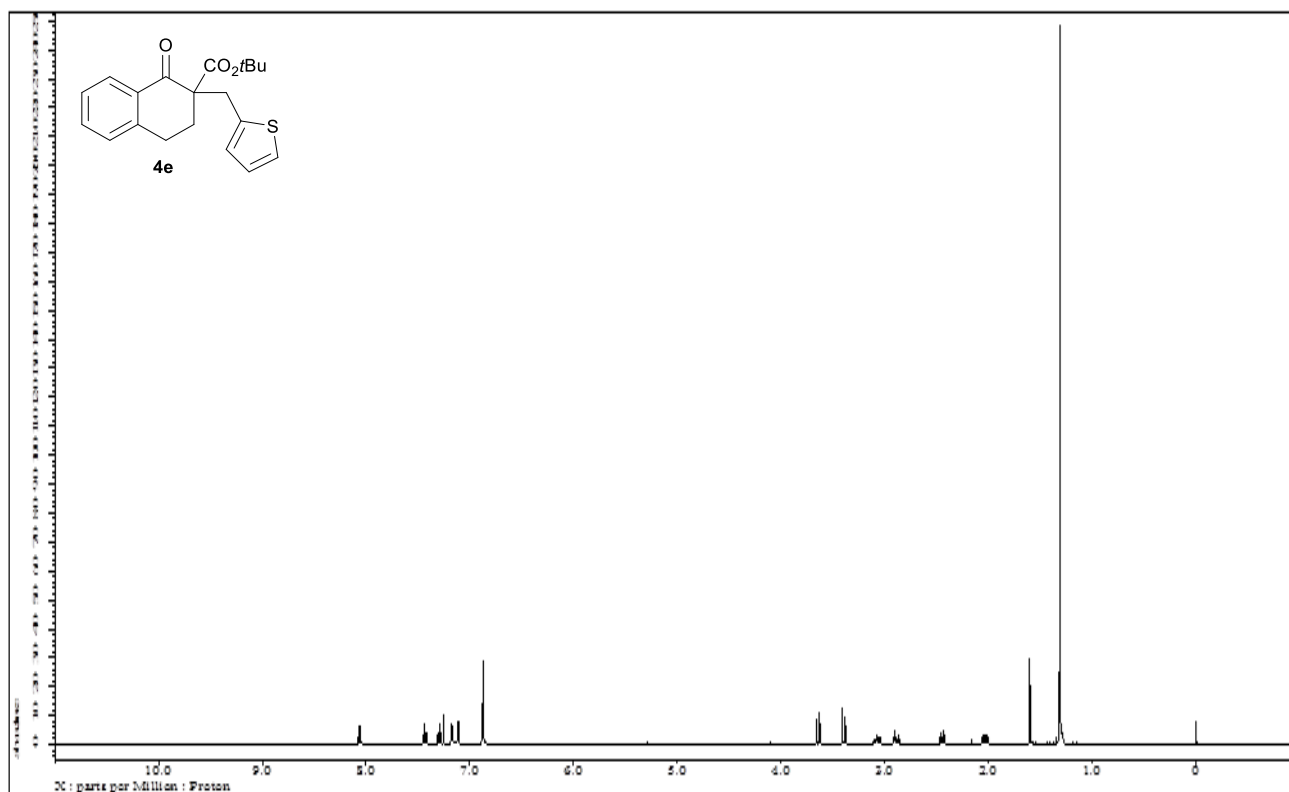

Supplementary figure 3.  $^1\text{H}$  NMR spectrum for  $\beta$ -ketoester **4e**

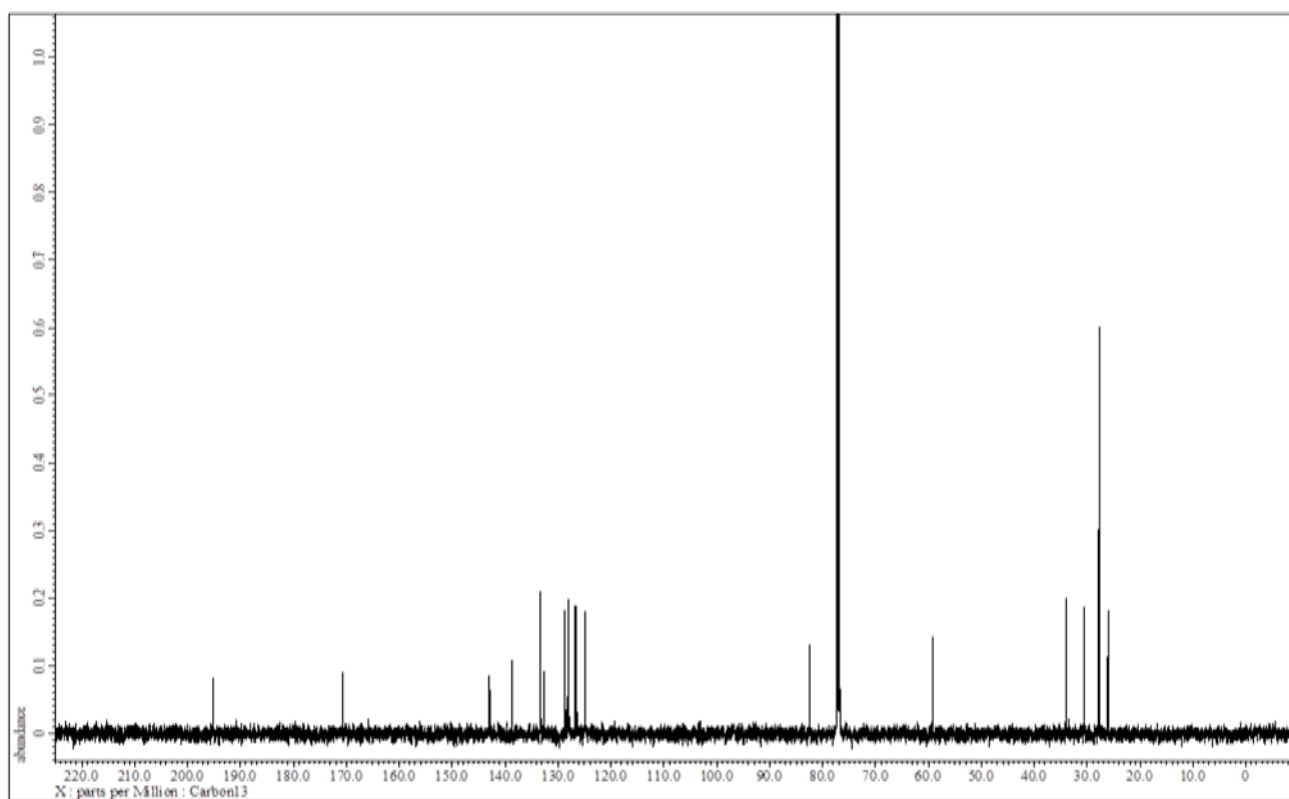

Supplementary figure 4.  $^{13}\text{C}$  NMR spectrum for  $\beta$ -ketoester **4e**

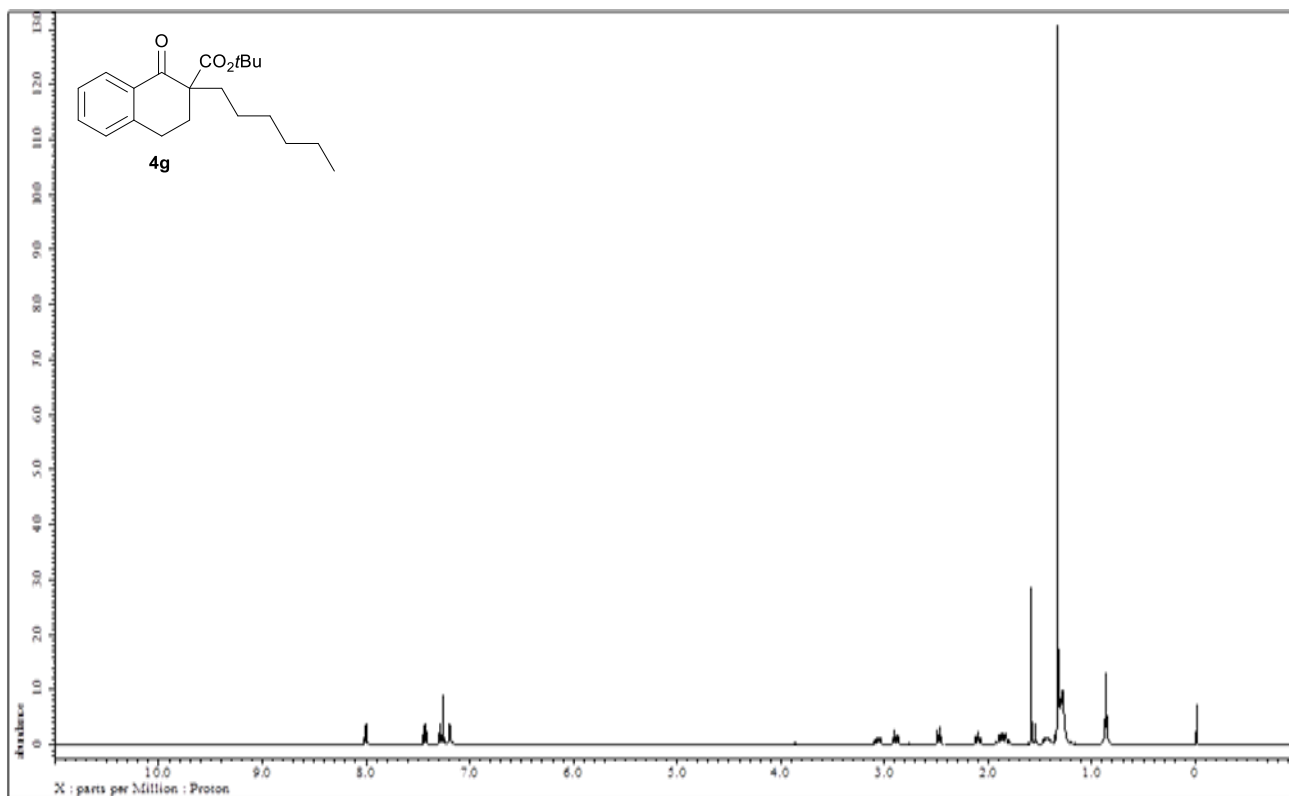

Supplementary figure 5. <sup>1</sup>H NMR spectrum for  $\beta$ -ketoester 4g

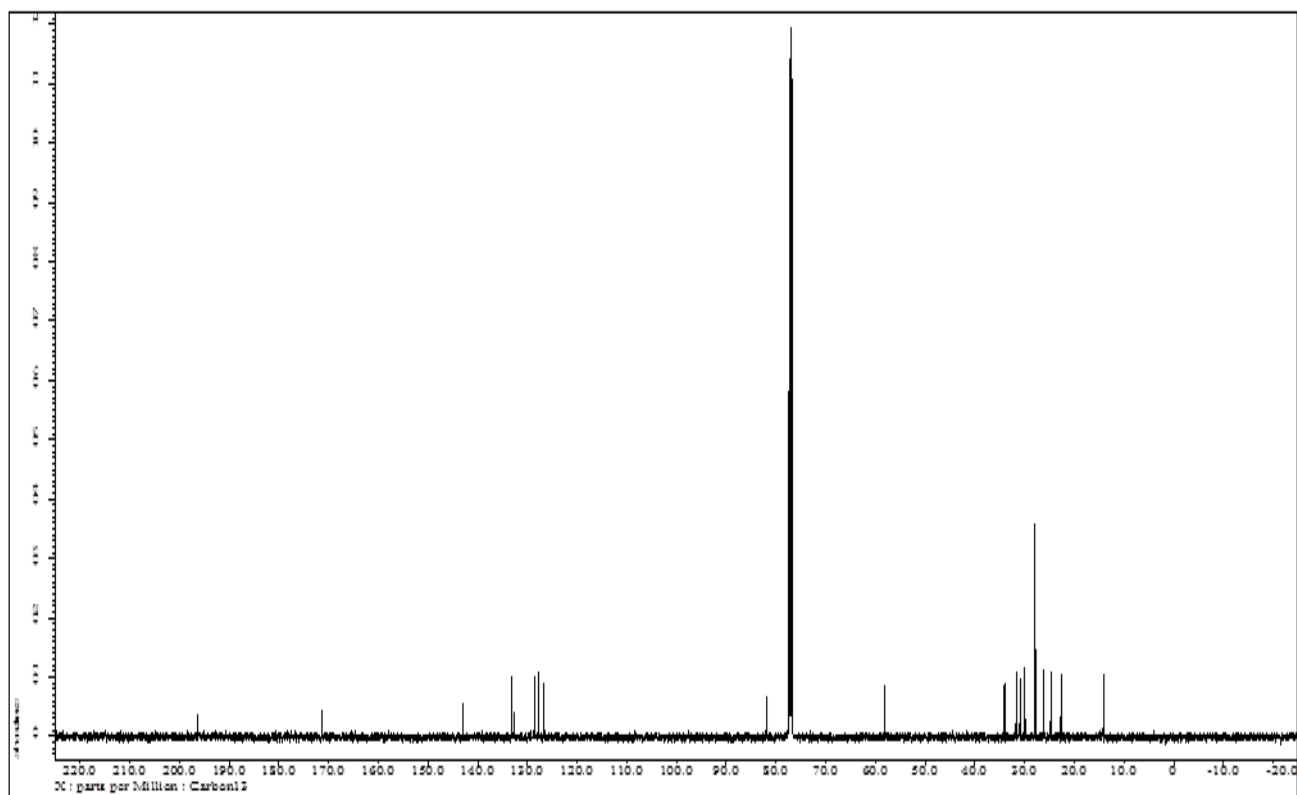

Supplementary figure 6. <sup>13</sup>C NMR spectrum for  $\beta$ -ketoester 4g

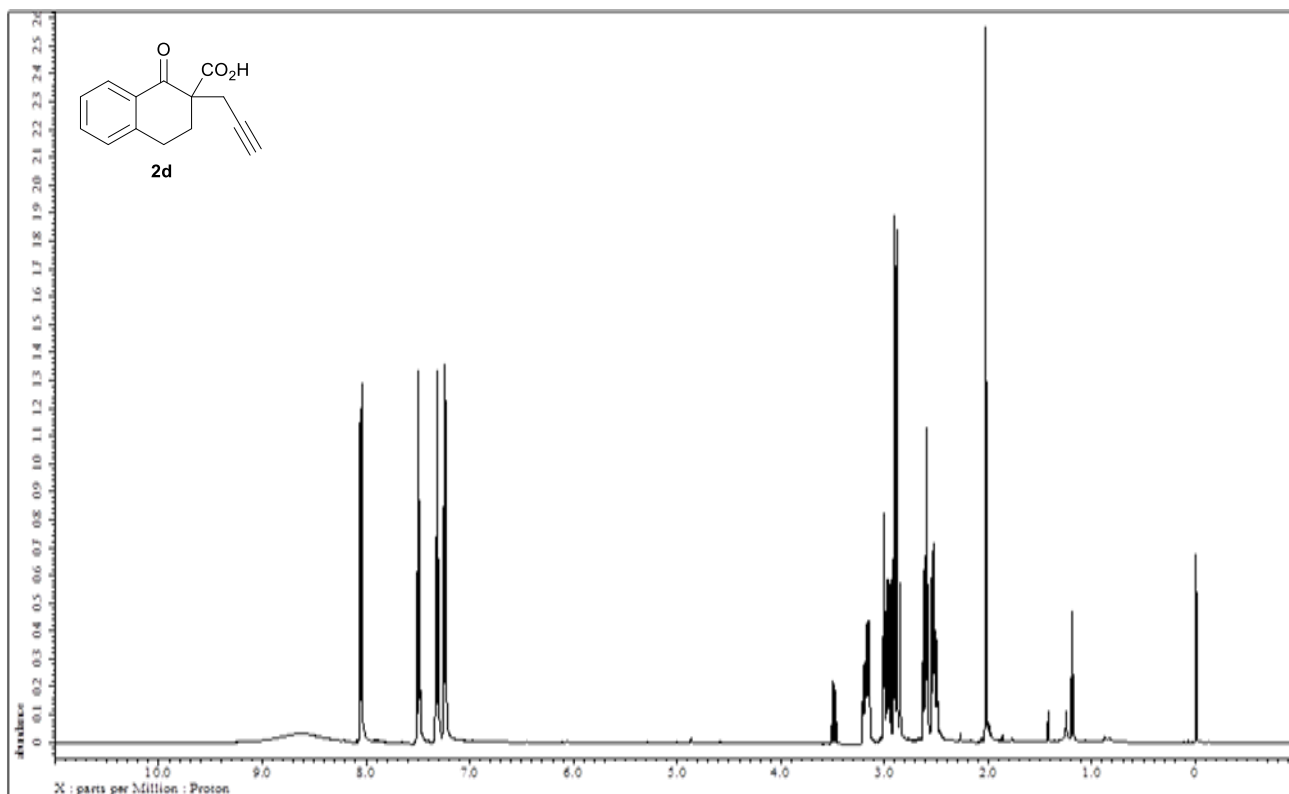

Supplementary figure 7. <sup>1</sup>H NMR spectrum for β-ketocarboxylic acid 2d

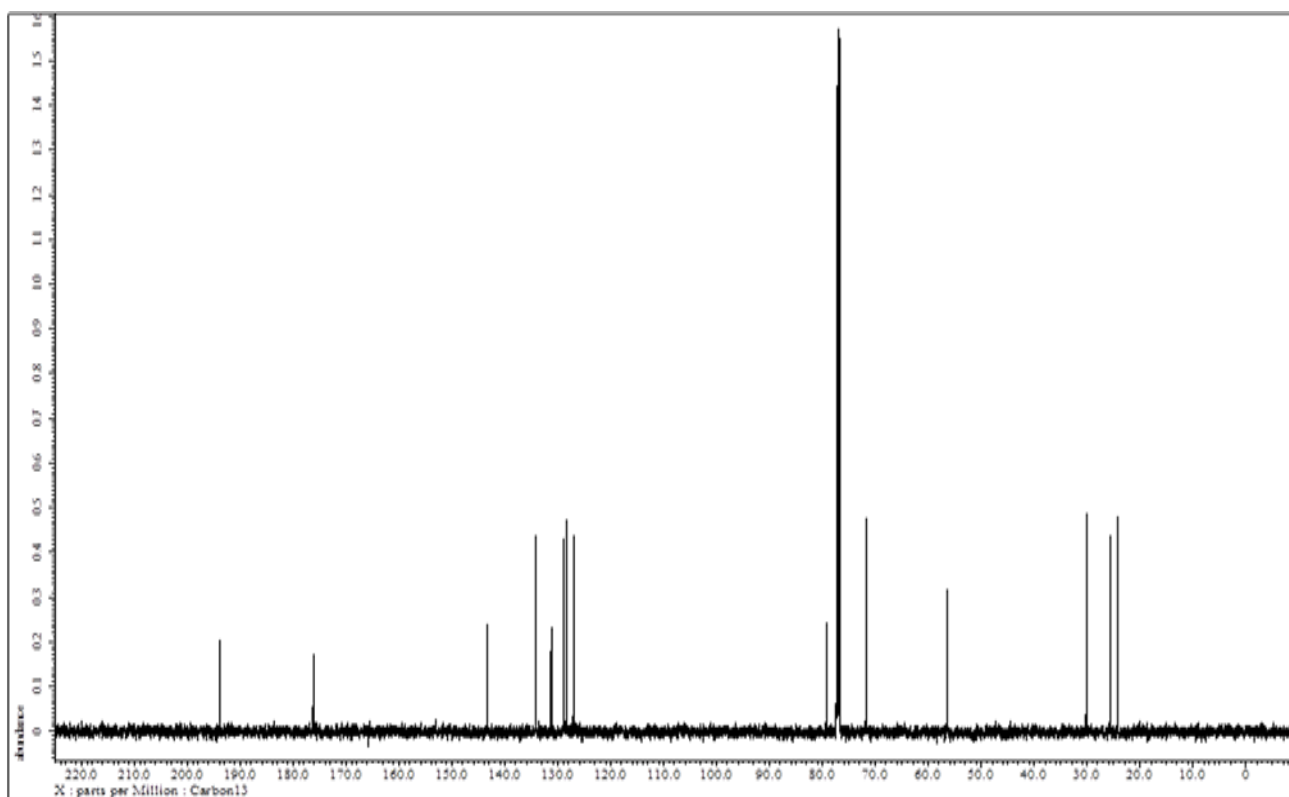

Supplementary figure 8. <sup>13</sup>C NMR spectrum for β-ketocarboxylic acid 2d



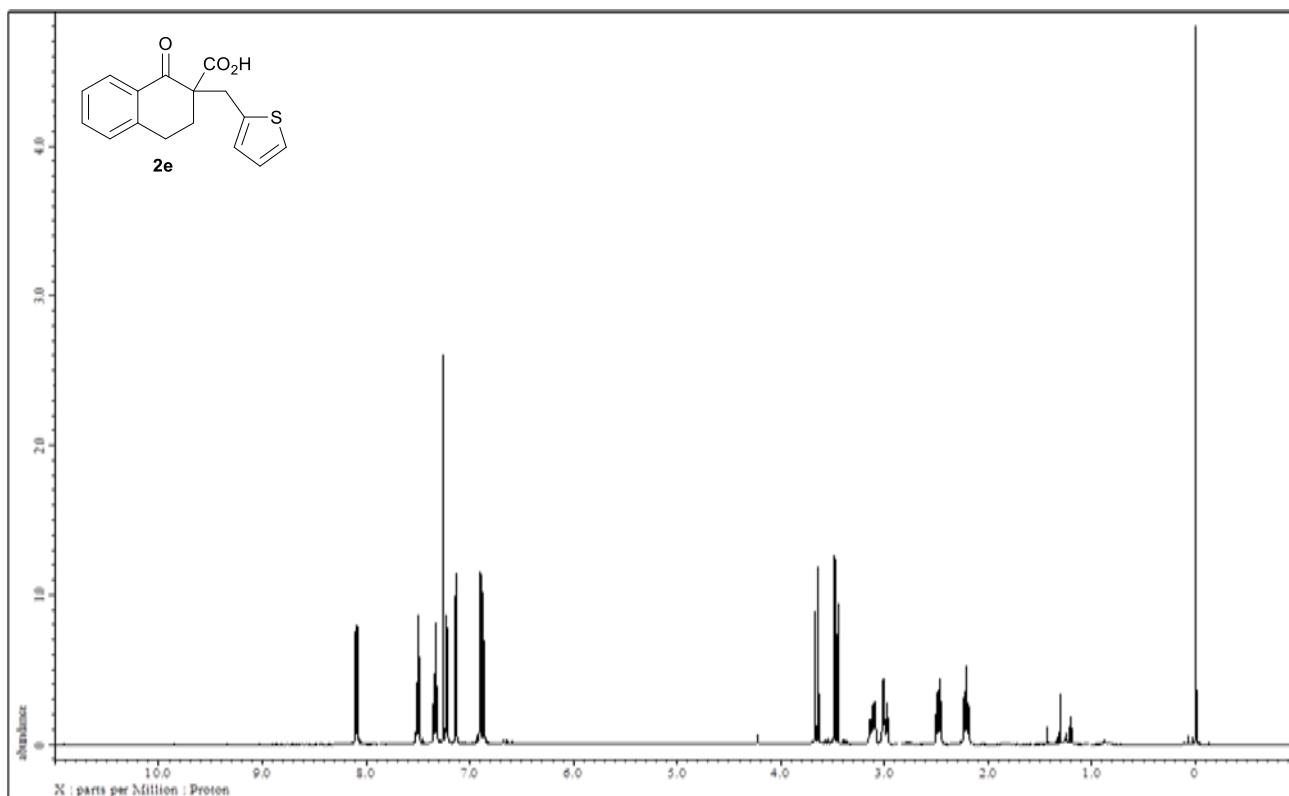

Supplementary figure 9. <sup>1</sup>H NMR spectrum for β-ketocarboxylic acid 2e

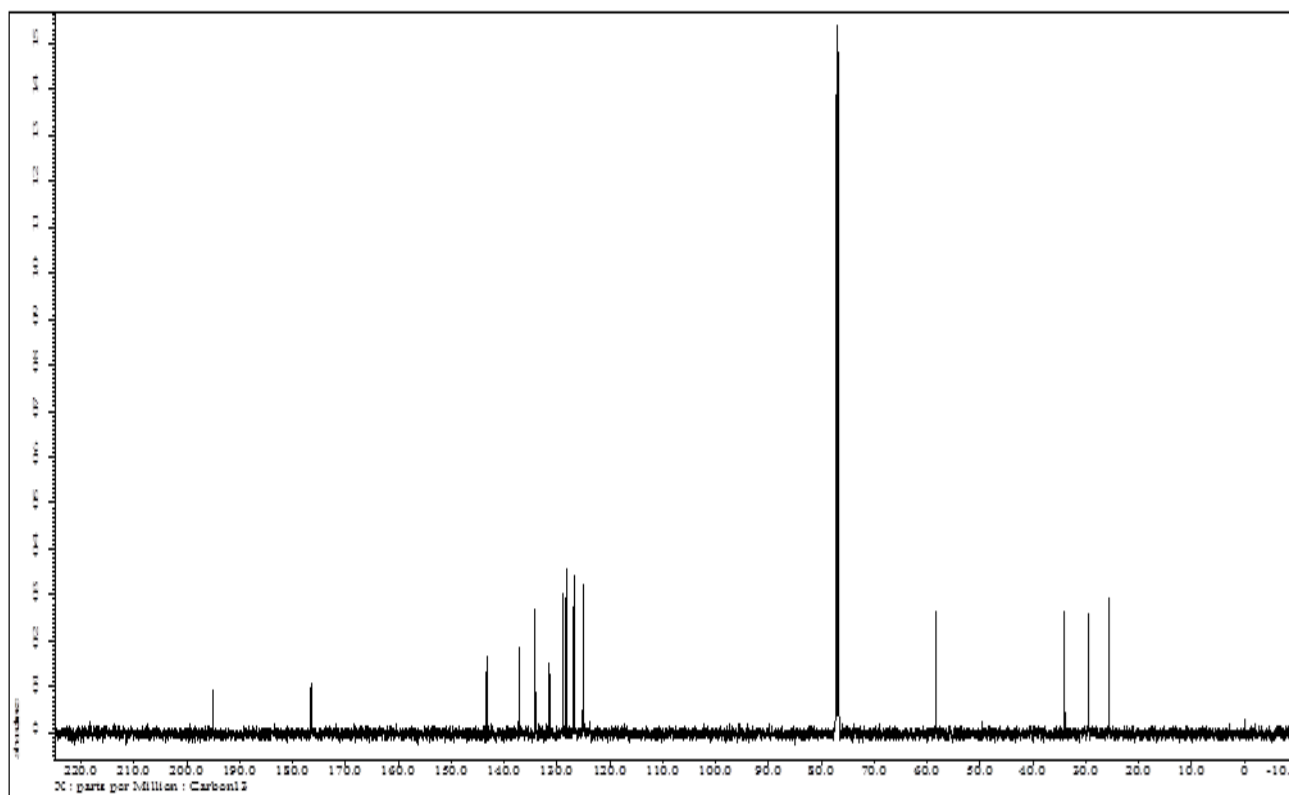

Supplementary figure 10. <sup>13</sup>C NMR spectrum for β-ketocarboxylic acid 2e

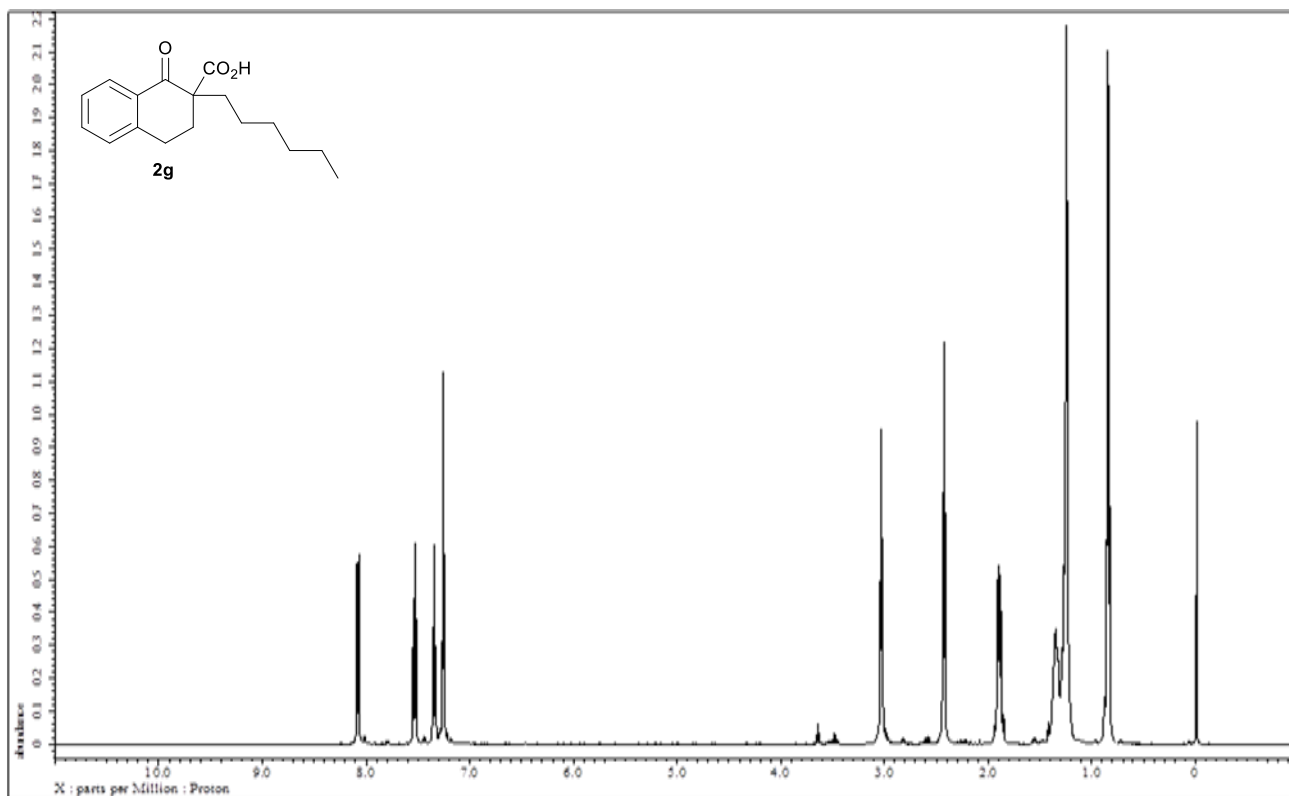

Supplementary figure 11. <sup>1</sup>H NMR spectrum for  $\beta$ -ketocarboxylic acid **2g**

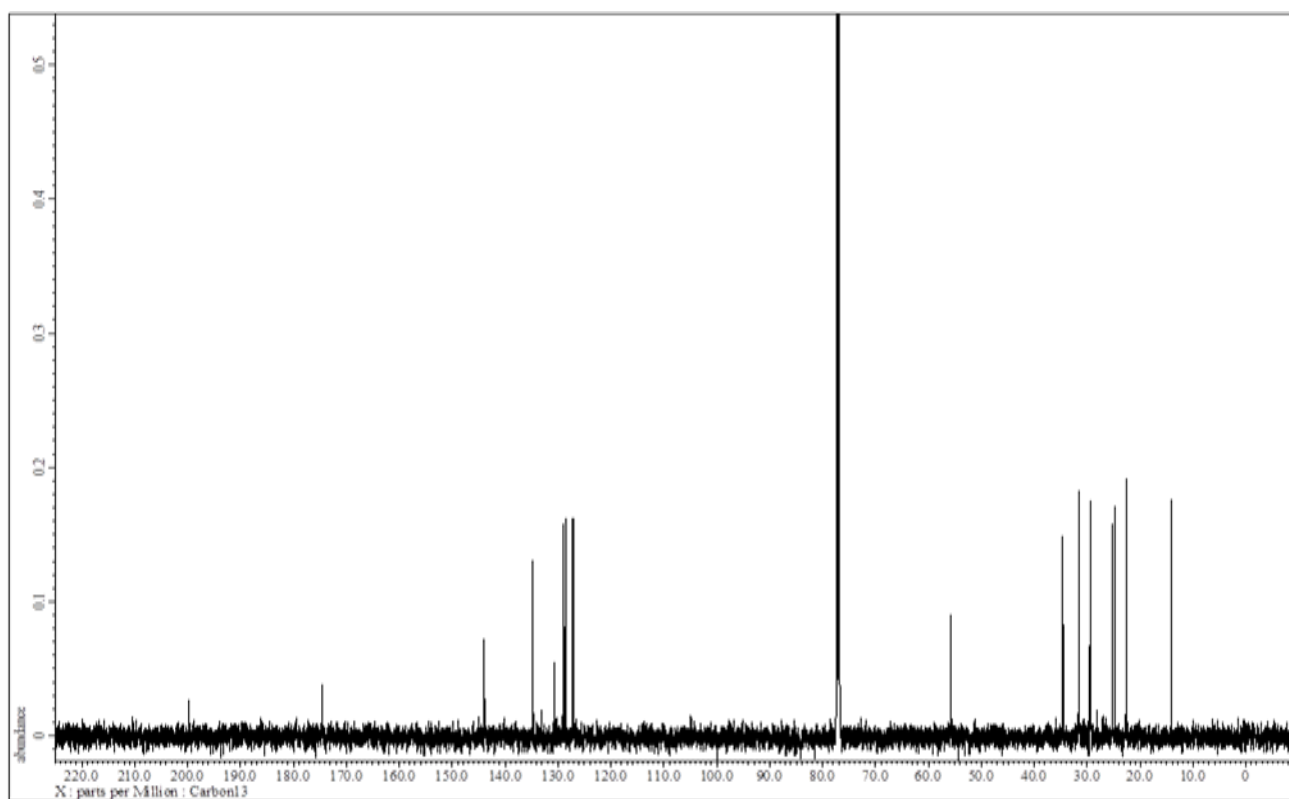

Supplementary figure 12. <sup>13</sup>C NMR spectrum for  $\beta$ -ketocarboxylic acid **2g**

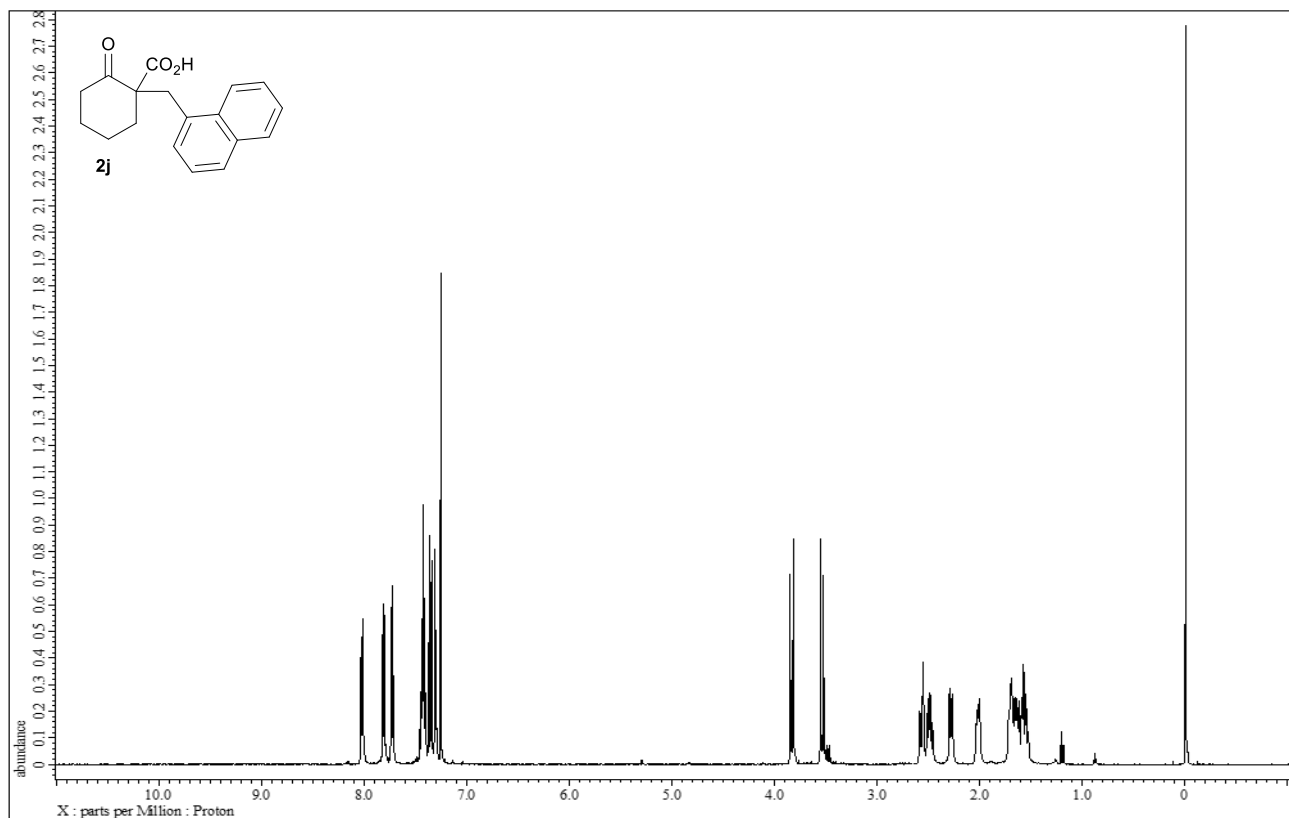

Supplementary figure 13. <sup>1</sup>H NMR spectrum for  $\beta$ -ketocarboxylic acid 2j

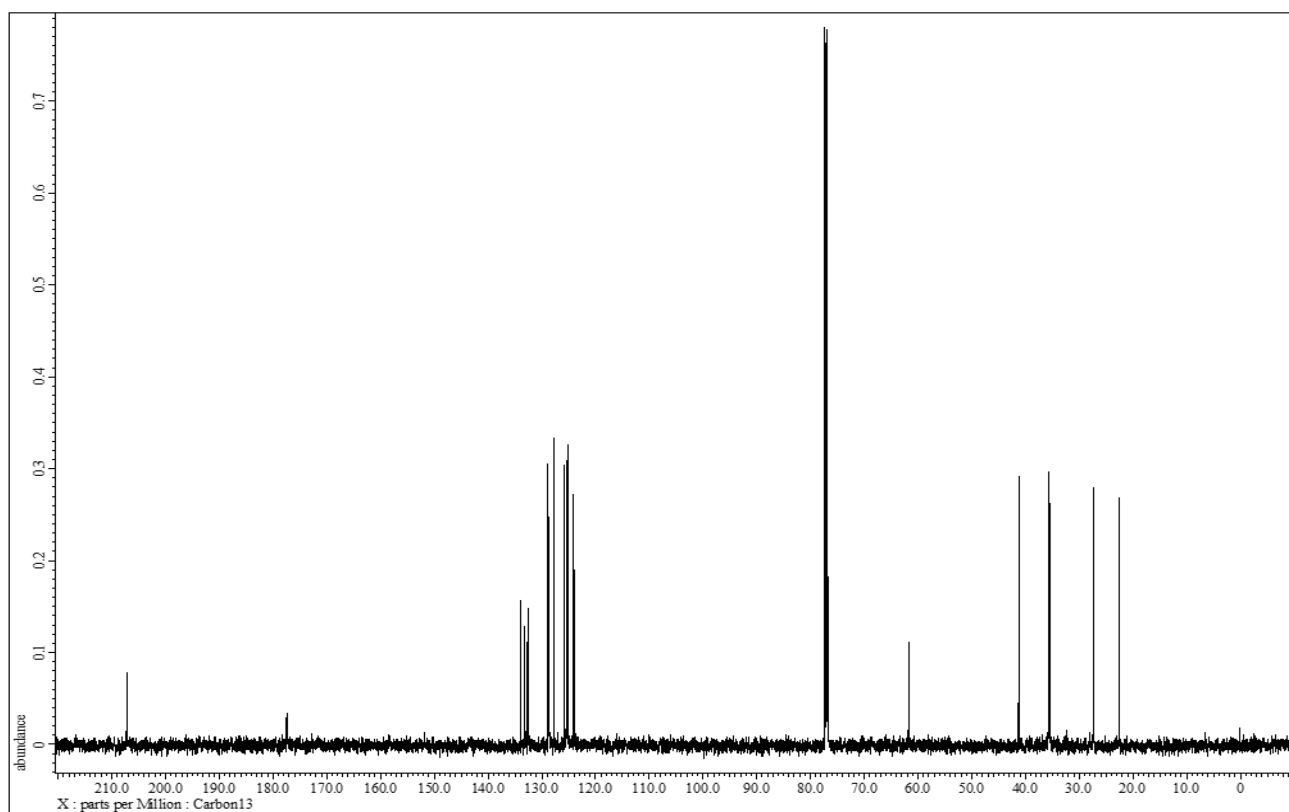

Supplementary figure 14. <sup>13</sup>C NMR spectrum for  $\beta$ -ketocarboxylic acid 2j

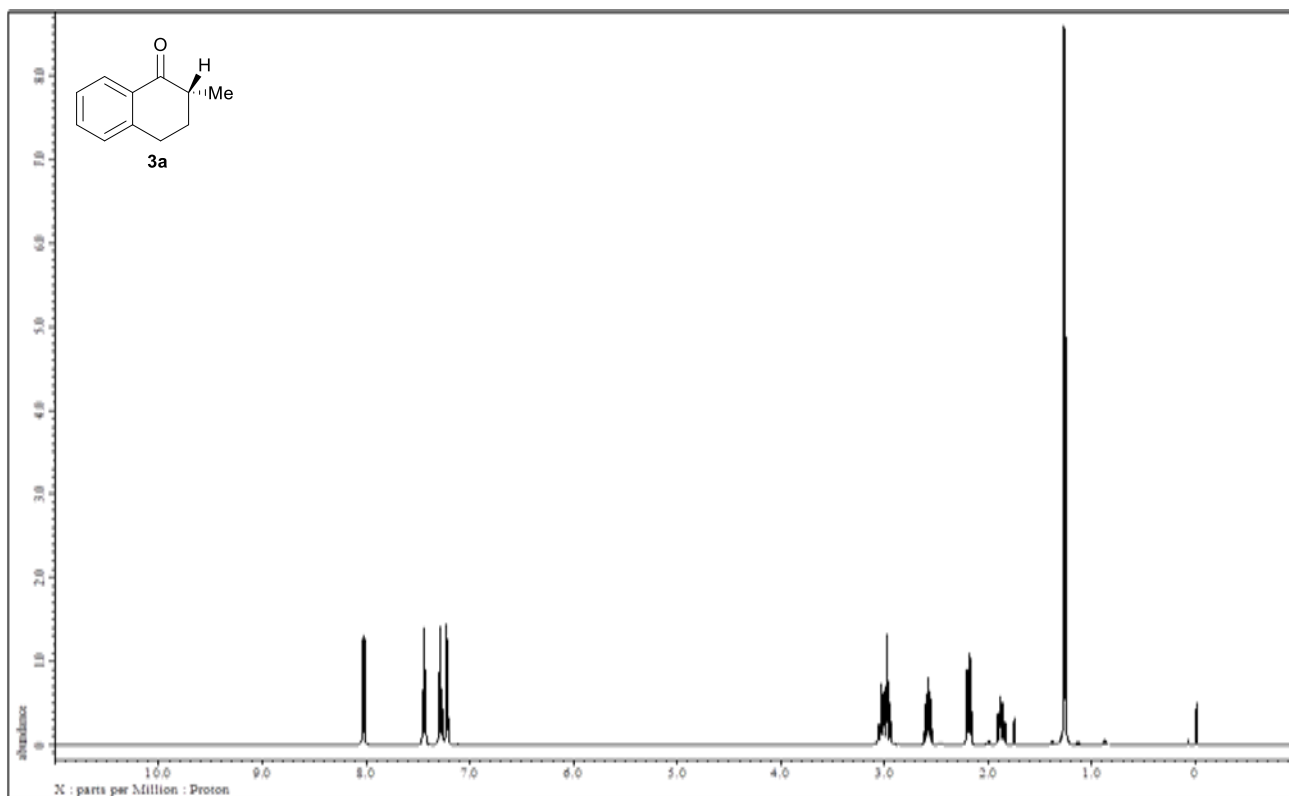

Supplementary figure 15. <sup>1</sup>H NMR spectrum for 3a

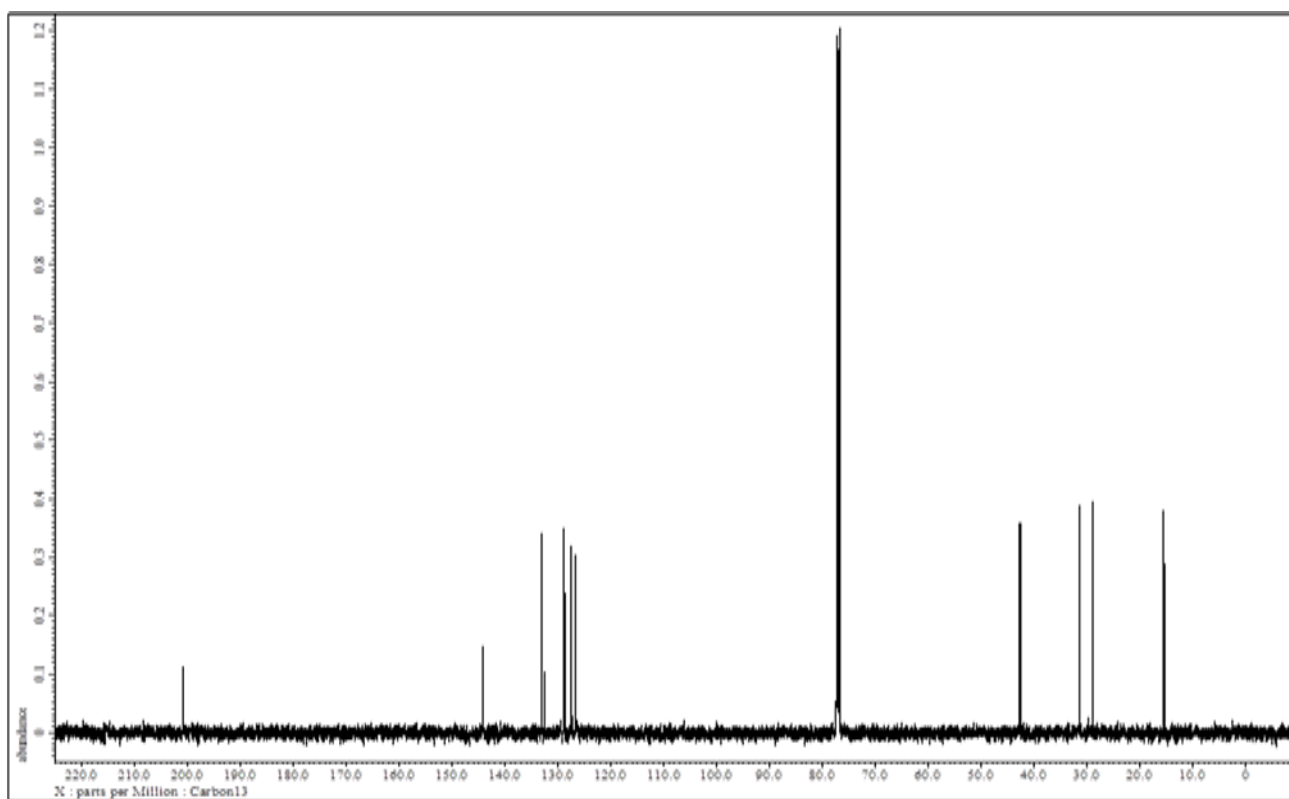

Supplementary figure 16. <sup>13</sup>C NMR spectrum for 3a

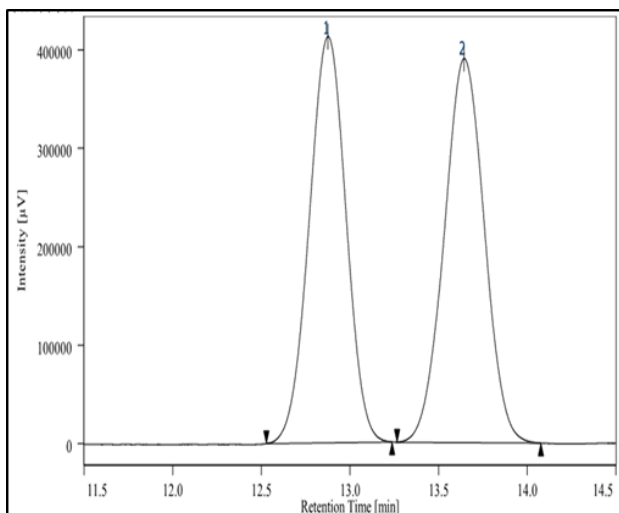

| Peak | Retention Time [min] | Area [%] |
|------|----------------------|----------|
| 1    | 12.875               | 49.168   |
| 2    | 13.642               | 50.832   |

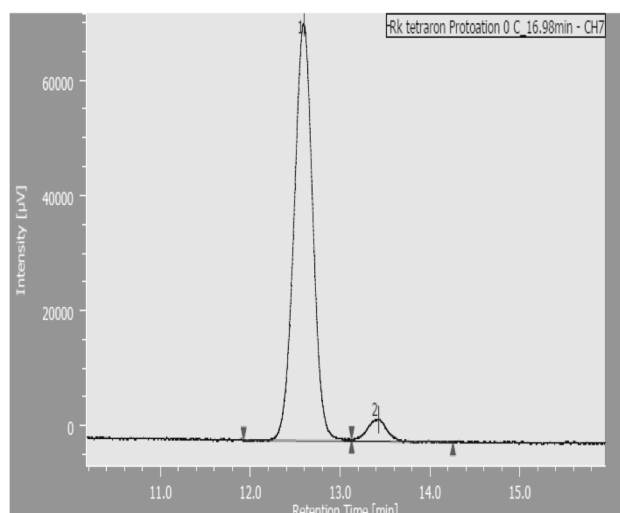

| # | ピーク名    | CH | tR [min] | 面積 [μV·sec] | 高さ [μV] | 面積%    | 高さ%    |
|---|---------|----|----------|-------------|---------|--------|--------|
| 1 | Unknown | 7  | 12.595   | 1054287     | 72531   | 94.619 | 94.997 |
| 2 | Unknown | 7  | 13.425   | 59955       | 3820    | 5.381  | 5.003  |

Supplementary figure 17. HPLC spectra for 3a

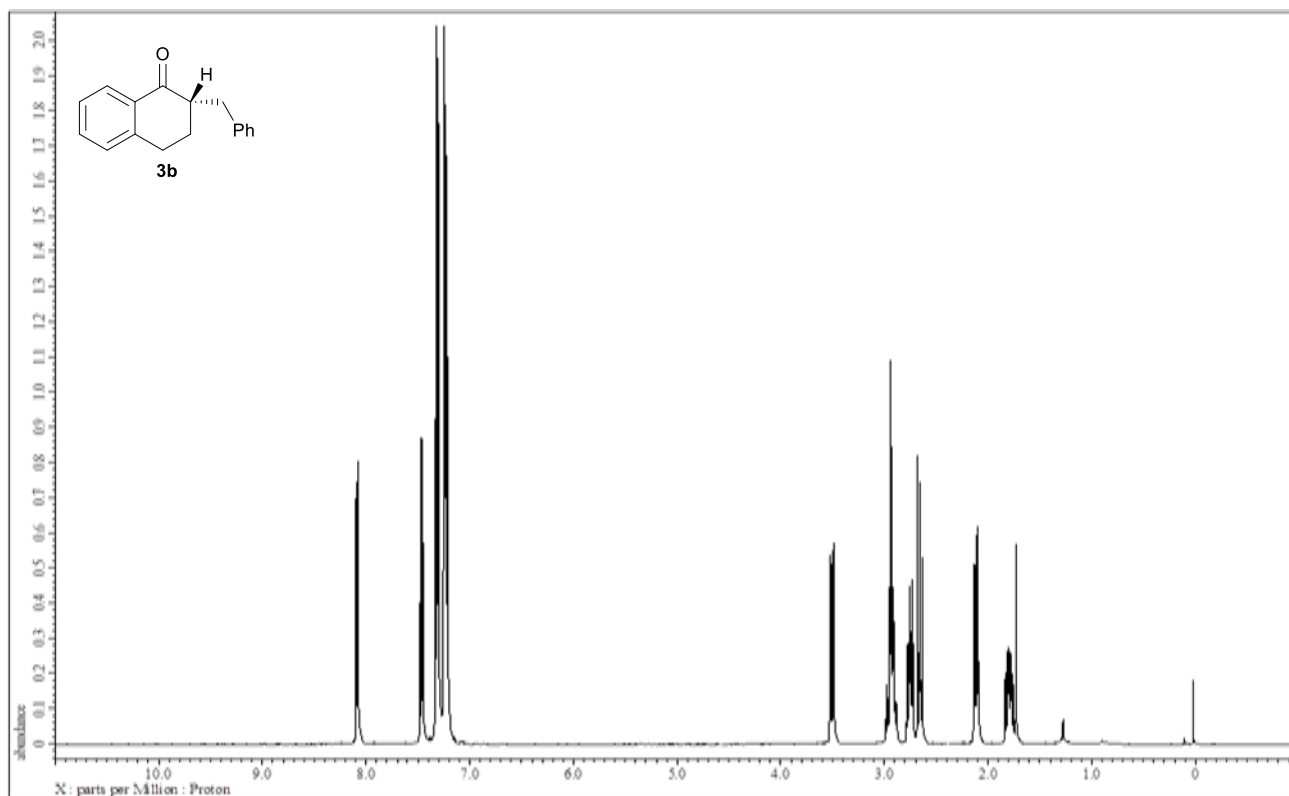

Supplementary figure 18. <sup>1</sup>H NMR spectrum for 3b

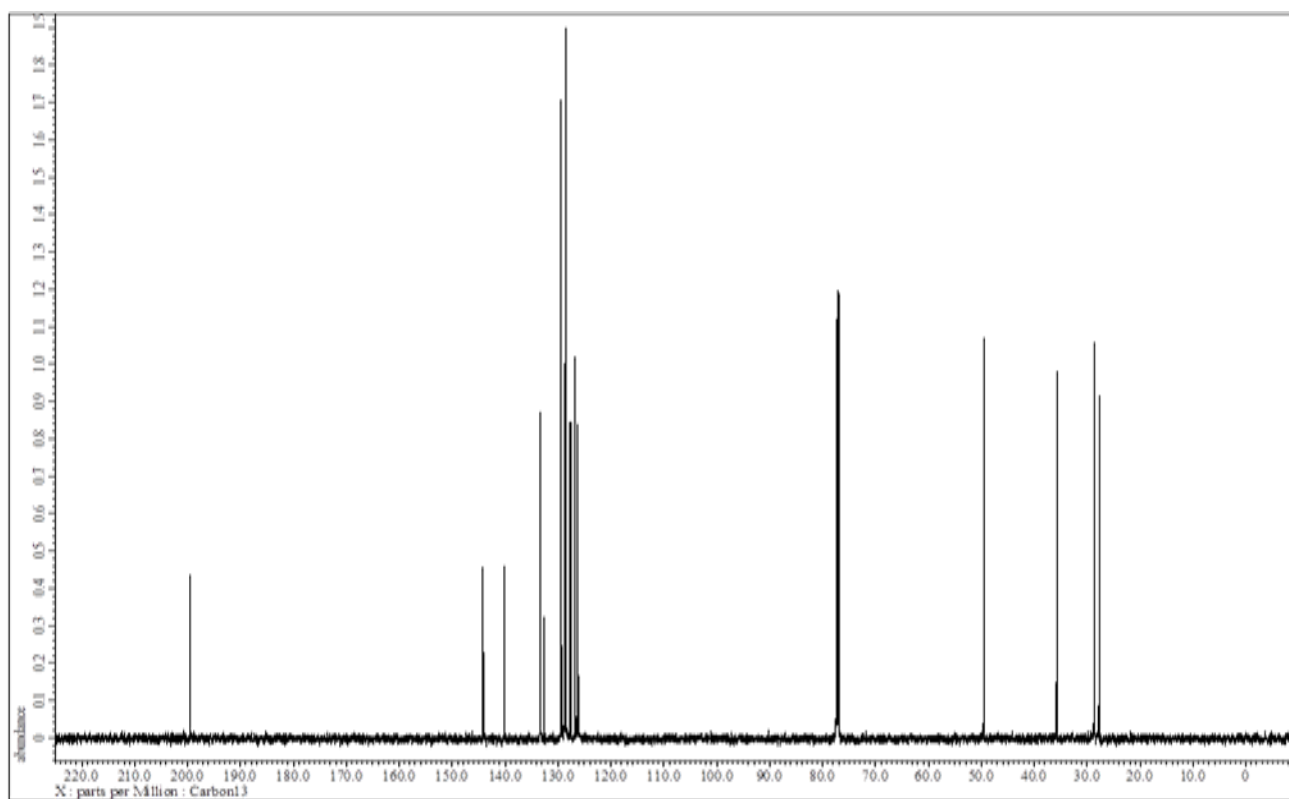

Supplementary figure 19. <sup>13</sup>C NMR spectrum for 3b

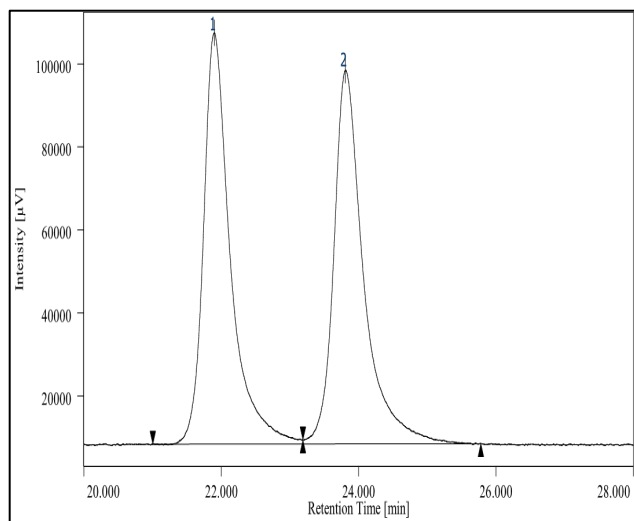

| Peak | Retention Time [min] | Area [%] |
|------|----------------------|----------|
| 1    | 22.170               | 18.964   |
| 2    | 23.982               | 81.036   |

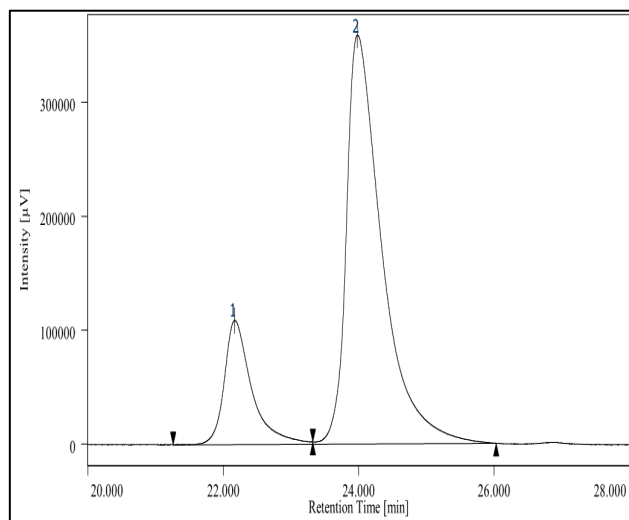

| Peak | Retention Time [min] | Area [%] |
|------|----------------------|----------|
| 1    | 21.902               | 49.880   |
| 2    | 23.807               | 50.120   |

**Supplementary figure 20. HPLC spectra for 3b**

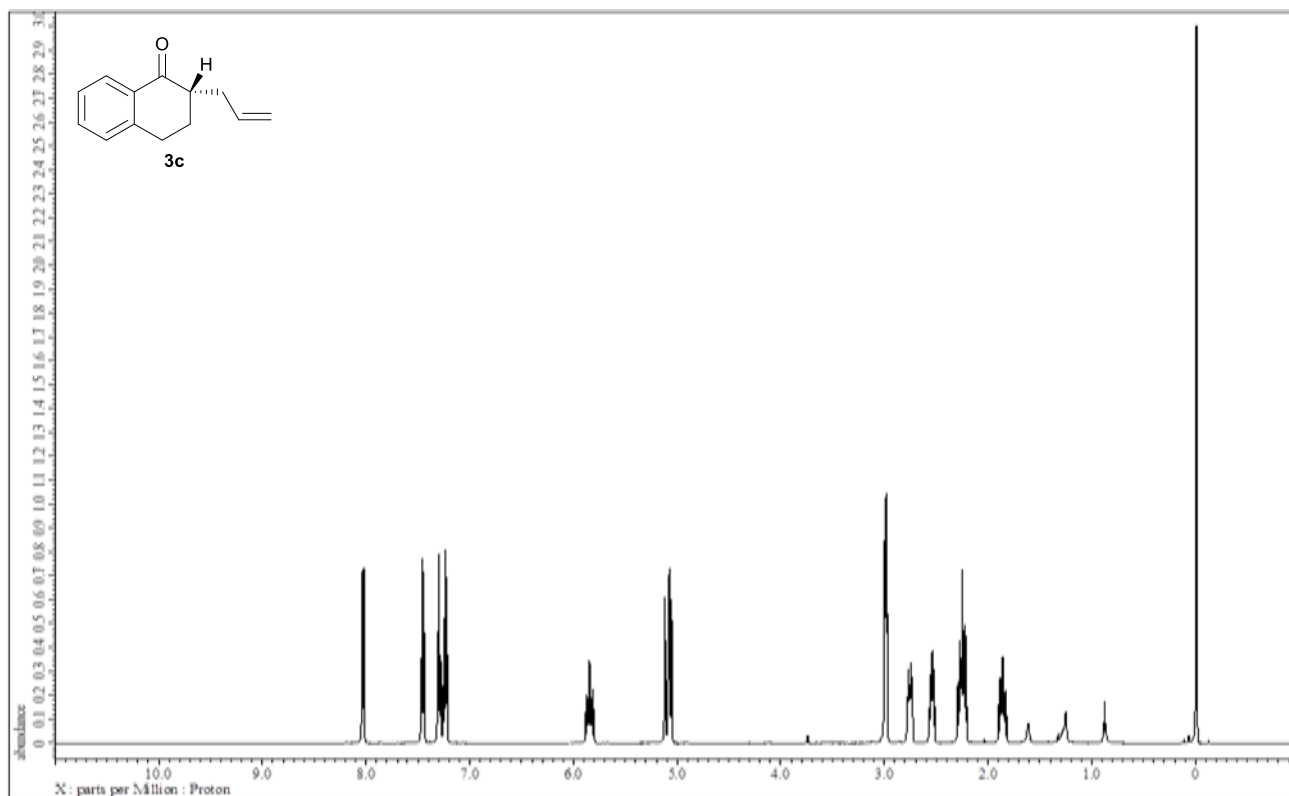

Supplementary figure 21.  $^1\text{H}$  NMR spectrum for **3c**

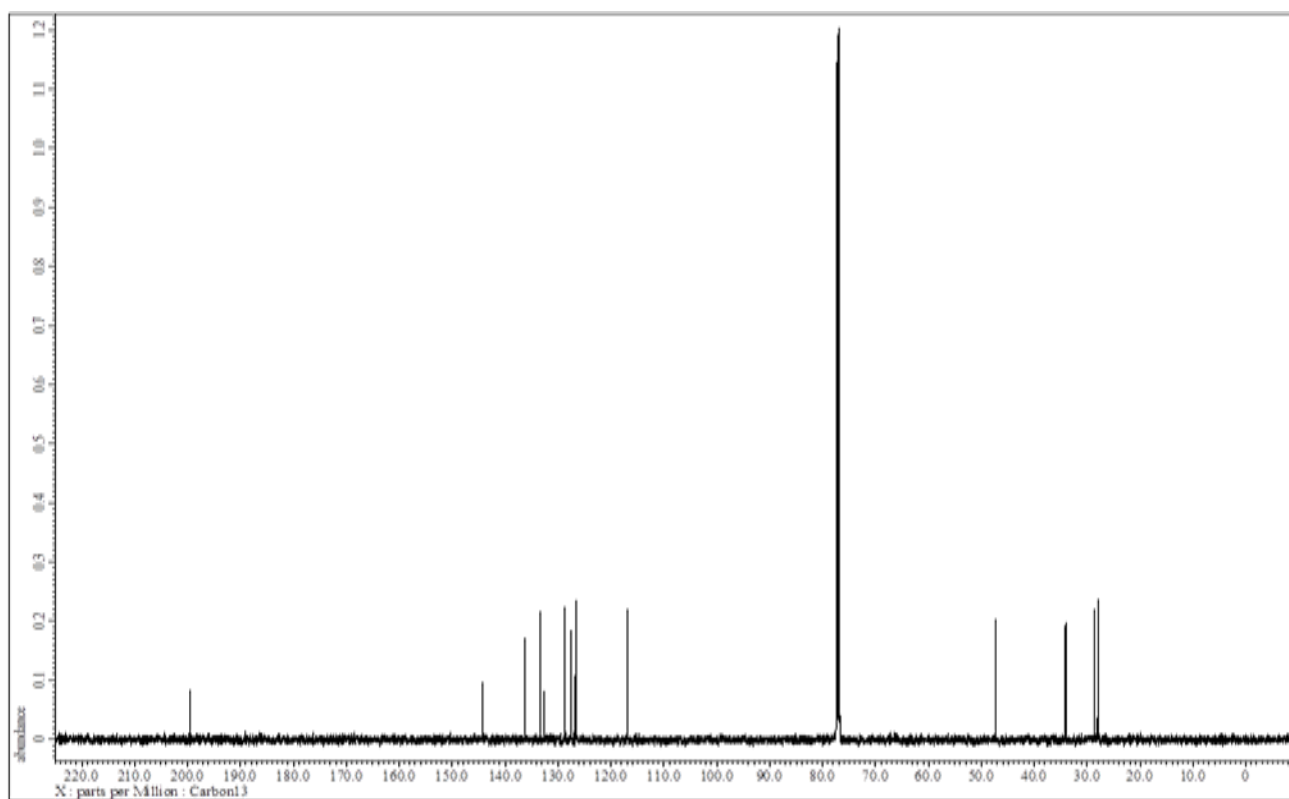

Supplementary figure 22.  $^{13}\text{C}$  NMR spectrum for **3c**



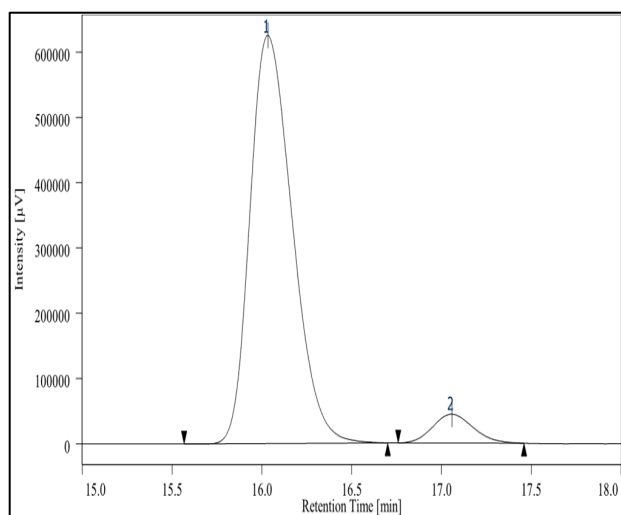

| Peak | Retention Time [min] | Area [%] |
|------|----------------------|----------|
| 1    | 16.233               | 49.594   |
| 2    | 17.008               | 50.406   |

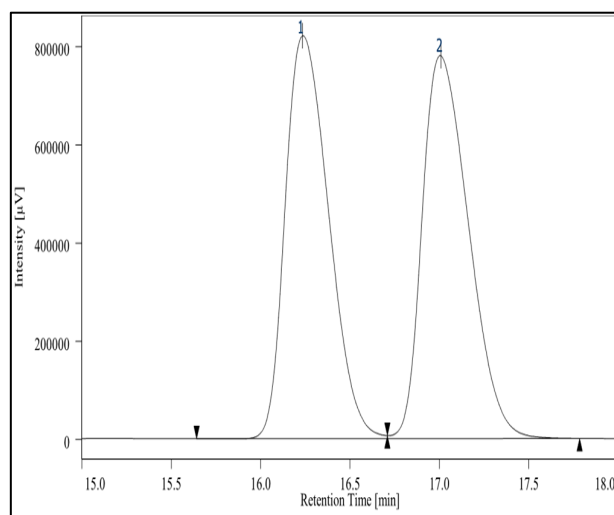

| Peak | Retention Time [min] | Area [%] |
|------|----------------------|----------|
| 1    | 16.033               | 93.674   |
| 2    | 17.058               | 6.326    |

Supplementary figure 23. HPLC spectra for 3c

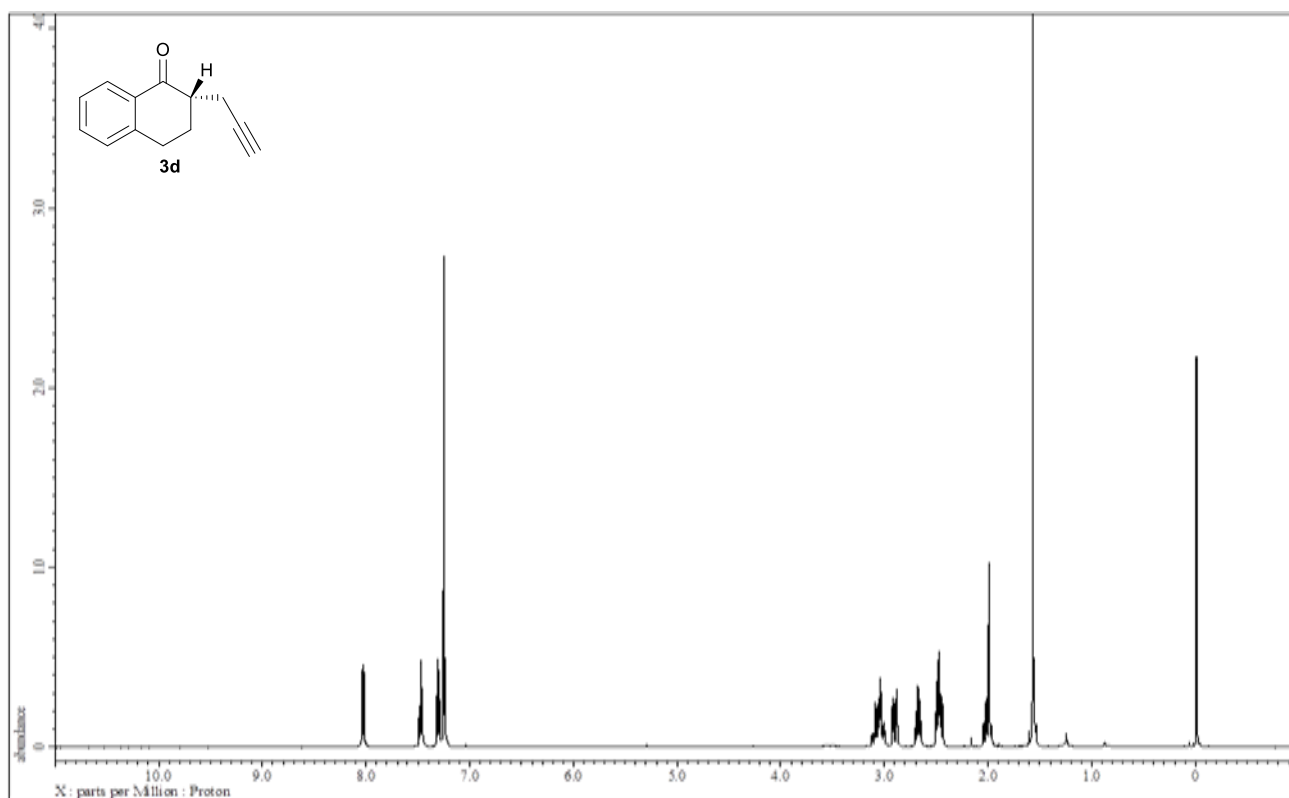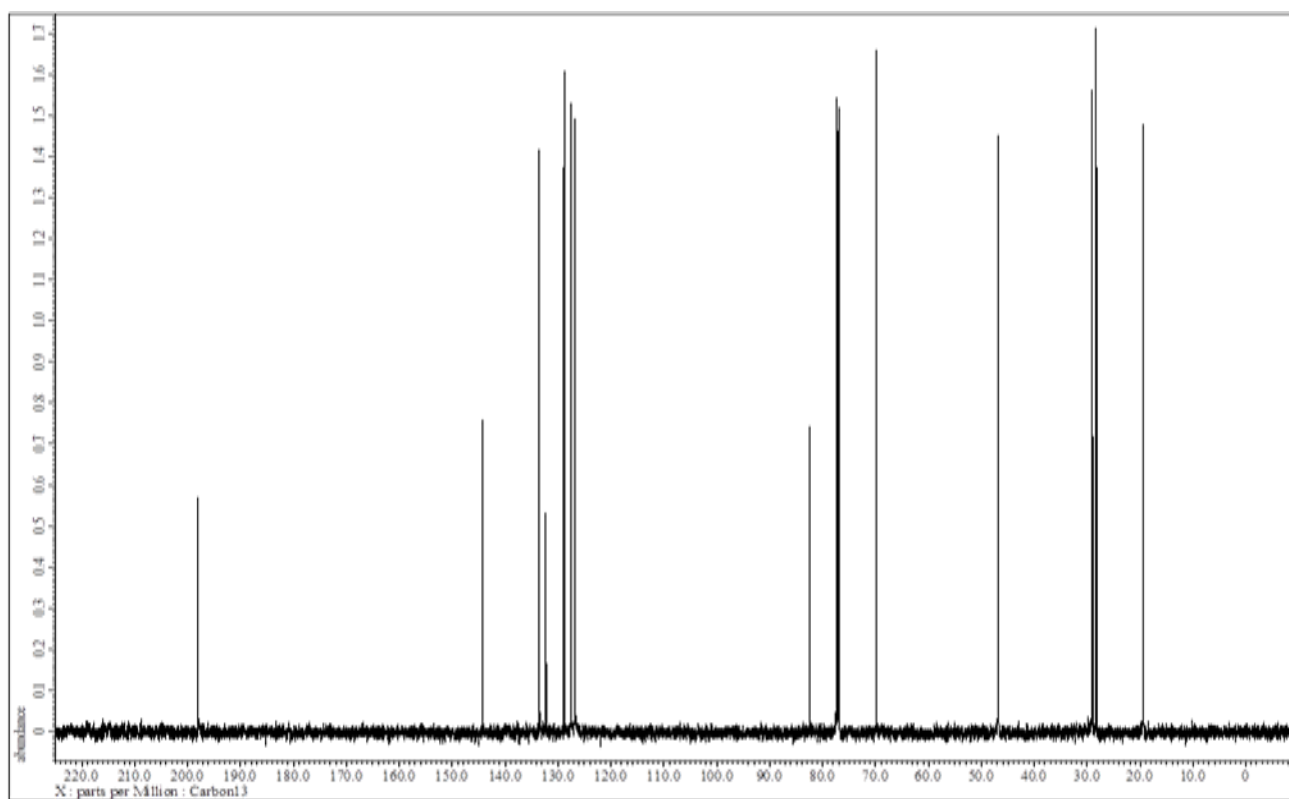

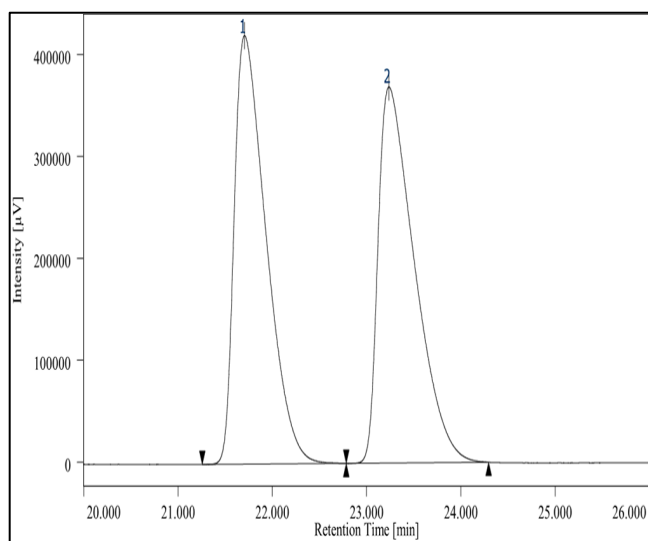

| Peak | Retention Time [min] | Area [%] |
|------|----------------------|----------|
| 1    | 21.705               | 49.952   |
| 2    | 23.235               | 50.048   |

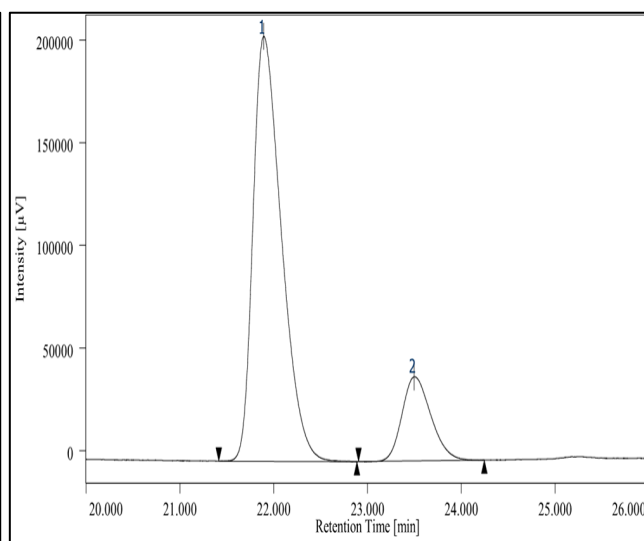

| Peak | Retention Time [min] | Area [%] |
|------|----------------------|----------|
| 1    | 21.893               | 83.332   |
| 2    | 23.495               | 16.668   |

Supplementary figure 26. HPLC spectra for 3d

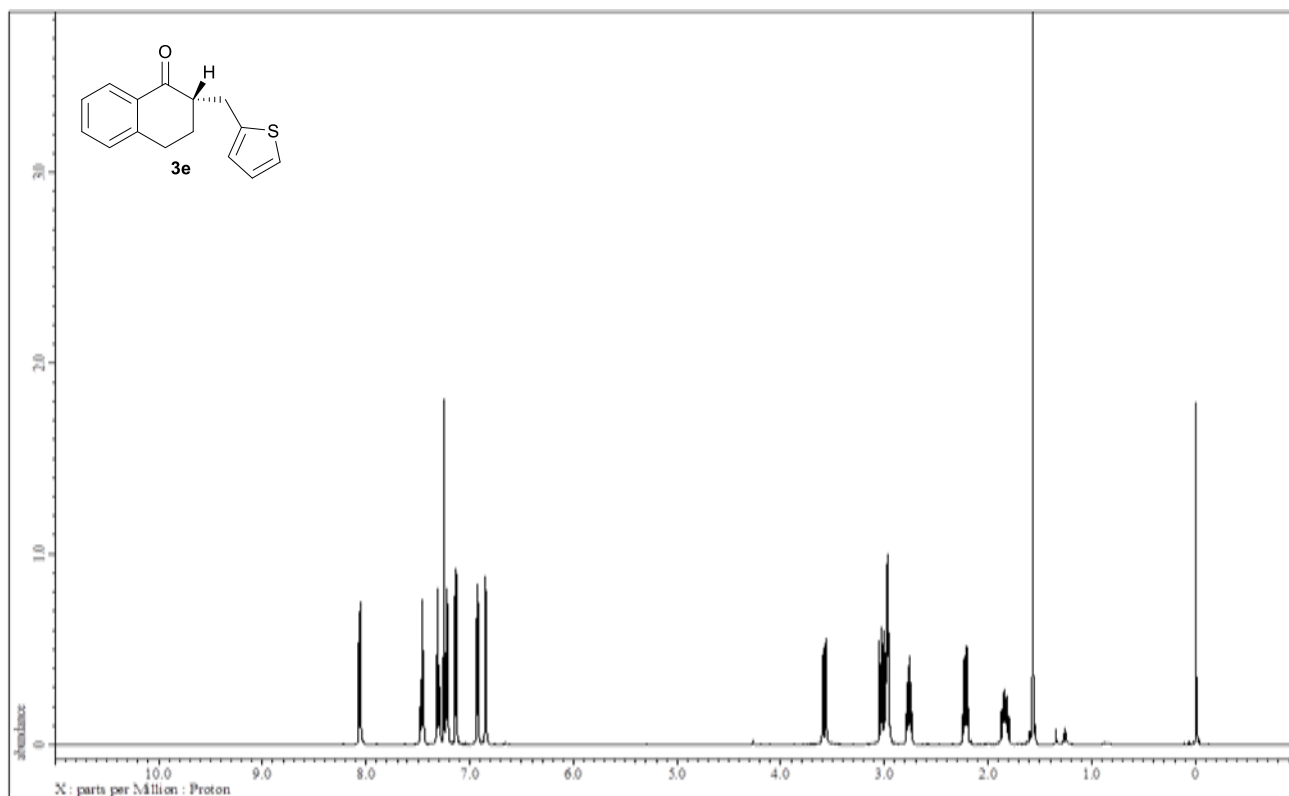

Supplementary figure 27. <sup>1</sup>H NMR spectrum for 3e

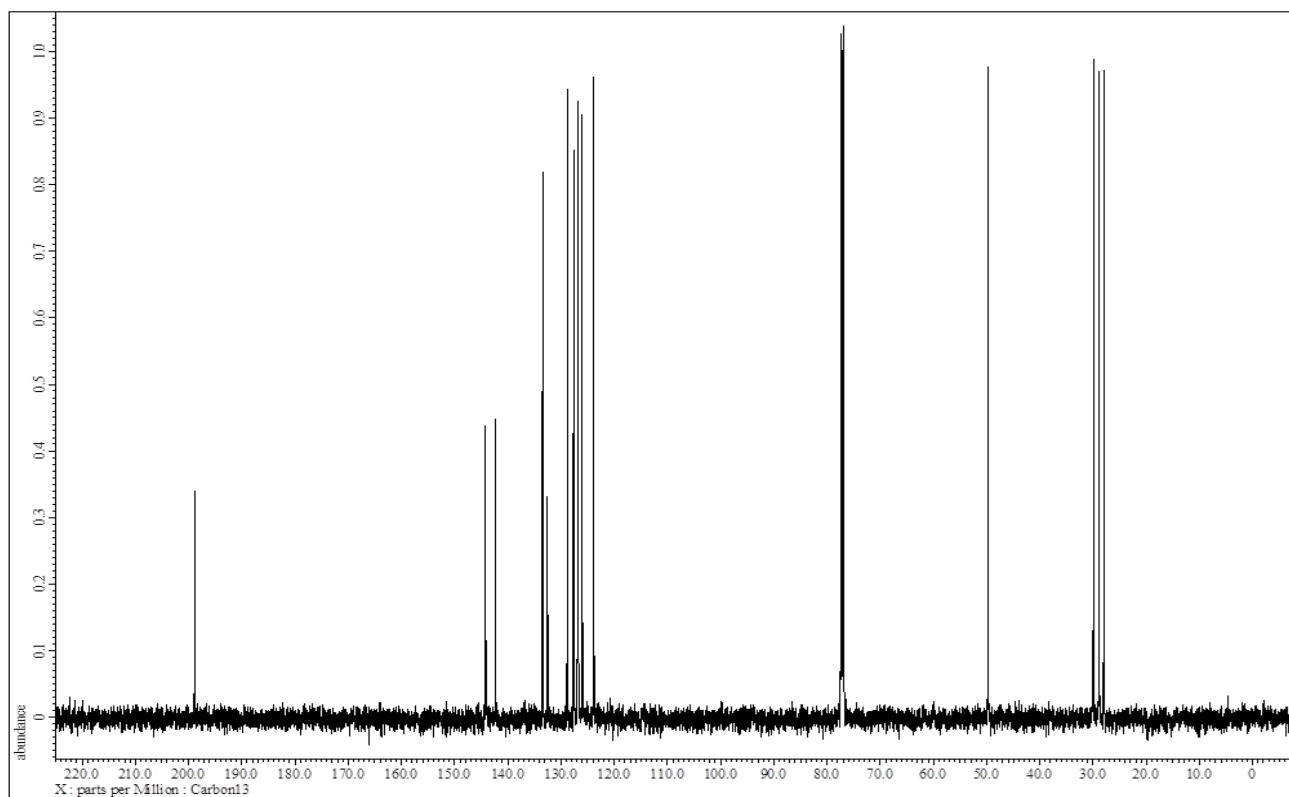

Supplementary figure 28. <sup>13</sup>C NMR spectrum for 3e

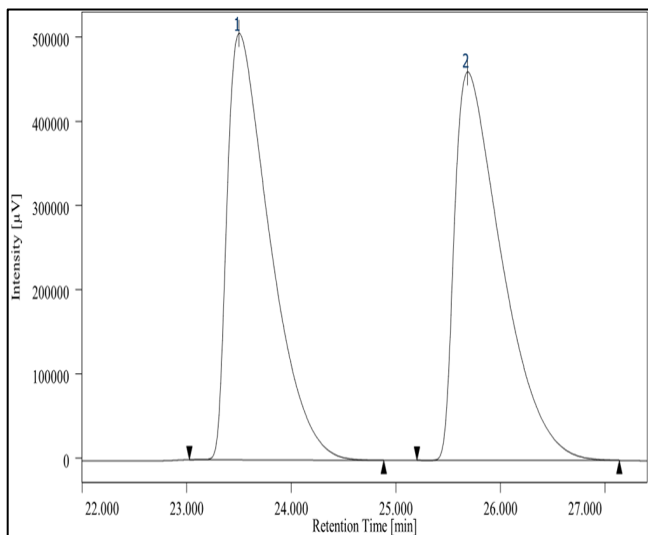

| Peak | Retention Time [min] | Area [%] |
|------|----------------------|----------|
| 1    | 23.500               | 49.801   |
| 2    | 25.683               | 50.199   |

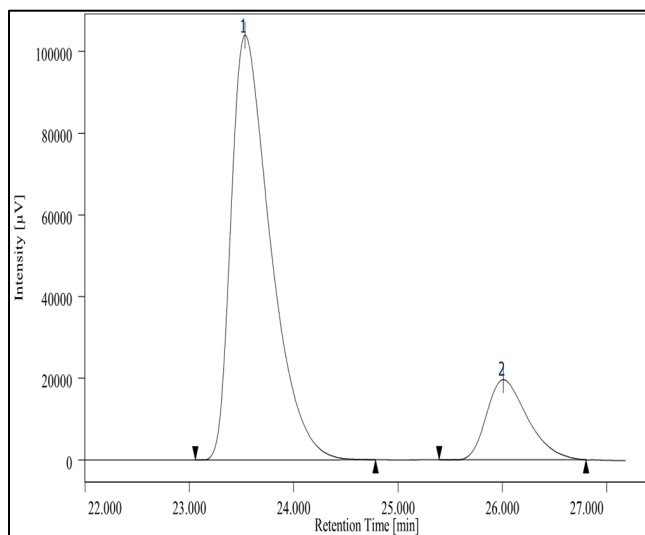

| Peak | Retention Time [min] | Area [%] |
|------|----------------------|----------|
| 1    | 23.533               | 83.609   |
| 2    | 26.008               | 16.391   |

Supplementary figure 29. HPLC spectra for 3e

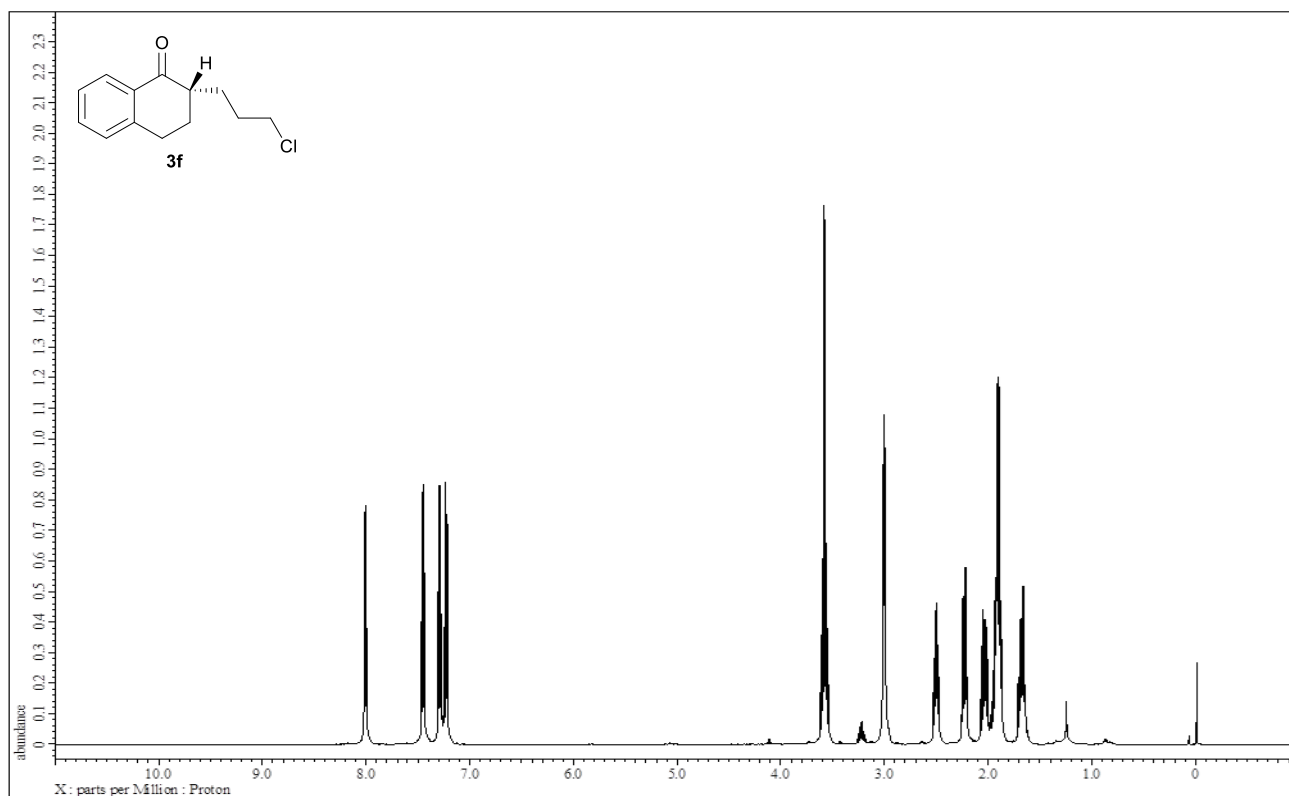

Supplementary figure 30.  $^1\text{H}$  NMR spectrum for **3f**

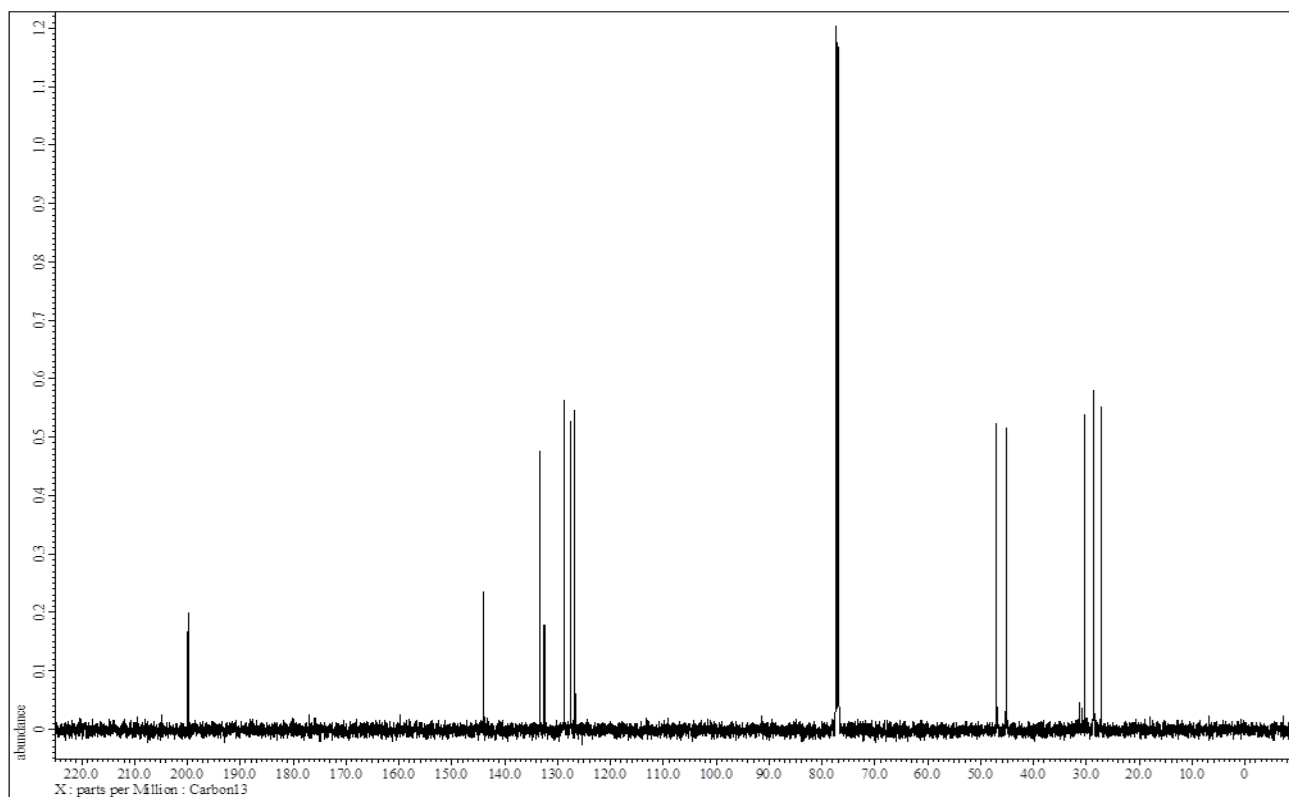

Supplementary figure 31.  $^{13}\text{C}$  NMR spectrum for **3f**

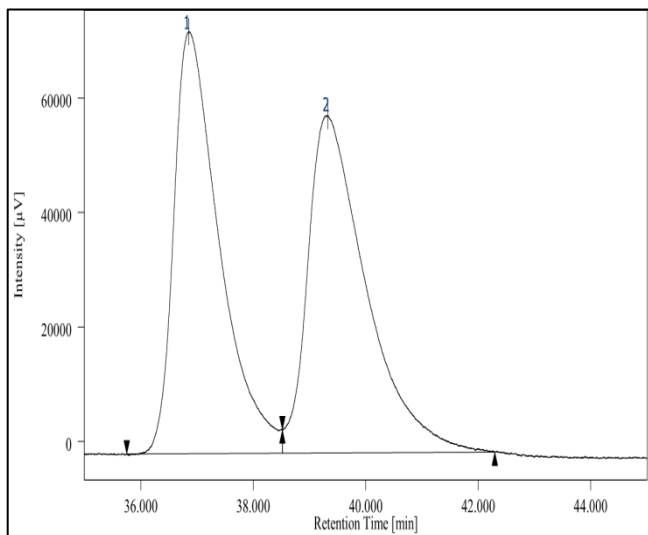

| Peak | Retention Time [min] | Area [%] |
|------|----------------------|----------|
| 1    | 36.852               | 49.485   |
| 2    | 39.325               | 50.515   |

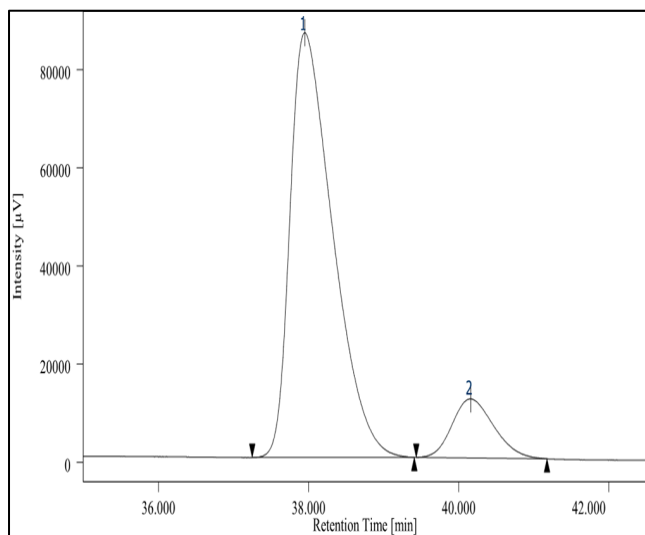

| Peak | Retention Time [min] | Area [%] |
|------|----------------------|----------|
| 1    | 37.950               | 88.077   |
| 2    | 40.158               | 11.923   |

Supplementary figure 32. HPLC spectra for 3f

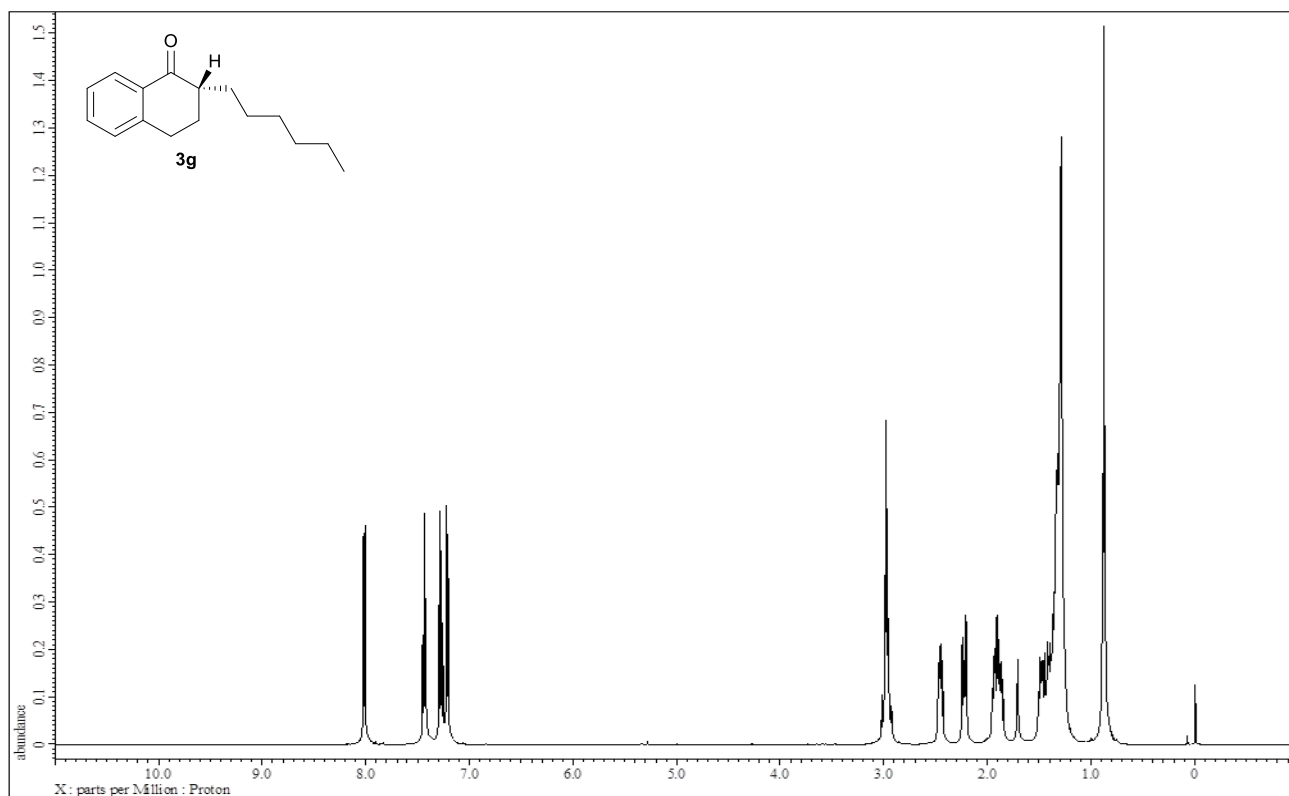

Supplementary figure 33.  $^1\text{H}$  NMR spectrum for **3g**

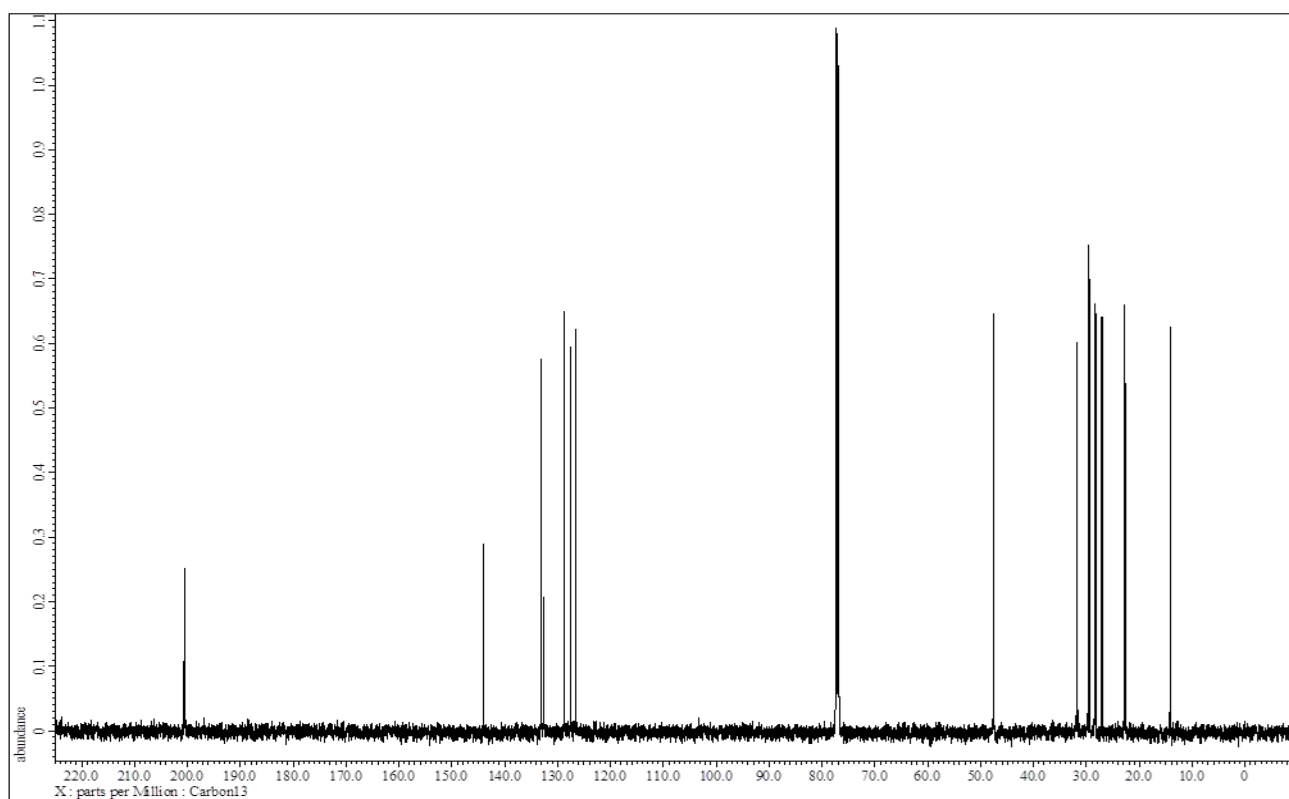

Supplementary figure 34.  $^{13}\text{C}$  NMR spectrum for **3g**



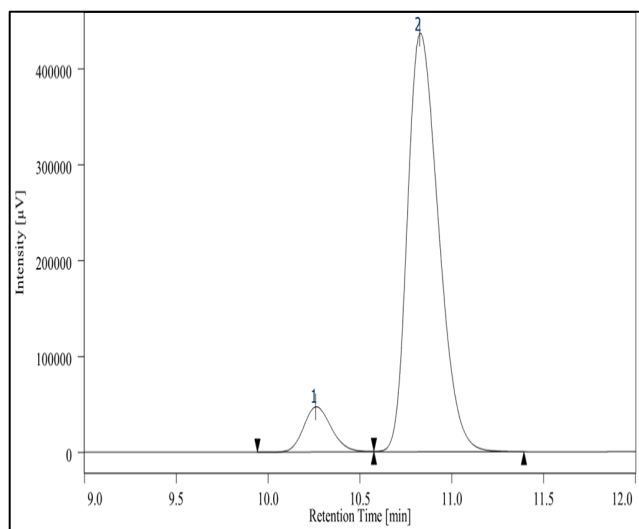

| Peak | Retention Time [min] | Area [%] |
|------|----------------------|----------|
| 1    | 10.275               | 49.866   |
| 2    | 10.892               | 50.134   |

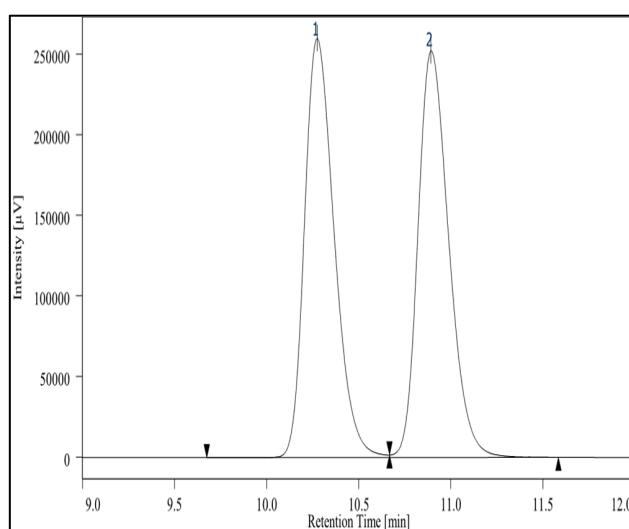

| Peak | Retention Time [min] | Area [%] |
|------|----------------------|----------|
| 1    | 10.258               | 8.850    |
| 2    | 10.825               | 91.150   |

Supplementary figure 35. HPLC spectra for 3g

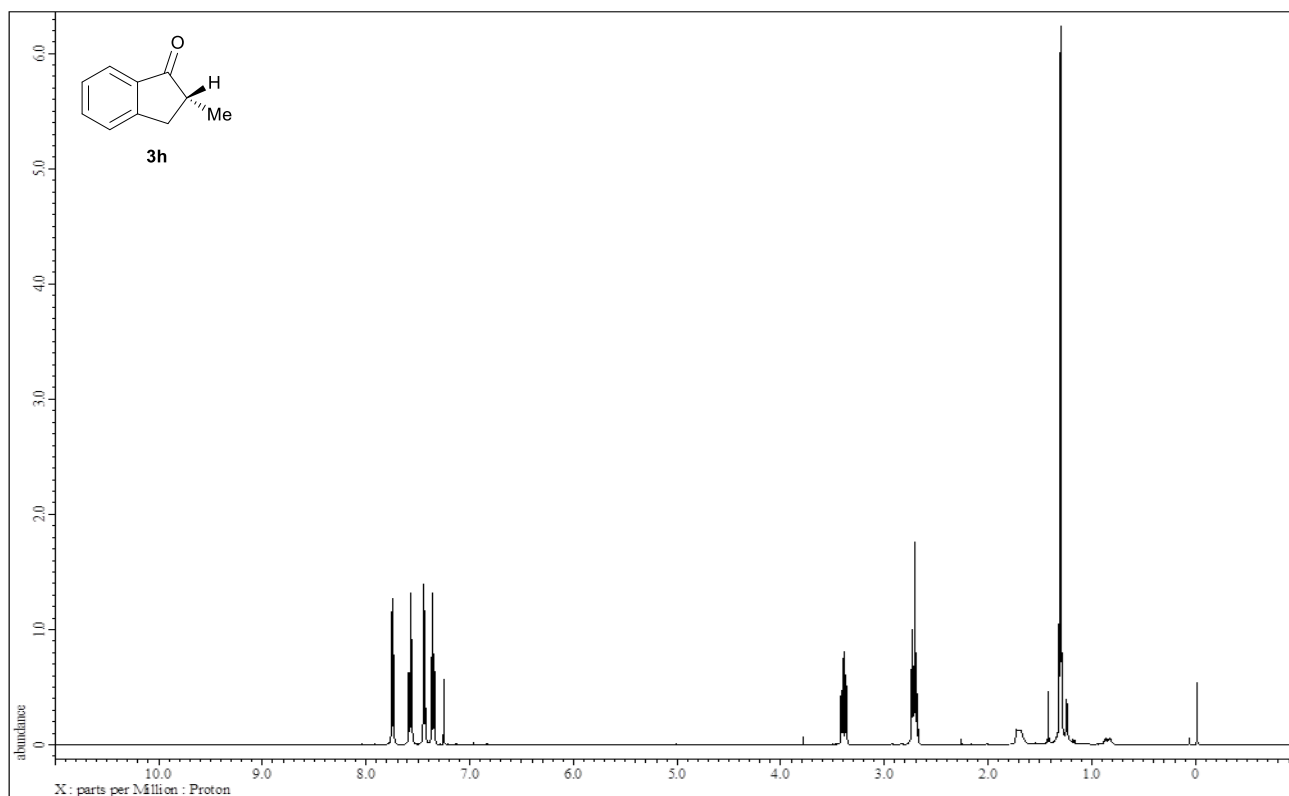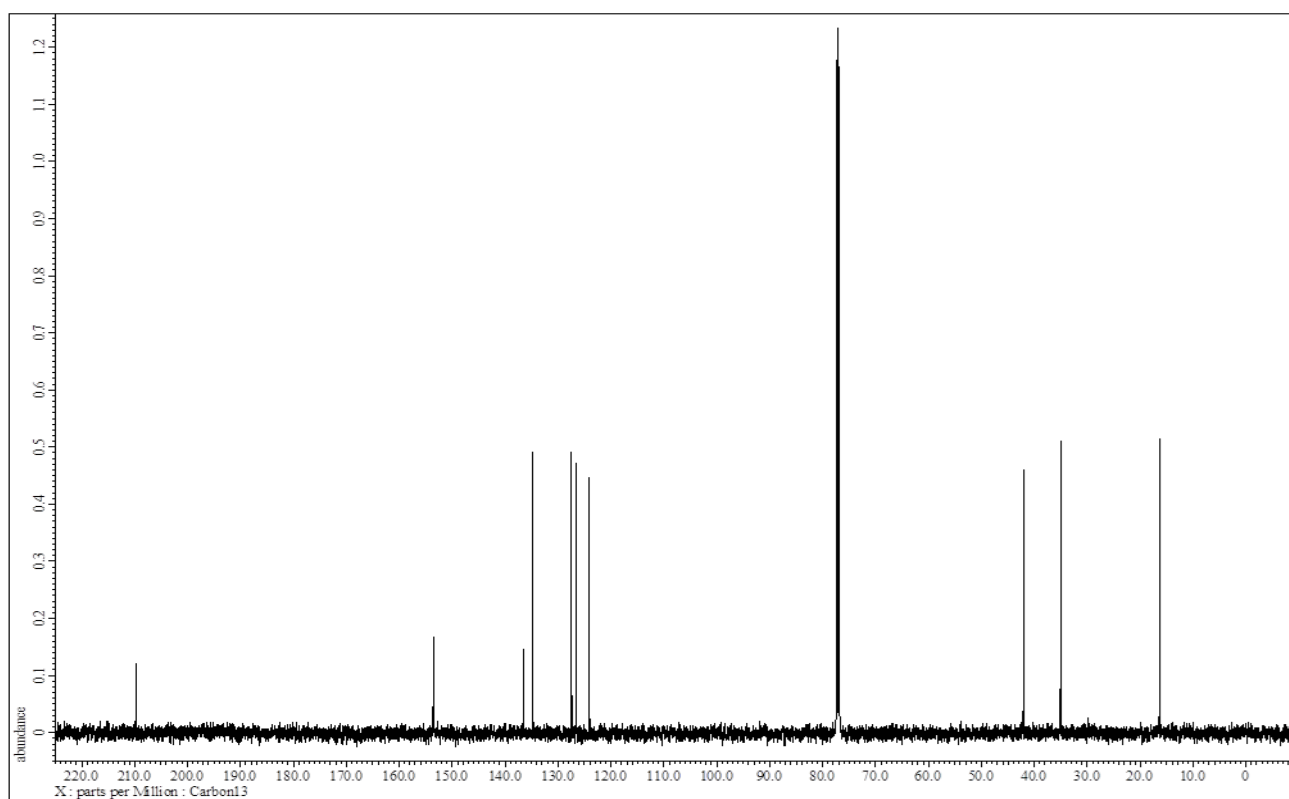

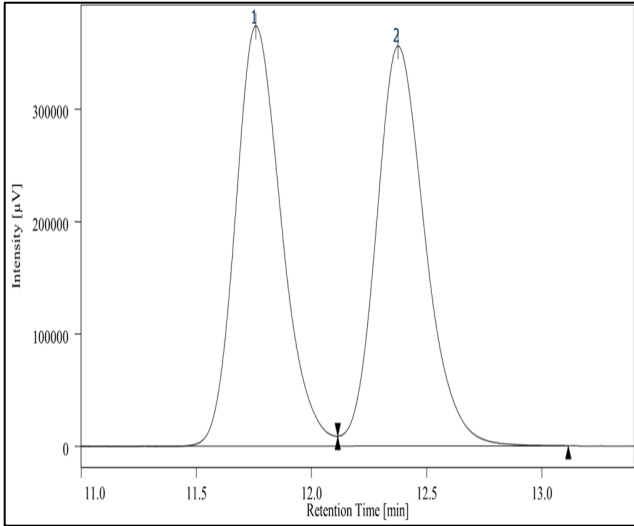

| Peak | Retention Time [min] | Area [%] |
|------|----------------------|----------|
| 1    | 11.758               | 49.794   |
| 2    | 12.375               | 50.206   |

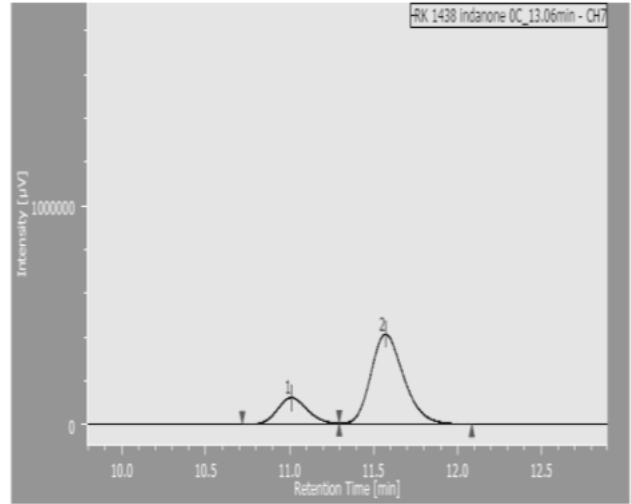

| # | ピーク名    | CH | tR [min] | 面積 [μV·sec] | 高さ [μV] | 面積%    | 高さ%    |
|---|---------|----|----------|-------------|---------|--------|--------|
| 1 | Unknown | 7  | 11.010   | 1528590     | 121592  | 21.426 | 22.897 |
| 2 | Unknown | 7  | 11.572   | 5605644     | 409443  | 78.574 | 77.103 |

Supplementary figure 38. HPLC spectra for 3h

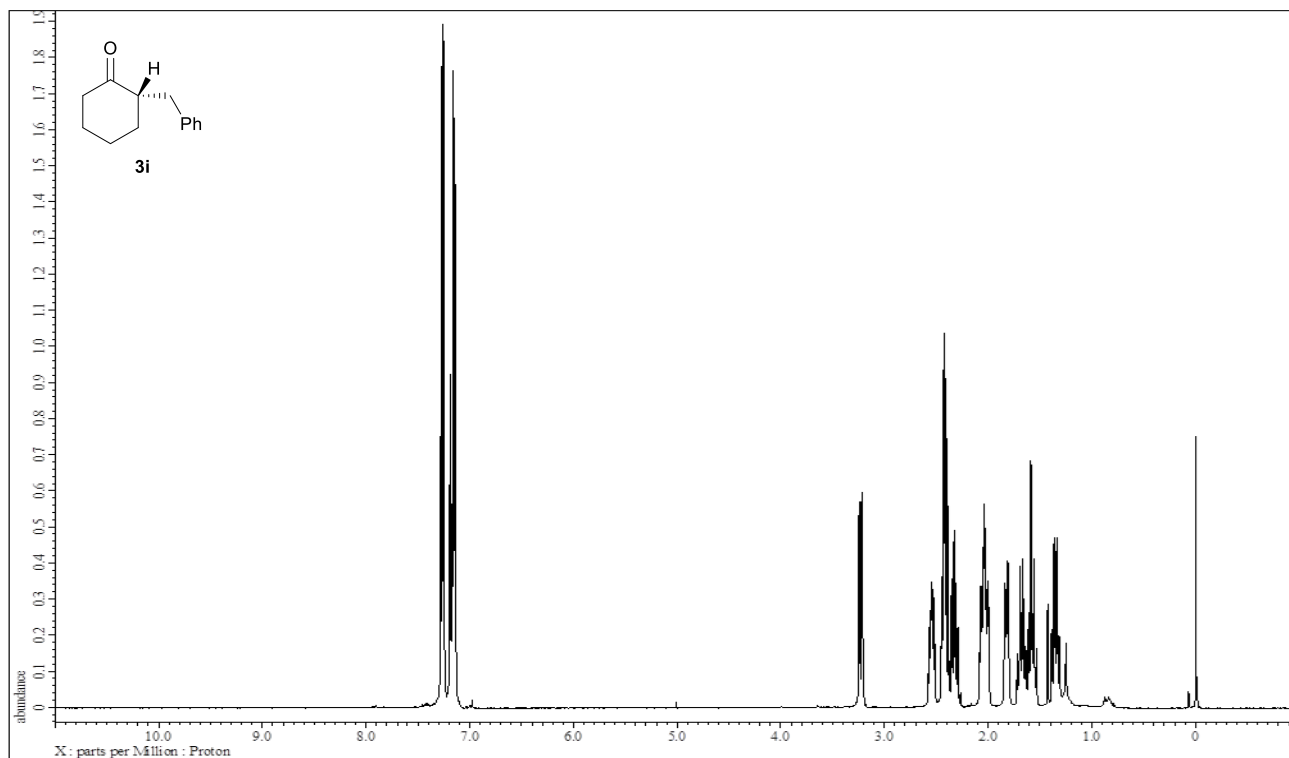

Supplementary figure 39. <sup>1</sup>H NMR spectrum for **3i**

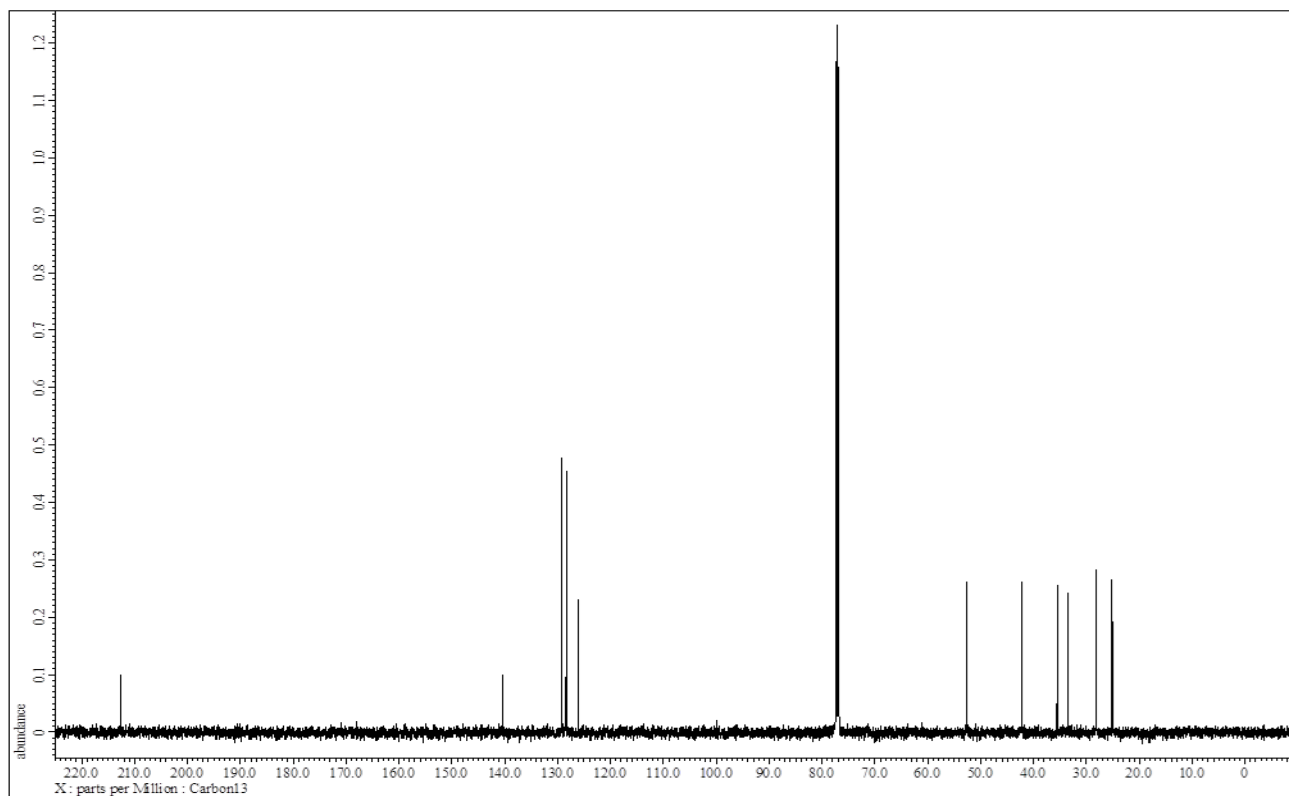

Supplementary figure 40. <sup>13</sup>C NMR spectrum for **3i**

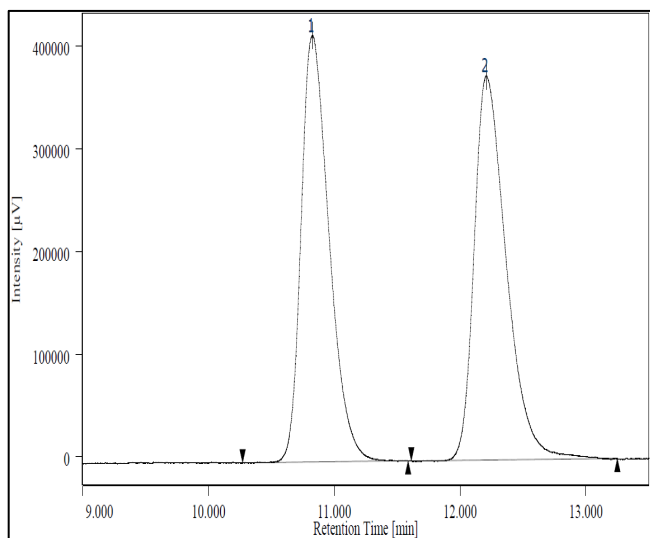

| Peak | Retention Time [min] | Area [%] |
|------|----------------------|----------|
| 1    | 10.828               | 49.130   |
| 2    | 12.210               | 50.870   |

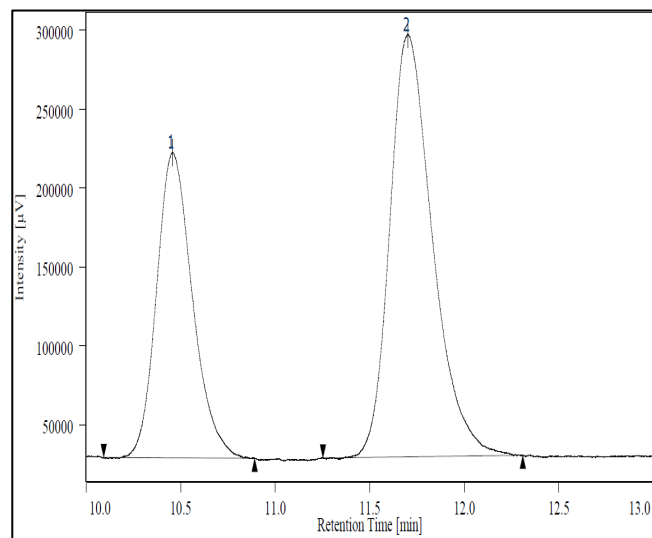

| Peak | Retention Time [min] | Area [%] |
|------|----------------------|----------|
| 1    | 10.458               | 37.789   |
| 2    | 11.702               | 62.211   |

Supplementary figure 41. HPLC spectra for **3i**

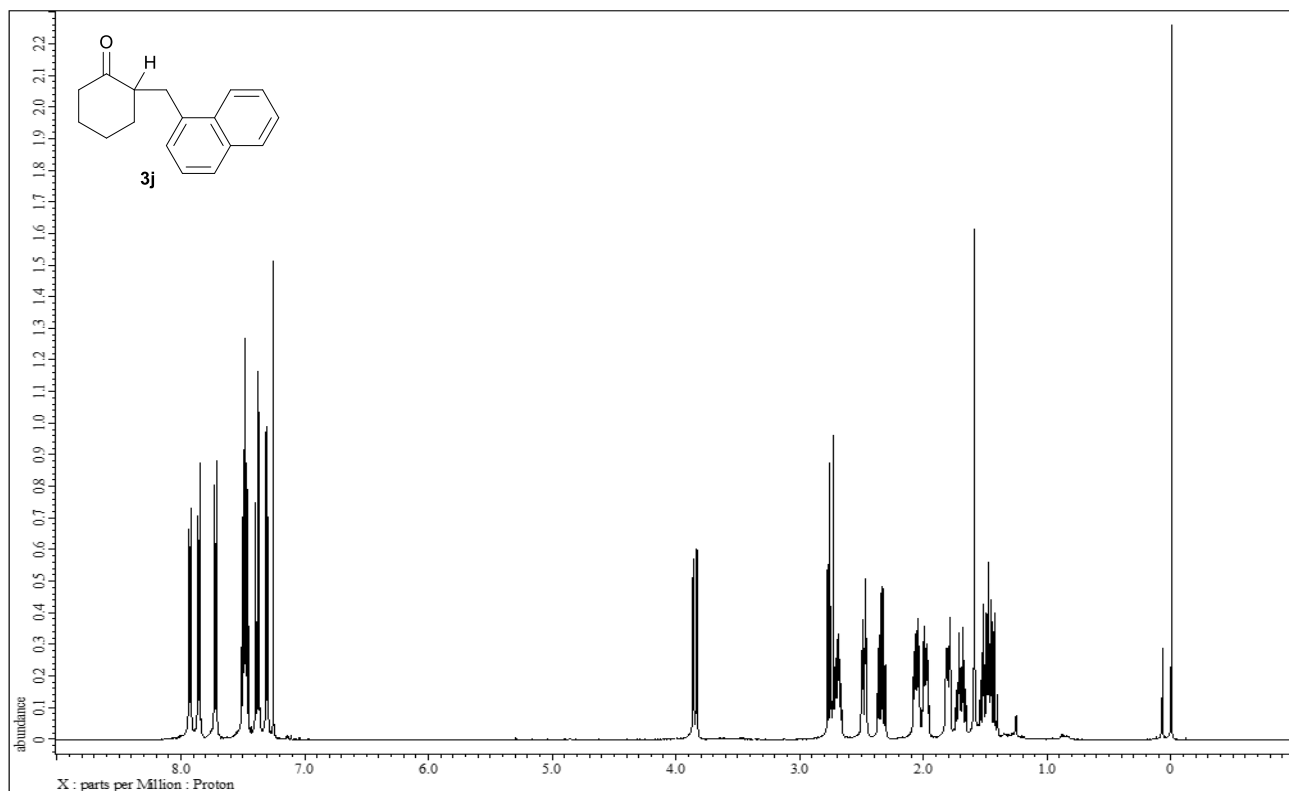

Supplementary figure 42.  $^1\text{H}$  NMR spectrum for **3j**

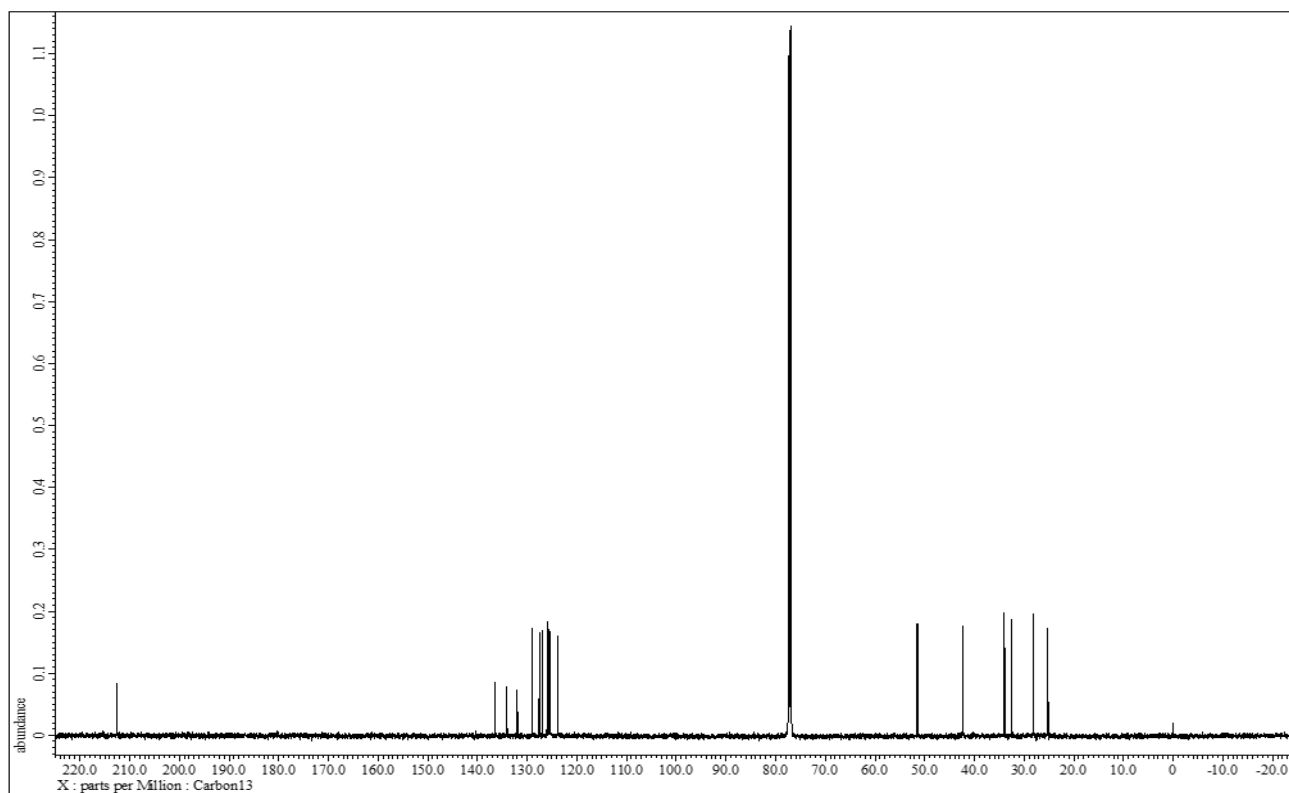

Supplementary figure 43.  $^{13}\text{C}$  NMR spectrum for **3j**

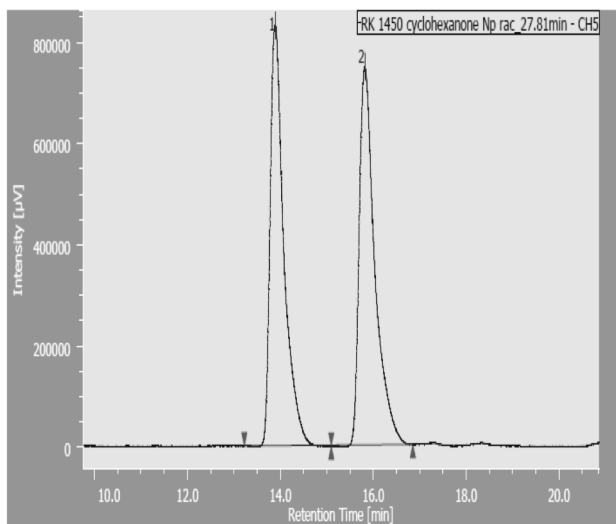

| # | ピーク名    | CH | tR [min] | 面積 [μV·sec] | 高さ [μV] | 面積%    | 高さ%    |
|---|---------|----|----------|-------------|---------|--------|--------|
| 1 | Unknown | 5  | 13.892   | 17046334    | 831144  | 49.437 | 52.666 |
| 2 | Unknown | 5  | 15.813   | 17434301    | 747008  | 50.563 | 47.334 |

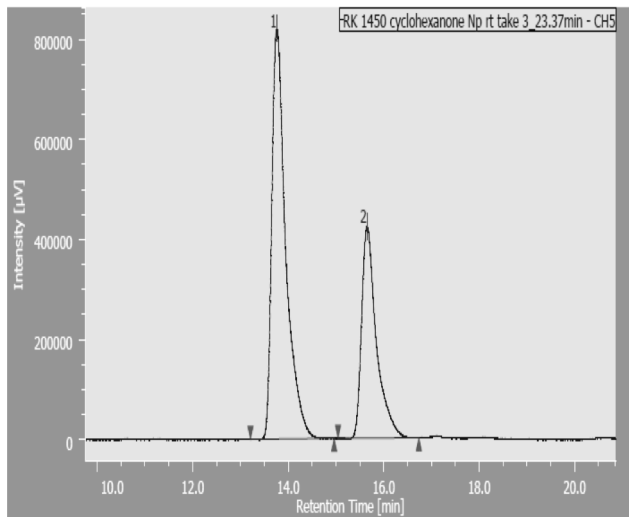

| # | ピーク名    | CH | tR [min] | 面積 [μV·sec] | 高さ [μV] | 面積%    | 高さ%    |
|---|---------|----|----------|-------------|---------|--------|--------|
| 1 | Unknown | 5  | 13.758   | 16652638    | 819693  | 64.777 | 65.968 |
| 2 | Unknown | 5  | 15.650   | 9054939     | 422871  | 35.223 | 34.032 |

Supplementary figure 44. HPLC spectra for 3j

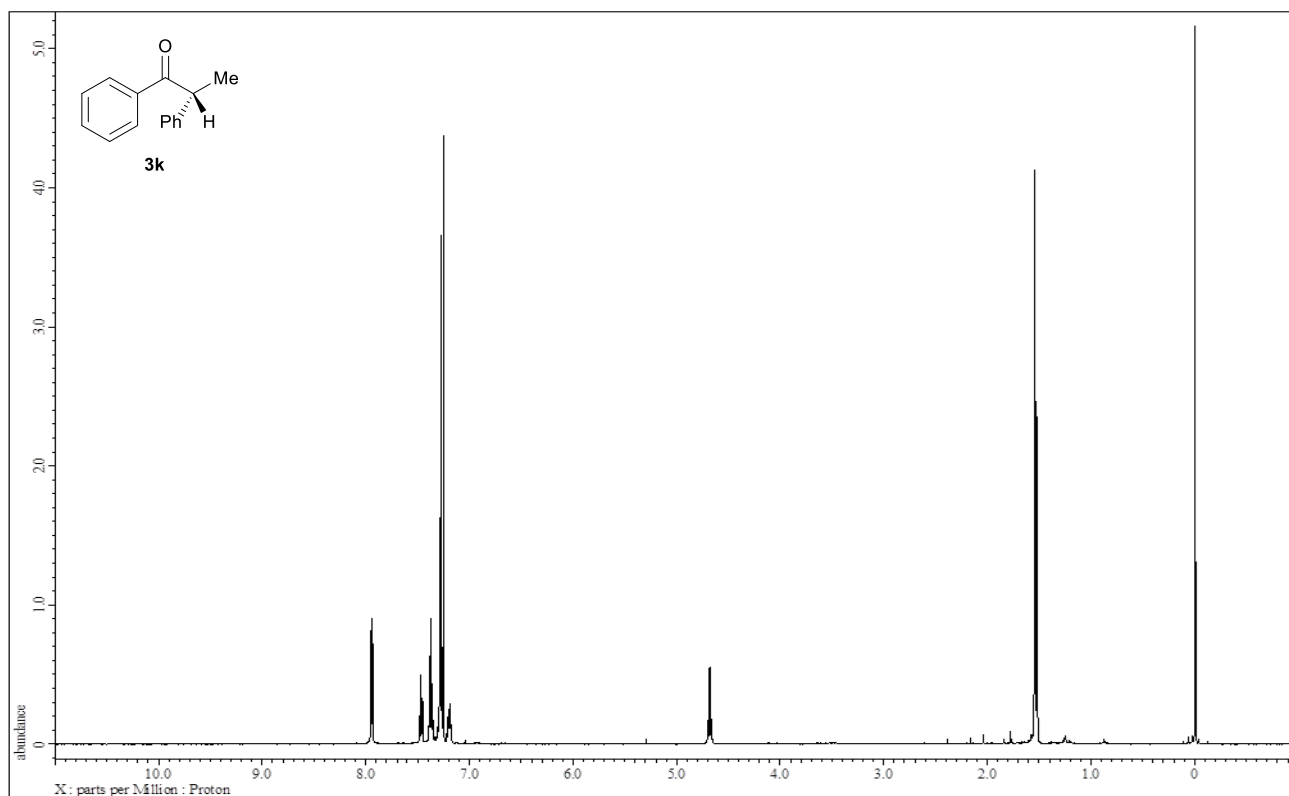

Supplementary figure 45. <sup>1</sup>H NMR spectrum for 3k

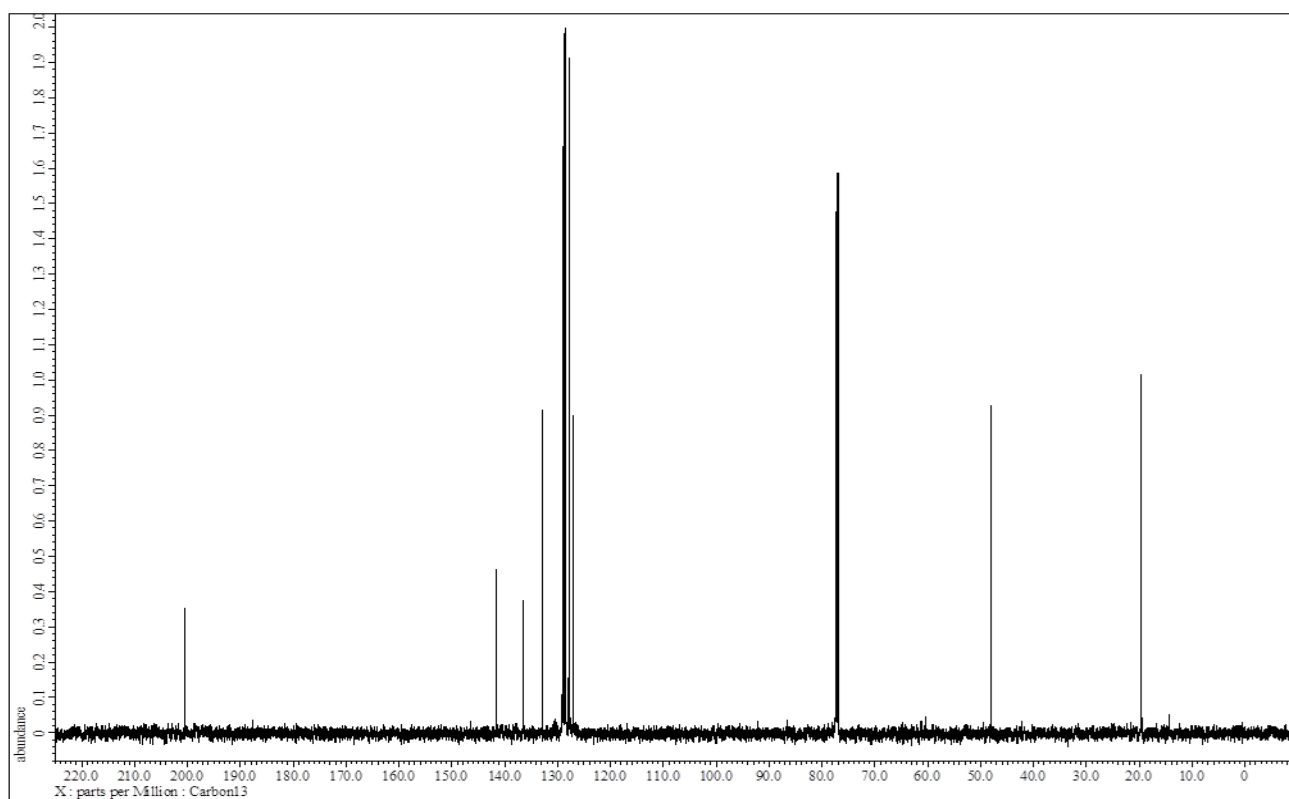

Supplementary figure 46. <sup>13</sup>C NMR spectrum for 3k



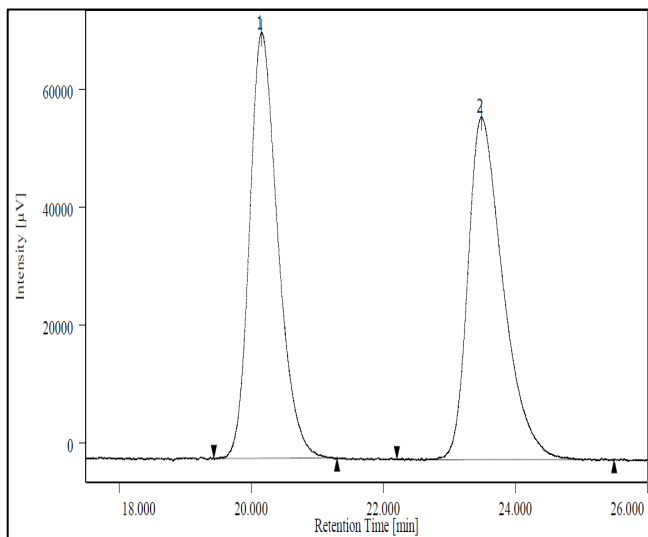

| Peak | Retention Time [min] | Area [%] |
|------|----------------------|----------|
| 1    | 20.162               | 49.945   |
| 2    | 23.490               | 50.055   |

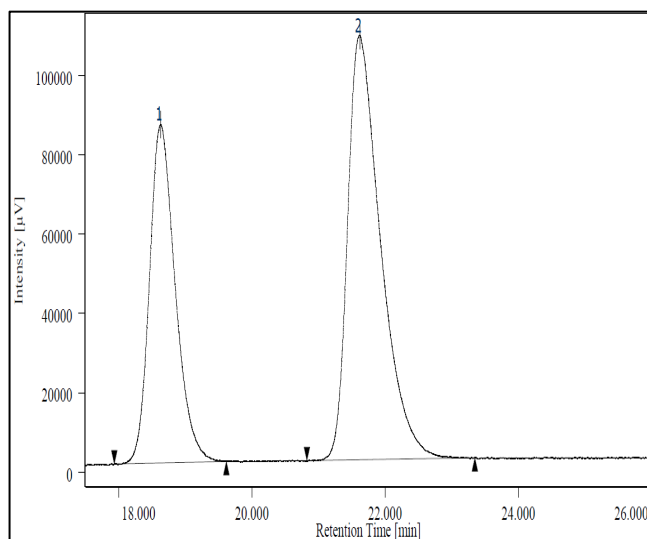

| Peak | Retention Time [min] | Area [%] |
|------|----------------------|----------|
| 1    | 18.633               | 38.429   |
| 2    | 21.625               | 61.571   |

Supplementary figure 47. HPLC spectra for 3k

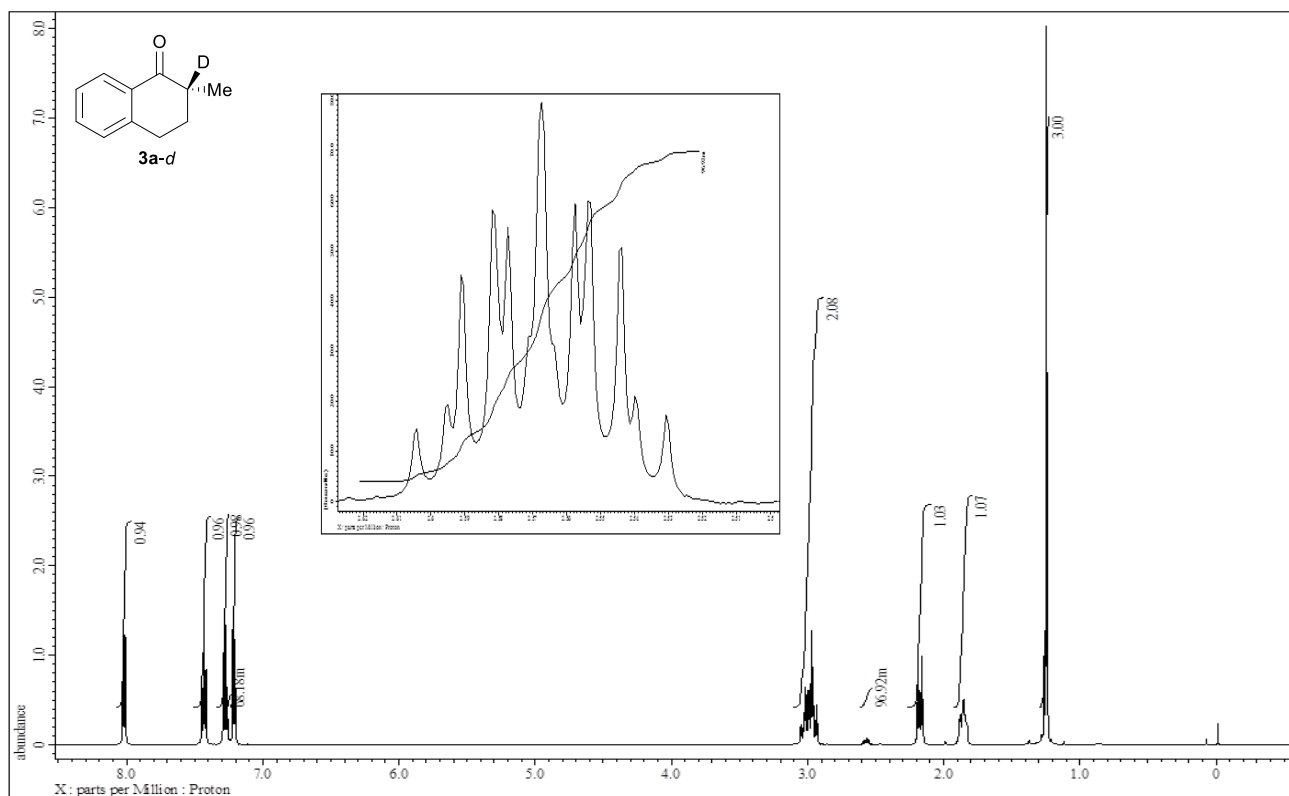

Supplementary figure 48.  $^1\text{H}$  NMR spectrum for **3a-d**

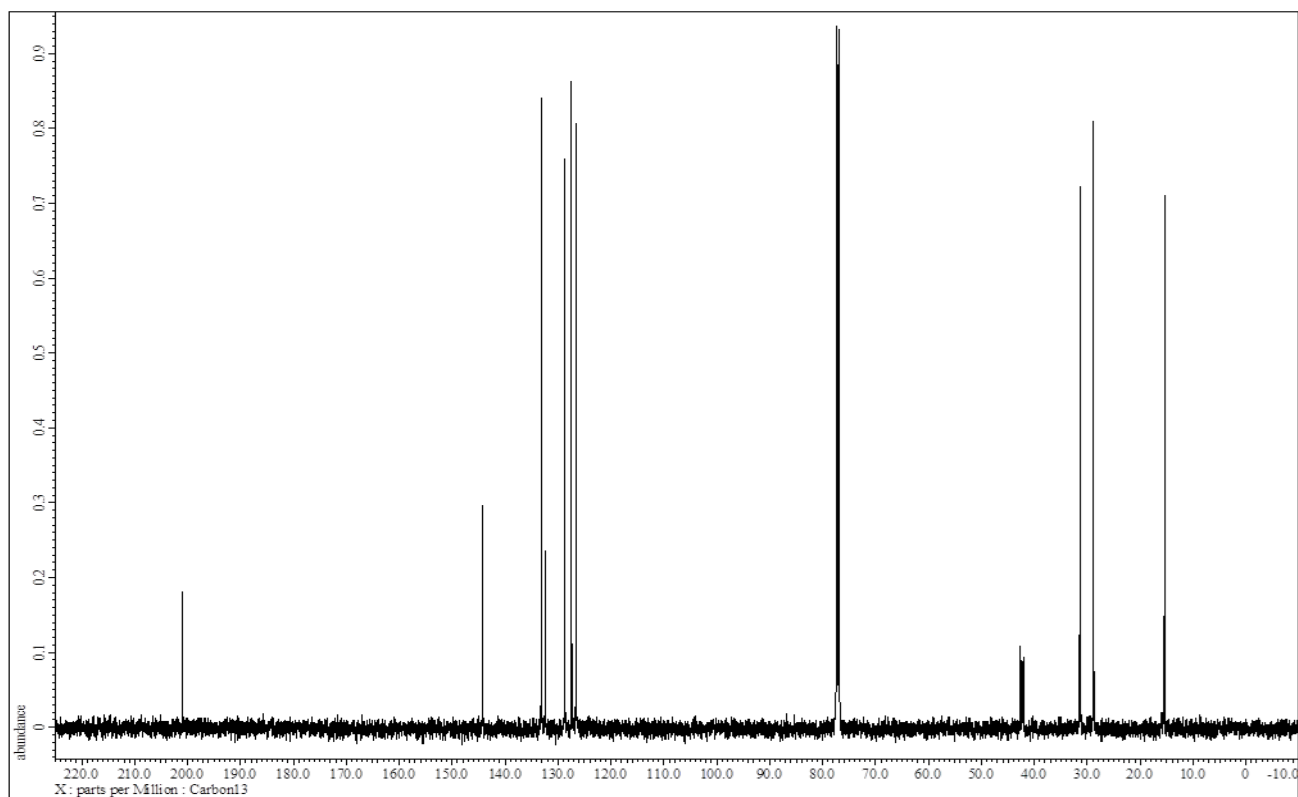

Supplementary figure 49.  $^{13}\text{C}$  NMR spectrum for **3a-d**

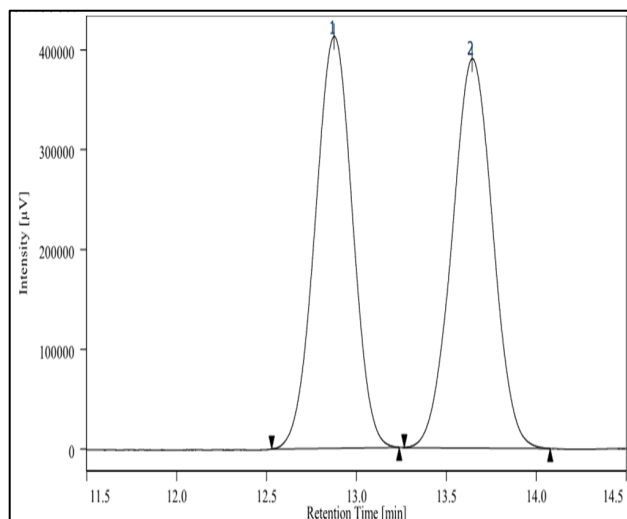

| Peak | Retention Time [min] | Area [%] |
|------|----------------------|----------|
| 1    | 12.875               | 49.168   |
| 2    | 13.642               | 50.832   |

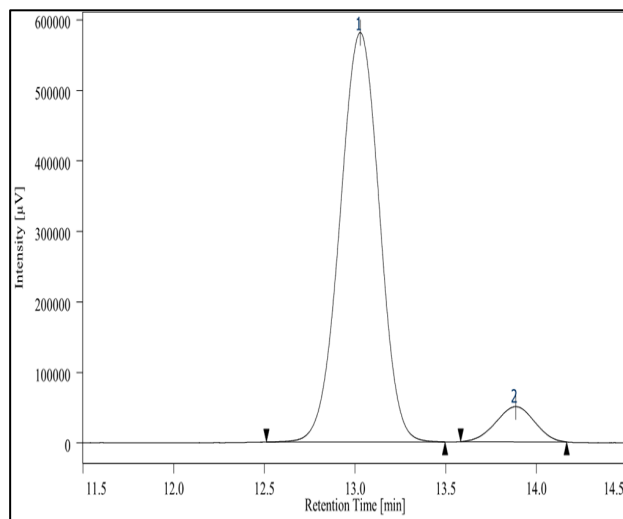

| Peak | Retention Time [min] | Area [%] |
|------|----------------------|----------|
| 1    | 13.028               | 92.221   |
| 2    | 13.885               | 7.779    |

Supplementary figure 50. HPLC spectra for 3a-d

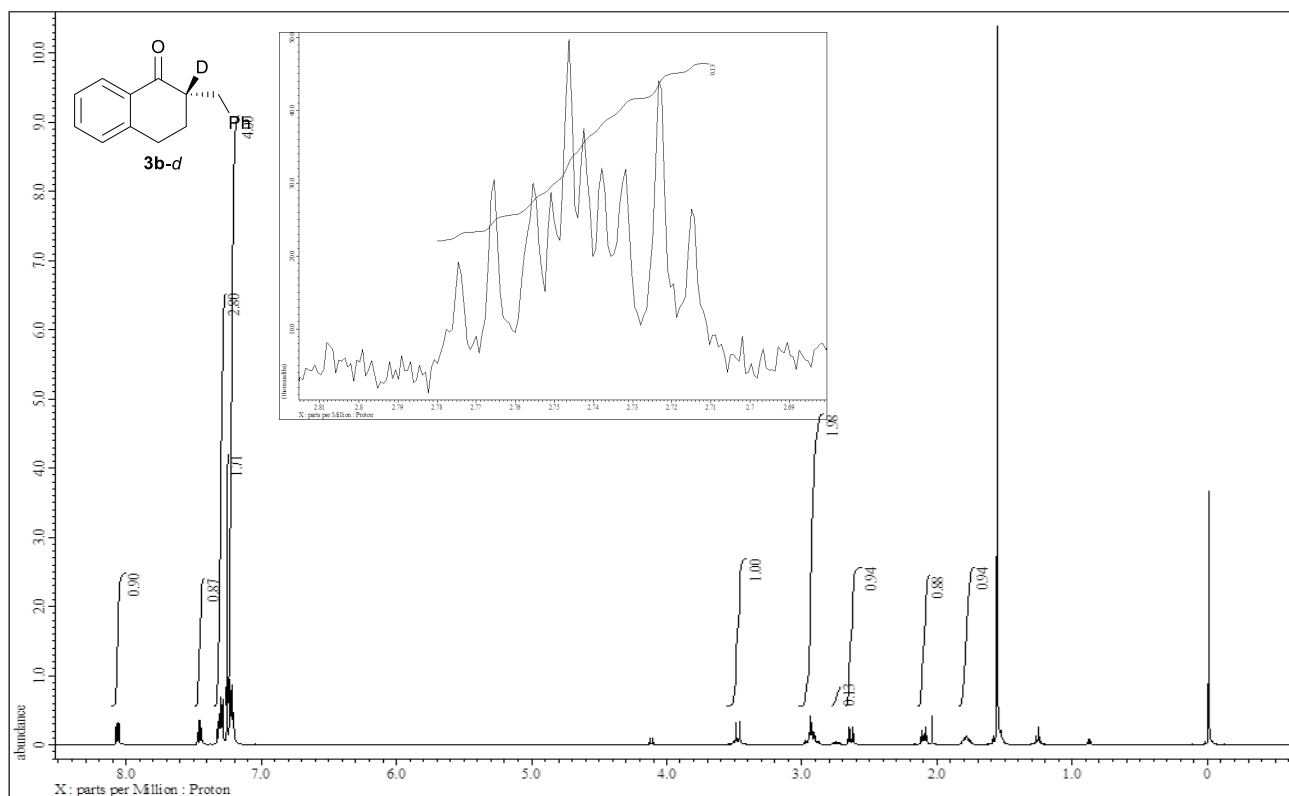

Supplementary figure 51.  $^1\text{H}$  NMR spectrum for **3b-d**

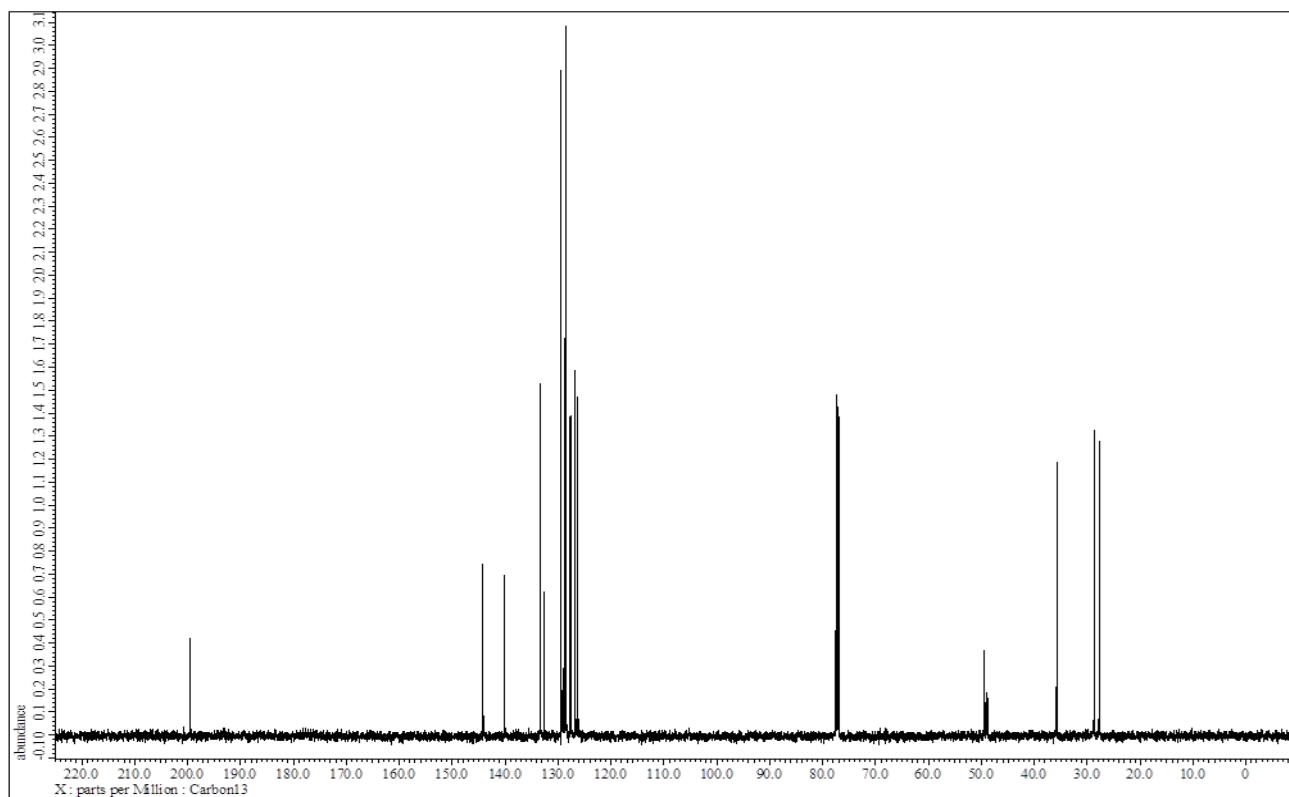

Supplementary figure 52.  $^{13}\text{C}$  NMR spectrum for **3b-d**

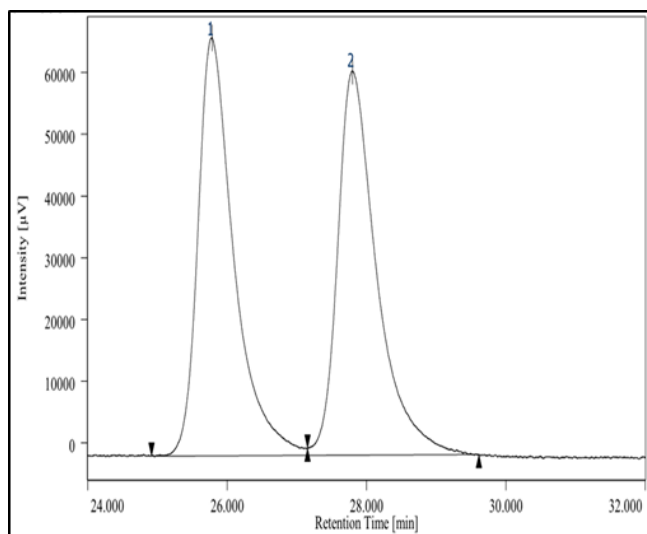

| Peak | Retention Time [min] | Area [%] |
|------|----------------------|----------|
| 1    | 21.902               | 49.880   |
| 2    | 23.807               | 50.120   |

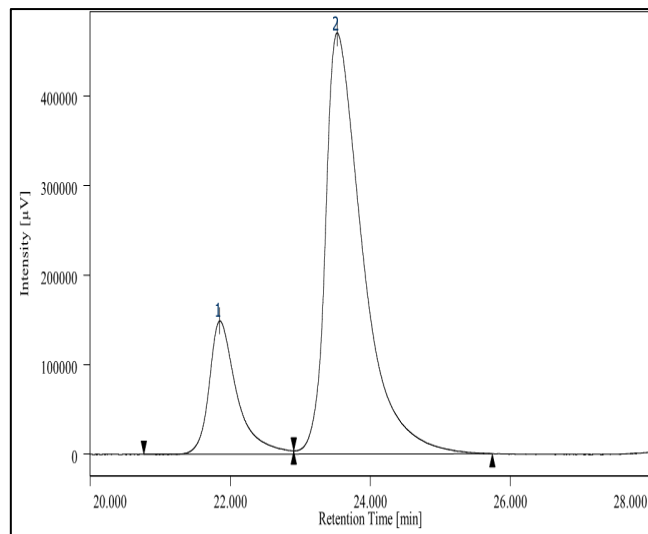

| Peak | Retention Time [min] | Area [%] |
|------|----------------------|----------|
| 1    | 21.850               | 19.140   |
| 2    | 23.528               | 80.860   |

Supplementary figure 53. HPLC spectra for **3b-d**

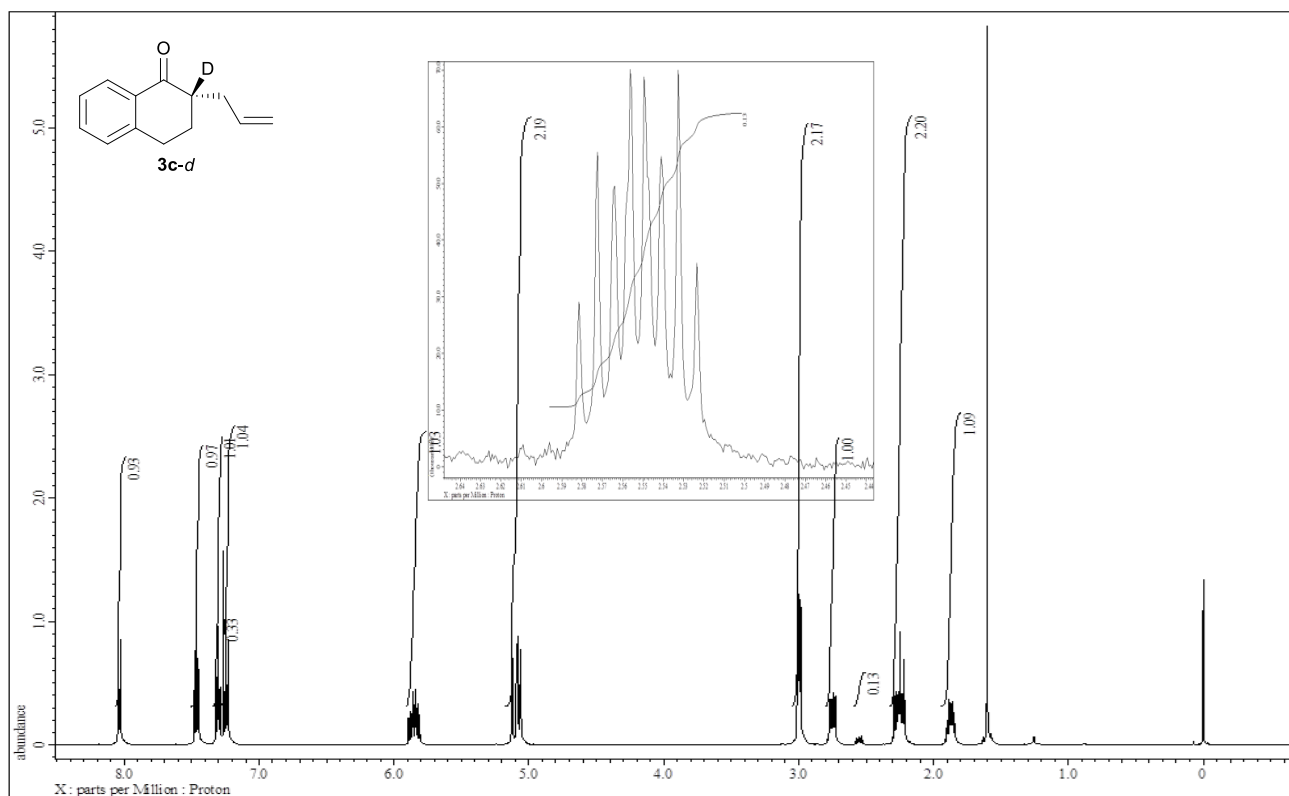

Supplementary figure 54.  $^1\text{H}$  NMR spectrum for **3c-d**

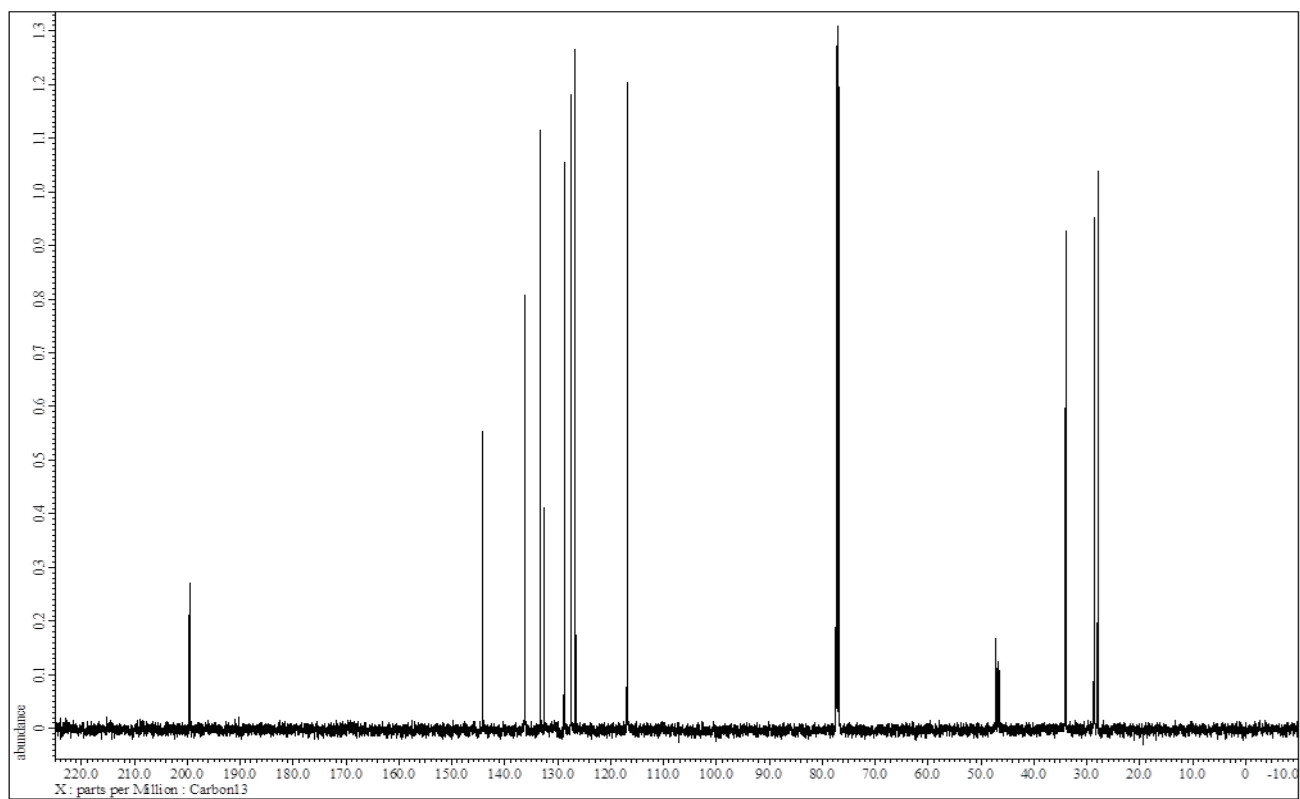

Supplementary figure 55.  $^{13}\text{C}$  NMR spectrum for **3c-d**

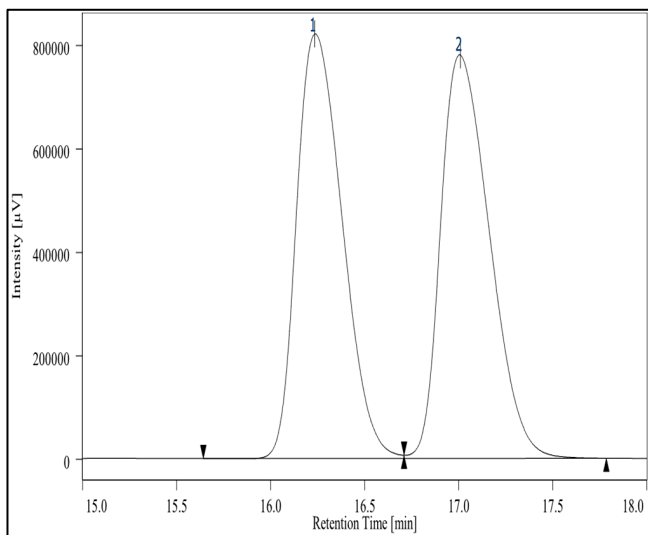

| Peak | Retention Time [min] | Area [%] |
|------|----------------------|----------|
| 1    | 16.233               | 49.594   |
| 2    | 17.008               | 50.406   |

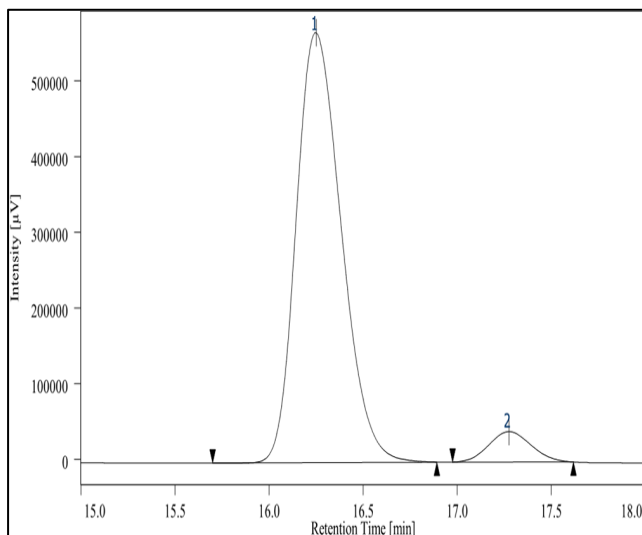

| Peak | Retention Time [min] | Area [%] |
|------|----------------------|----------|
| 1    | 16.250               | 93.751   |
| 2    | 17.275               | 6.249    |

Supplementary figure 56. HPLC spectra for 3c-d

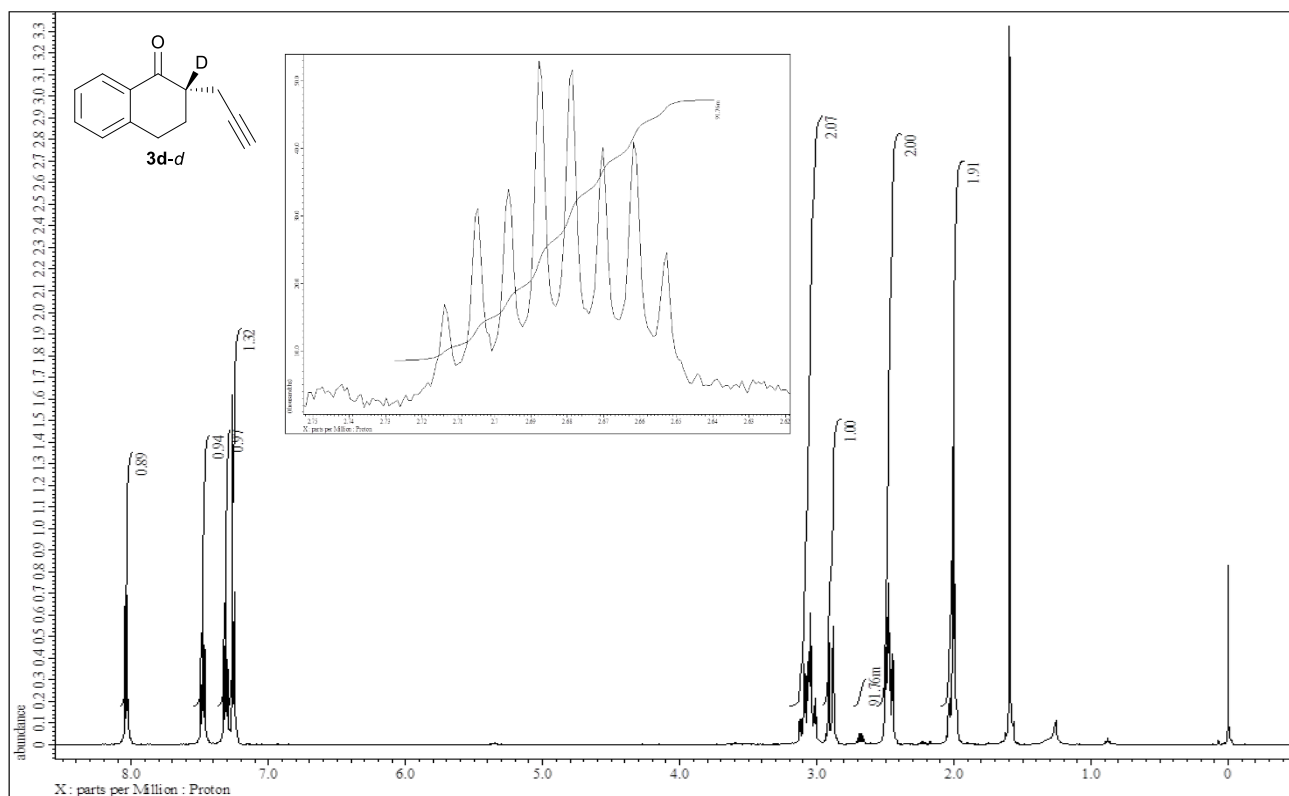

Supplementary figure 57.  $^1\text{H}$  NMR spectrum for **3d-d**

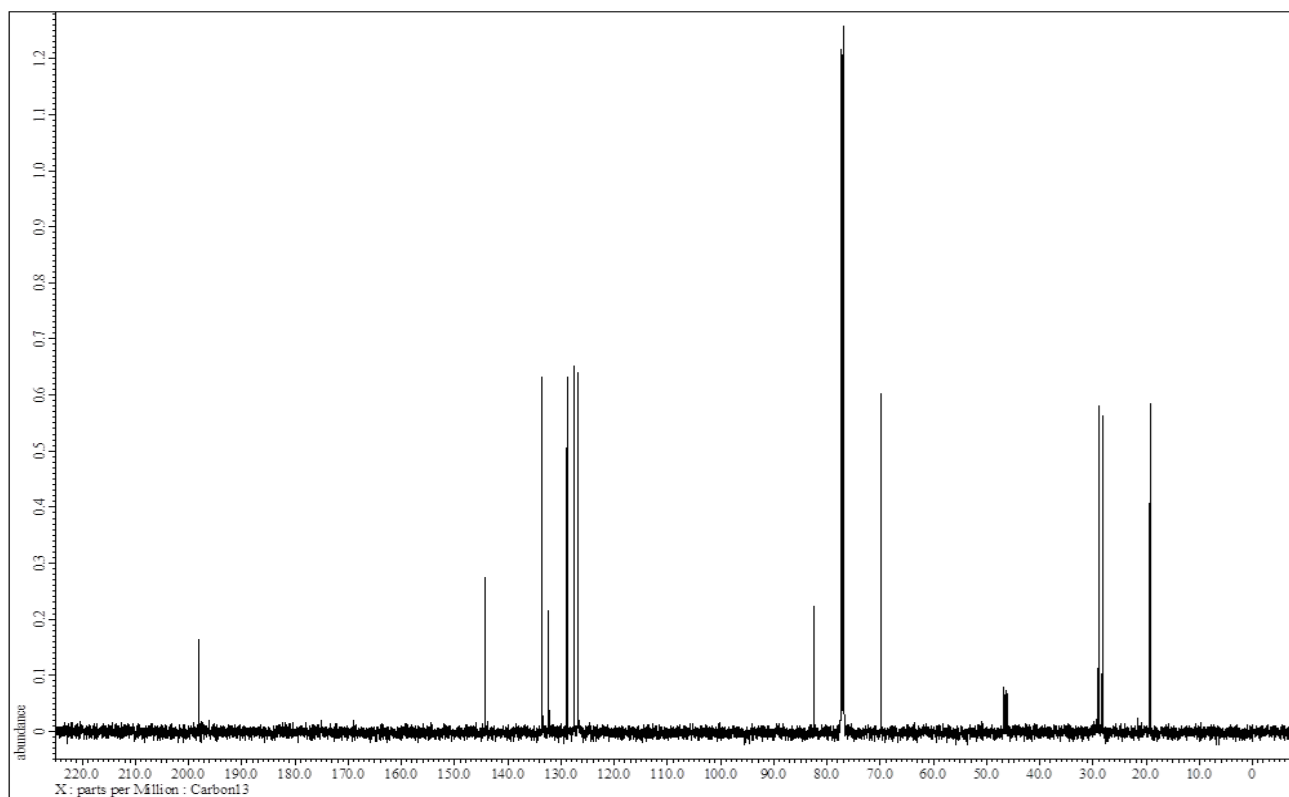

Supplementary figure 58.  $^{13}\text{C}$  NMR spectrum for **3d-d**



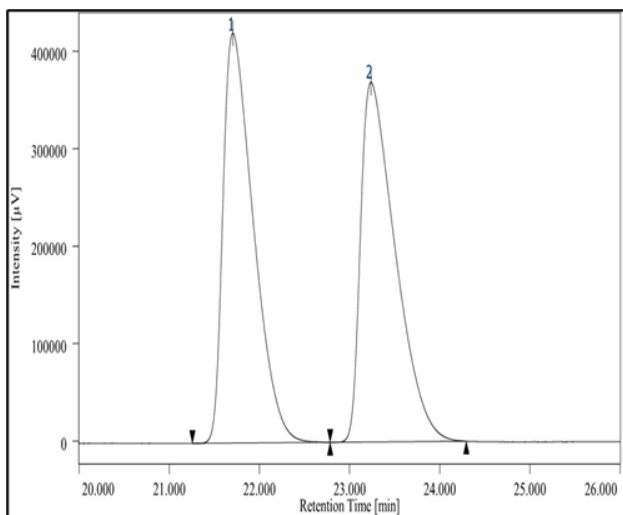

| Peak | Retention Time [min] | Area [%] |
|------|----------------------|----------|
| 1    | 21.705               | 49.952   |
| 2    | 23.235               | 50.048   |

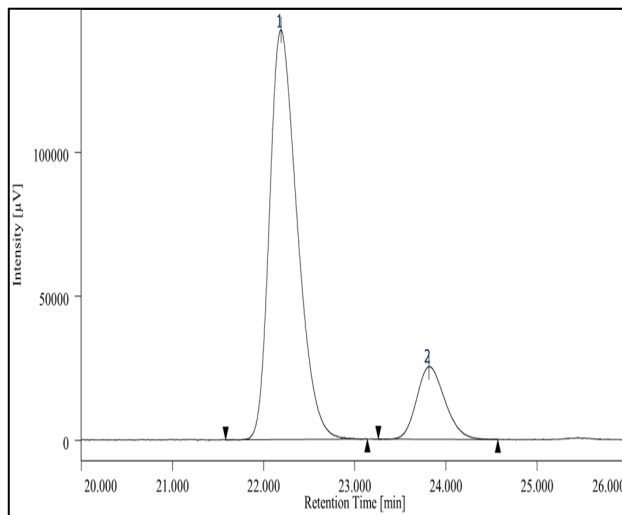

| Peak | Retention Time [min] | Area [%] |
|------|----------------------|----------|
| 1    | 22.192               | 84.632   |
| 2    | 23.813               | 15.368   |

Supplementary figure 59. HPLC spectra for 3d-d

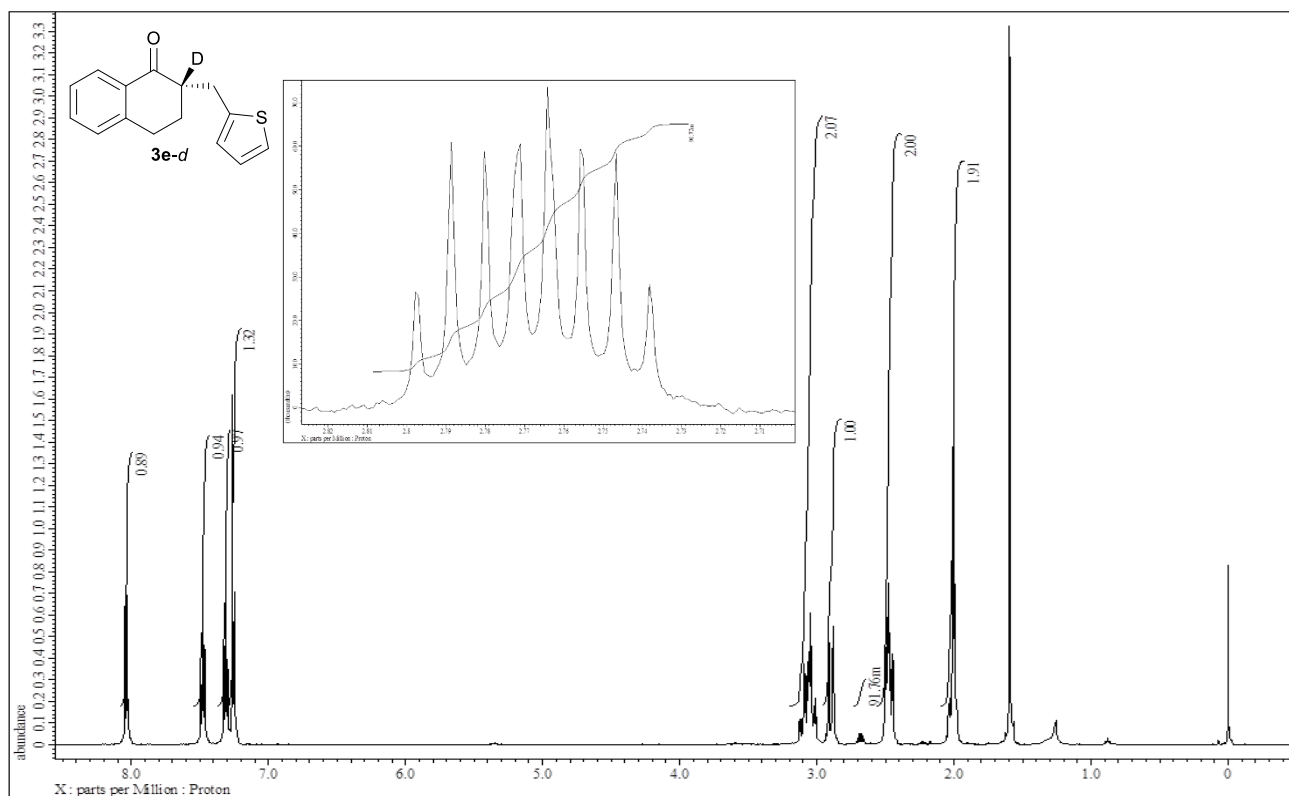

Supplementary figure 60.  $^1\text{H}$  NMR spectrum for **3e-d**

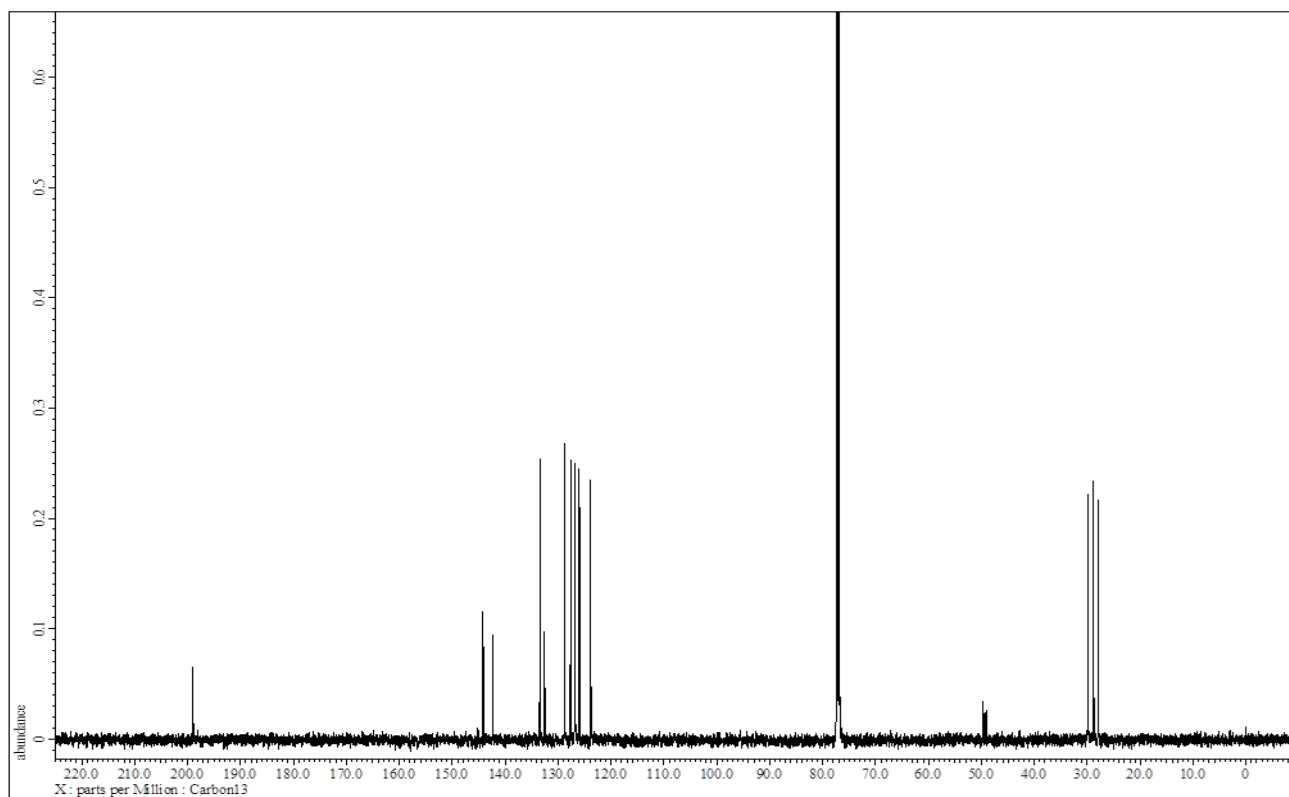

Supplementary figure 61.  $^{13}\text{C}$  NMR spectrum for **3e-d**

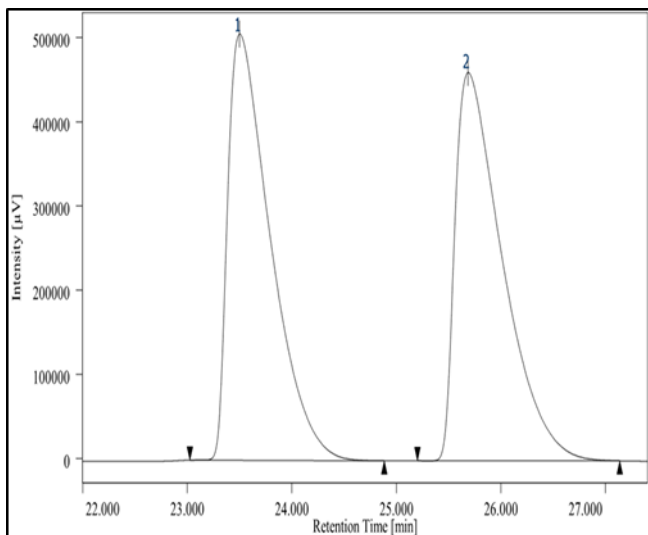

| Peak | Retention Time [min] | Area [%] |
|------|----------------------|----------|
| 1    | 23.500               | 49.801   |
| 2    | 25.683               | 50.199   |

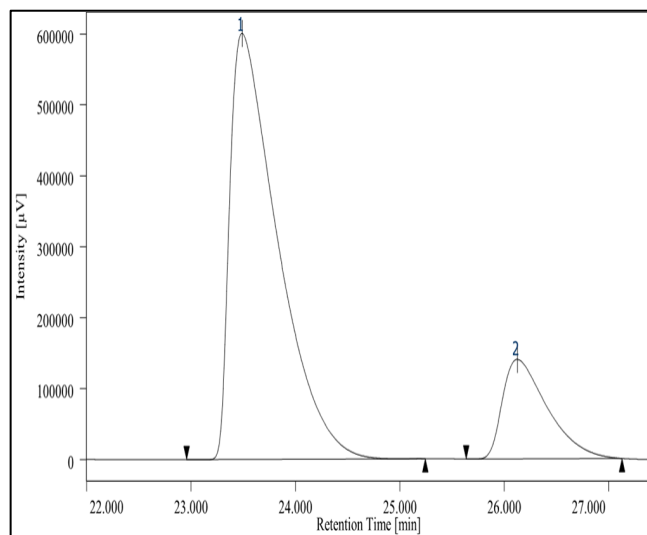

| Peak | Retention Time [min] | Area [%] |
|------|----------------------|----------|
| 1    | 23.492               | 82.053   |
| 2    | 26.125               | 17.947   |

Supplementary figure 62. HPLC spectra for **3e-d**

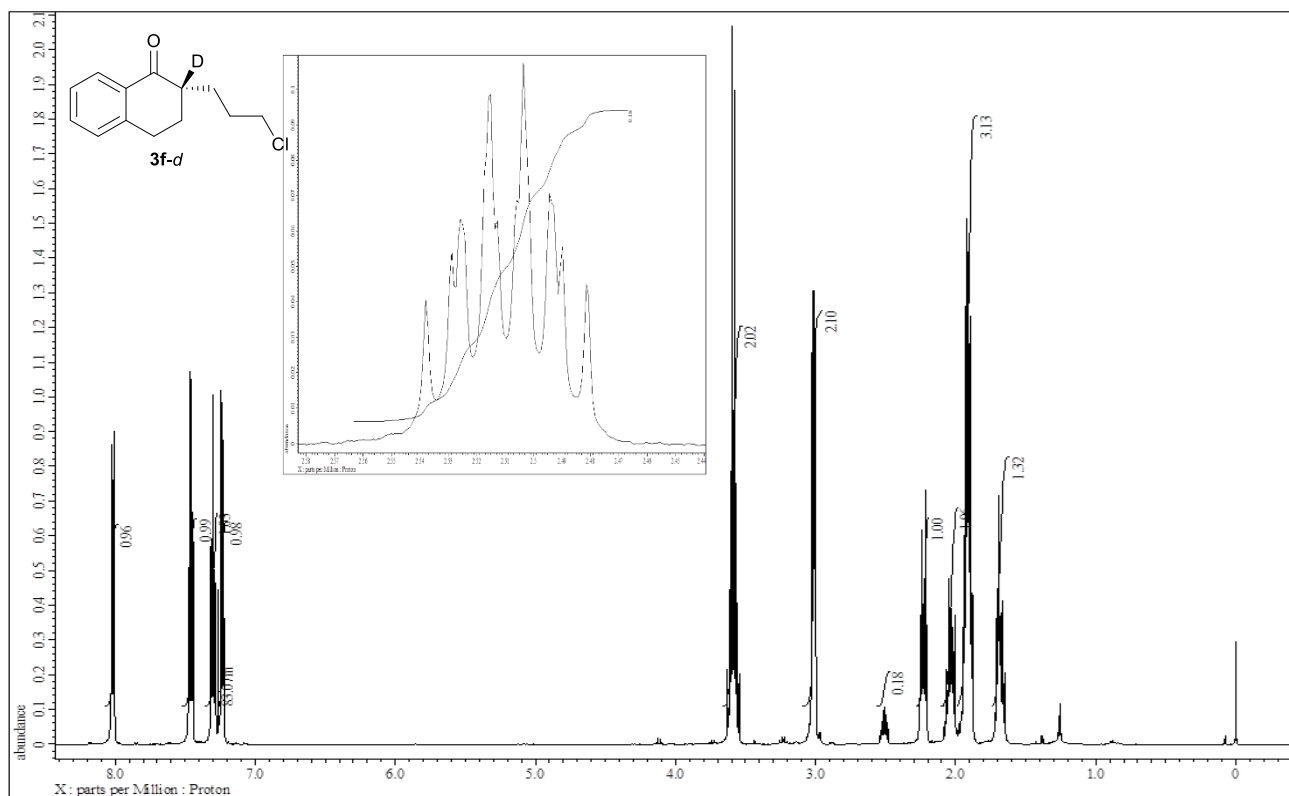

Supplementary figure 63.  $^1\text{H}$  NMR spectrum for **3f-d**

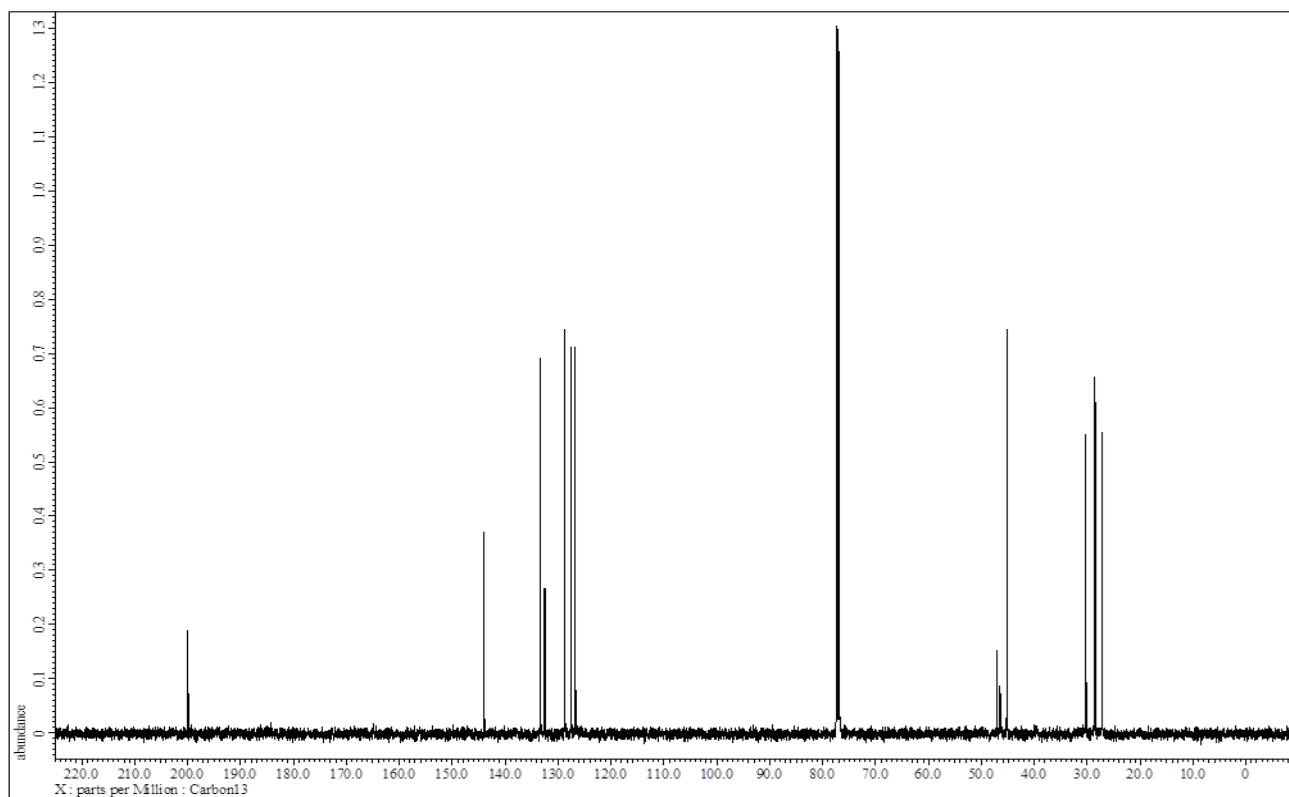

Supplementary figure 64.  $^{13}\text{C}$  NMR spectrum for **3f-d**



| Peak | Retention Time [min] | Area [%] |
|------|----------------------|----------|
| 1    | 36.852               | 49.485   |
| 2    | 39.325               | 50.515   |

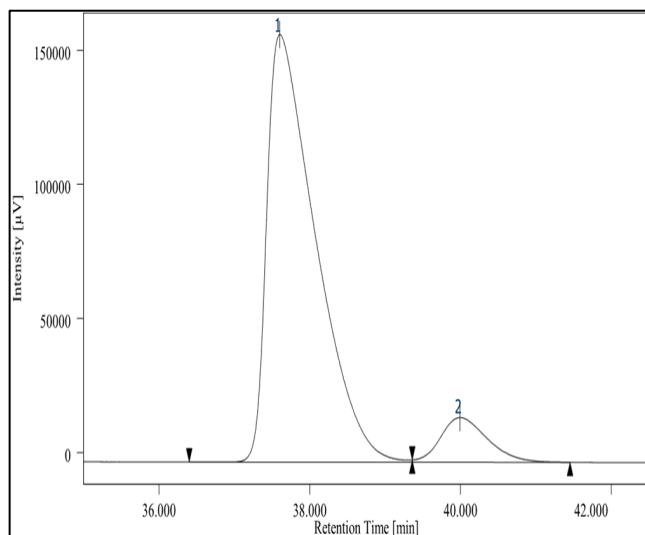

| Peak | Retention Time [min] | Area [%] |
|------|----------------------|----------|
| 1    | 37.600               | 90.854   |
| 2    | 39.992               | 9.146    |

Supplementary figure 65. HPLC spectra for **3f-d**

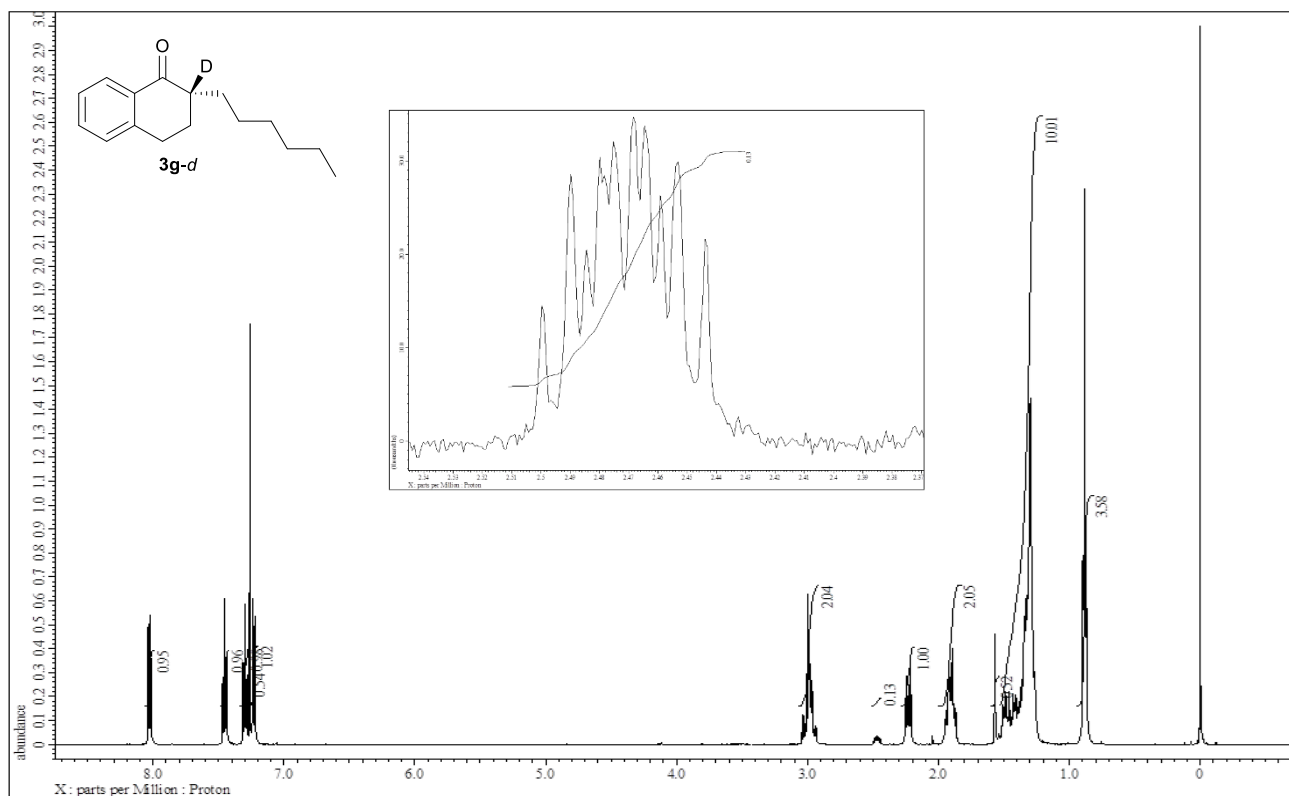

Supplementary figure 66.  $^1\text{H}$  NMR spectrum for **3g-d**

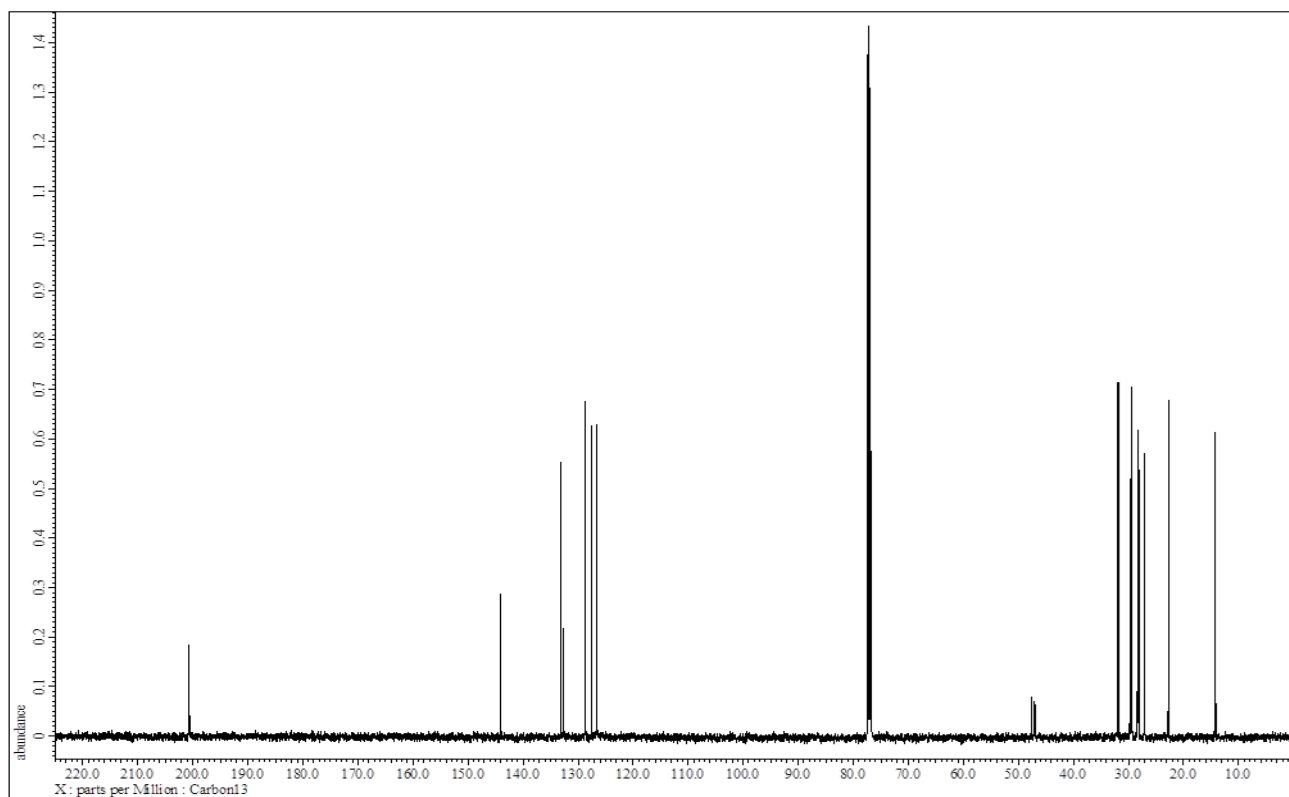

Supplementary figure 67.  $^{13}\text{C}$  NMR spectrum for **3g-d**

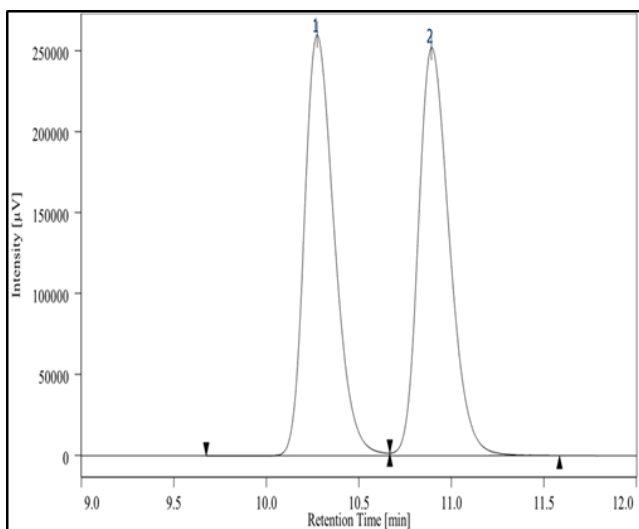

| Peak | Retention Time [min] | Area [%] |
|------|----------------------|----------|
| 1    | 10.275               | 49.866   |
| 2    | 10.892               | 50.134   |

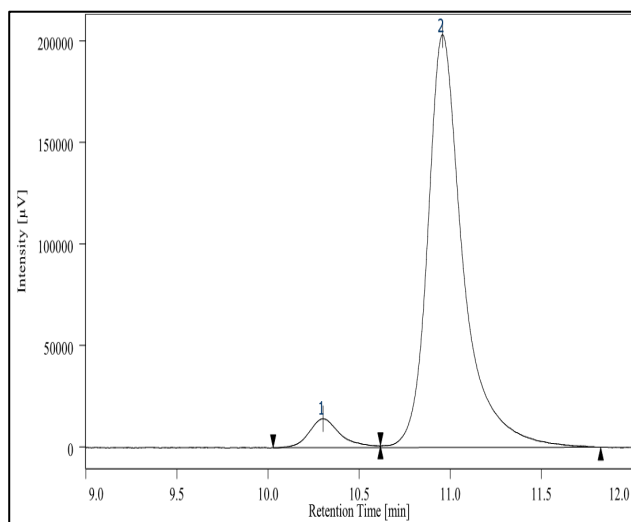

| Peak | Retention Time [min] | Area [%] |
|------|----------------------|----------|
| 1    | 10.302               | 5.879    |
| 2    | 10.957               | 94.121   |

Supplementary figure 68. HPLC spectra for **3g-d**

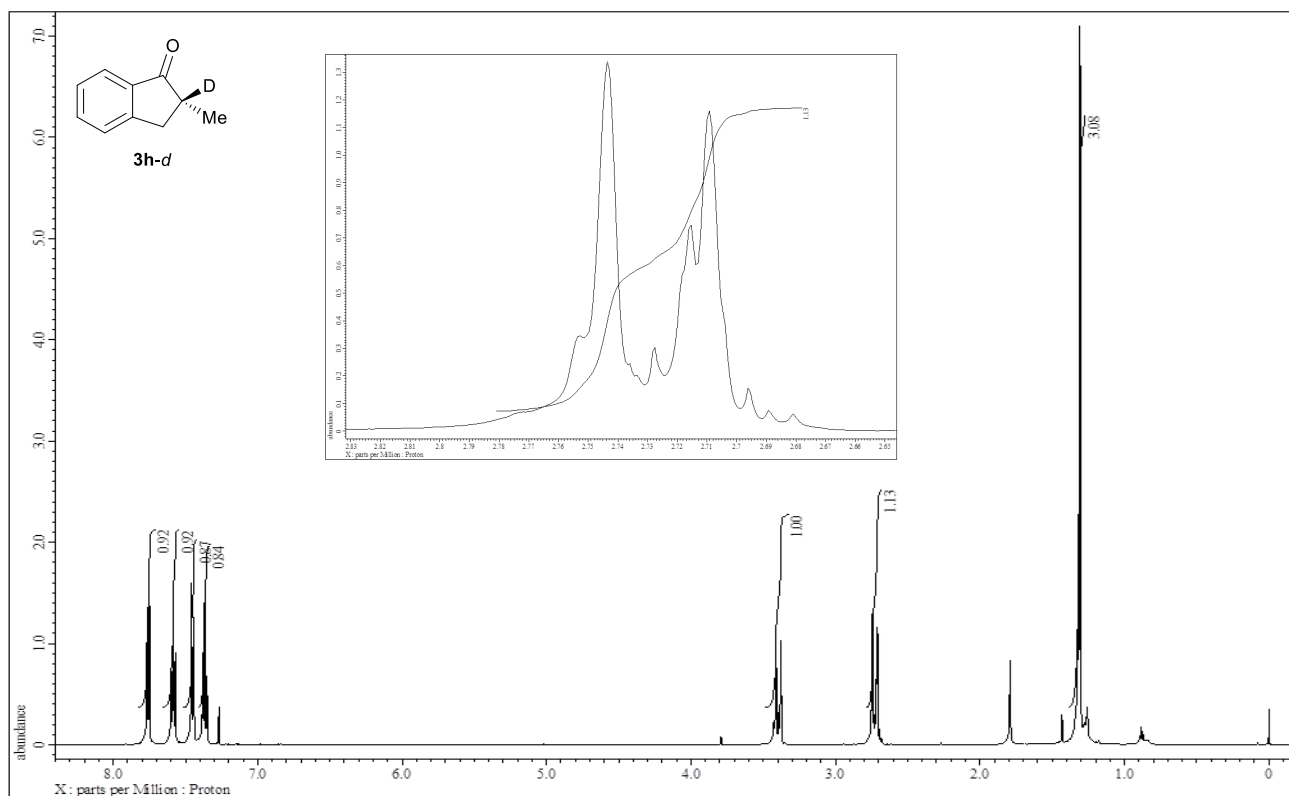

Supplementary figure 69.  $^1\text{H}$  NMR spectrum for **3h-d**

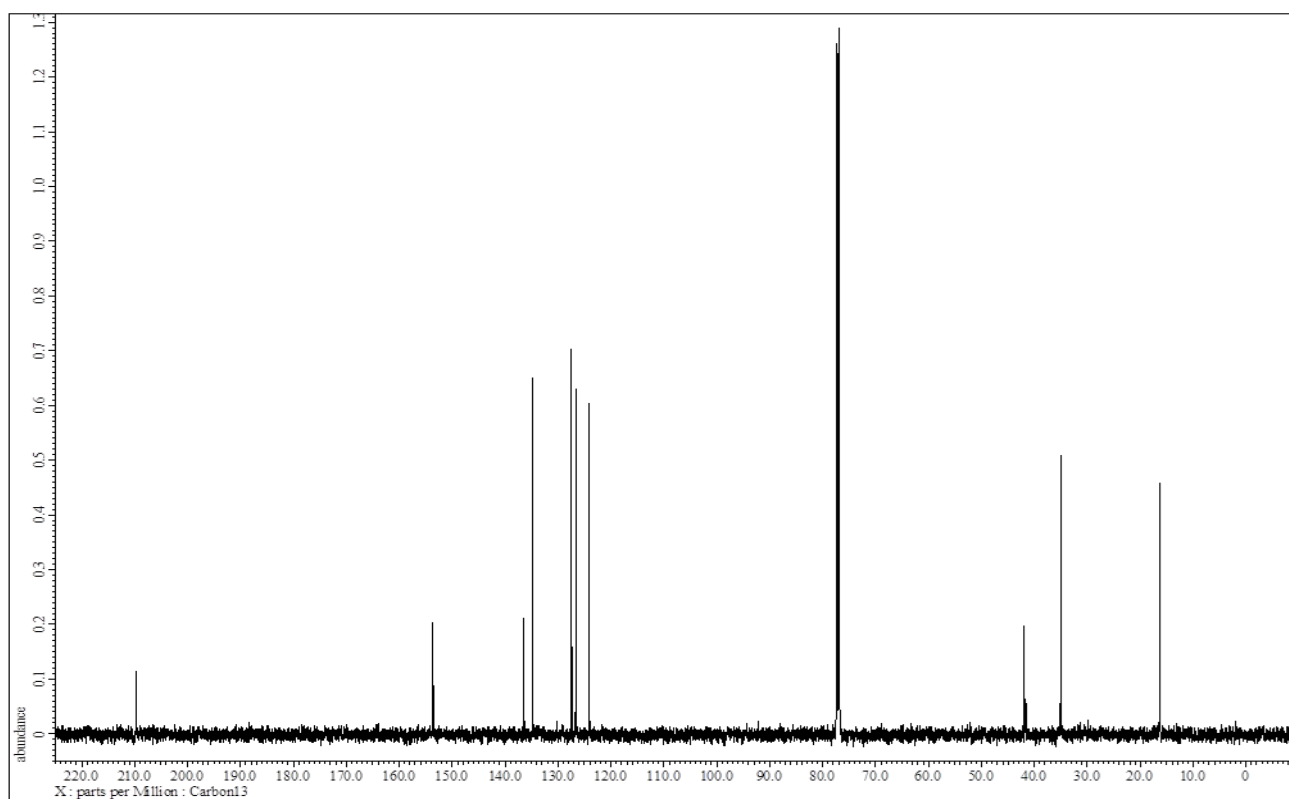

Supplementary figure 70.  $^{13}\text{C}$  NMR spectrum for **3h-d**



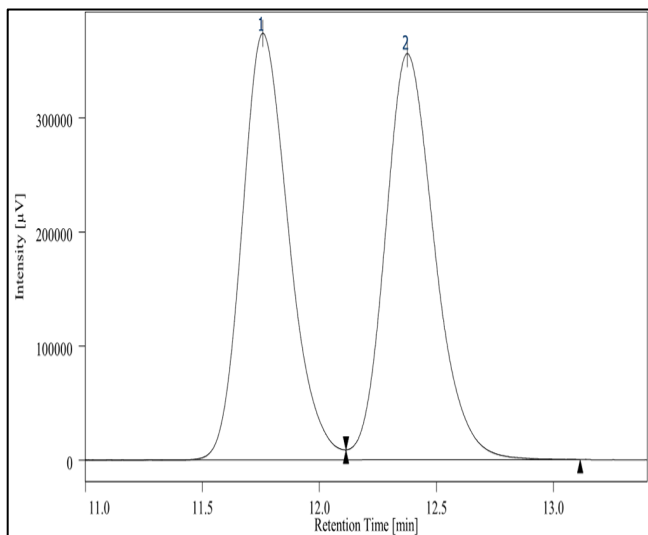

| Peak | Retention Time [min] | Area [%] |
|------|----------------------|----------|
| 1    | 11.758               | 49.794   |
| 2    | 12.375               | 50.206   |

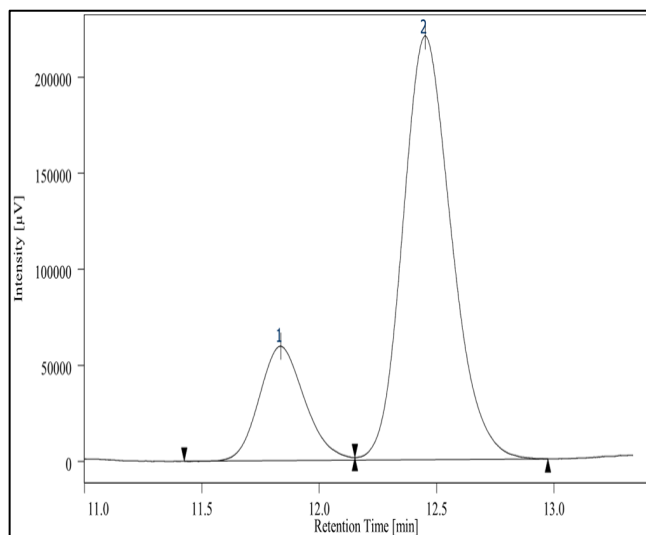

| Peak | Retention Time [min] | Area [%] |
|------|----------------------|----------|
| 1    | 11.837               | 20.061   |
| 2    | 12.452               | 79.939   |

Supplementary figure 71. HPLC spectra for **3h-d**

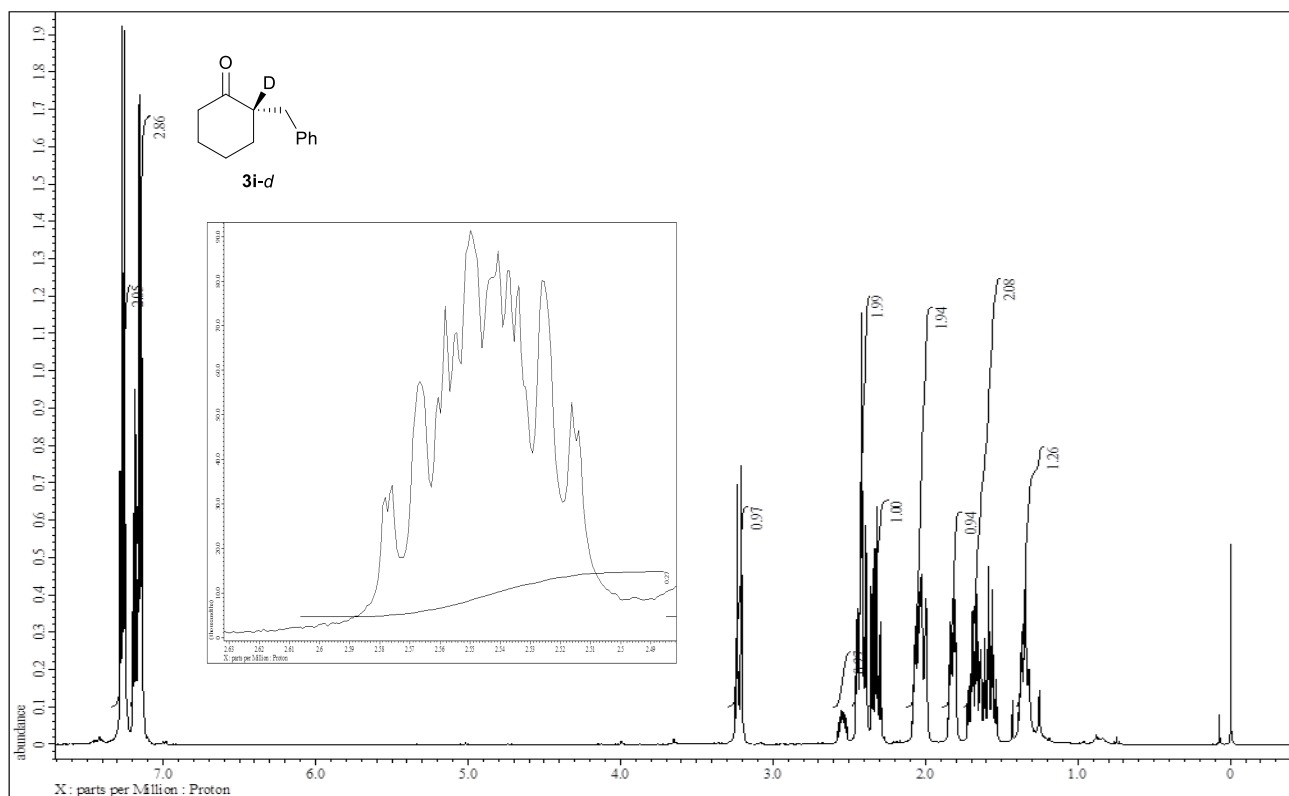

Supplementary figure 71. <sup>1</sup>H NMR spectrum for **3i-d**

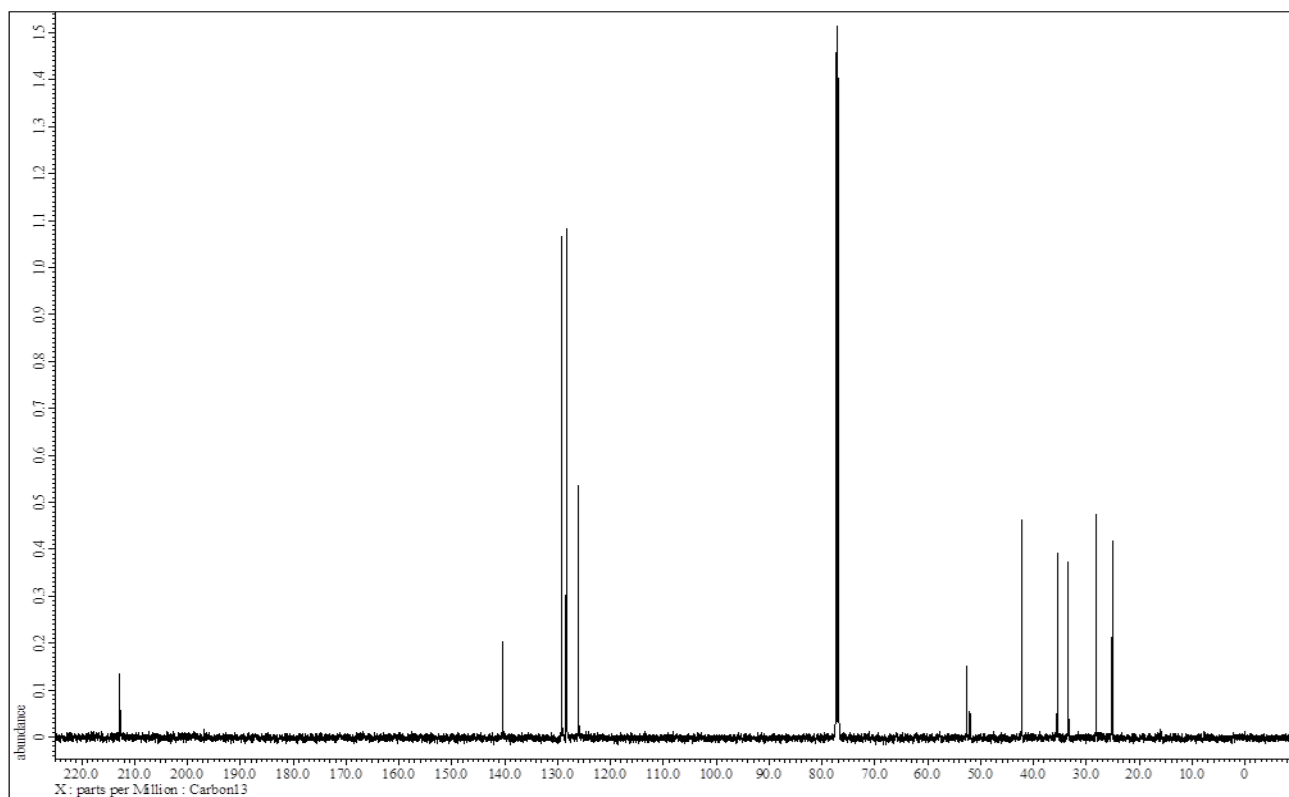

Supplementary figure 72. <sup>13</sup>C NMR spectrum for **3i-d**

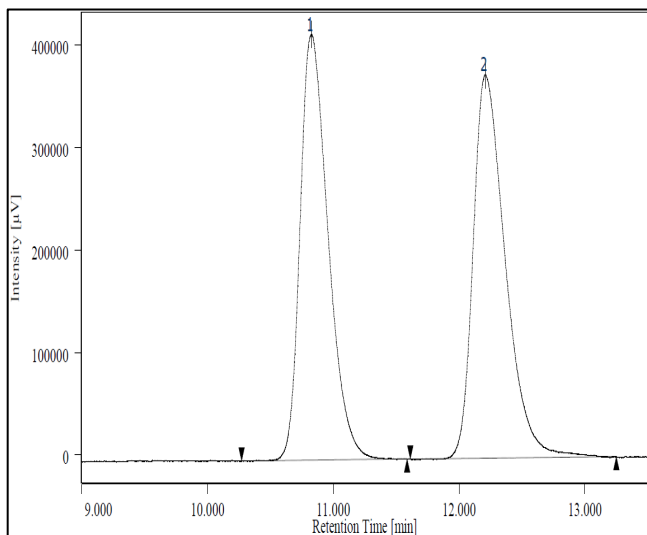

| Peak | Retention Time [min] | Area [%] |
|------|----------------------|----------|
| 1    | 10.828               | 49.130   |
| 2    | 12.210               | 50.870   |

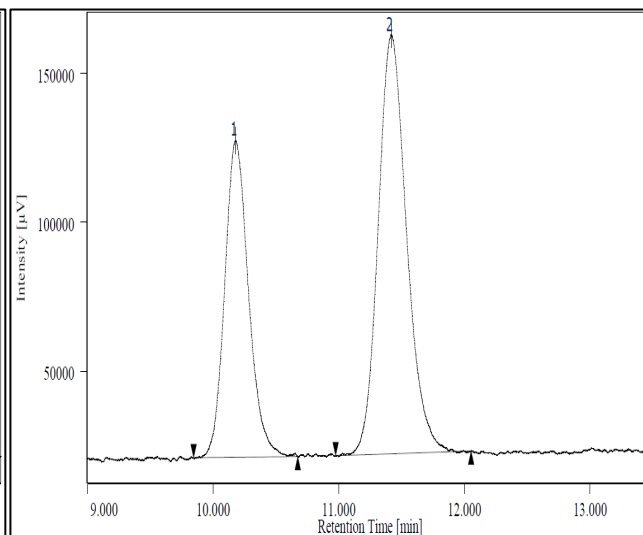

| Peak | Retention Time [min] | Area [%] |
|------|----------------------|----------|
| 1    | 10.180               | 38.787   |
| 2    | 11.417               | 61.213   |

Supplementary figure 73. HPLC spectra for 3i-d

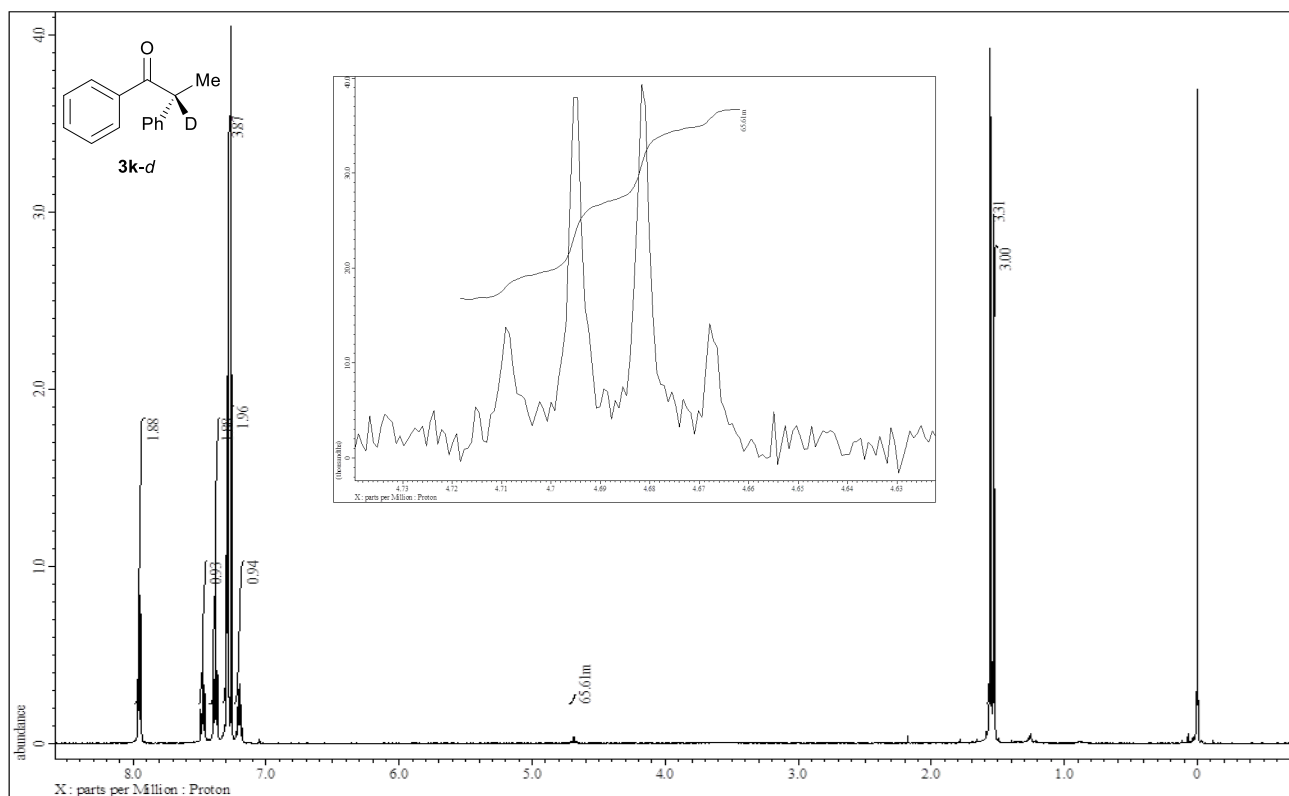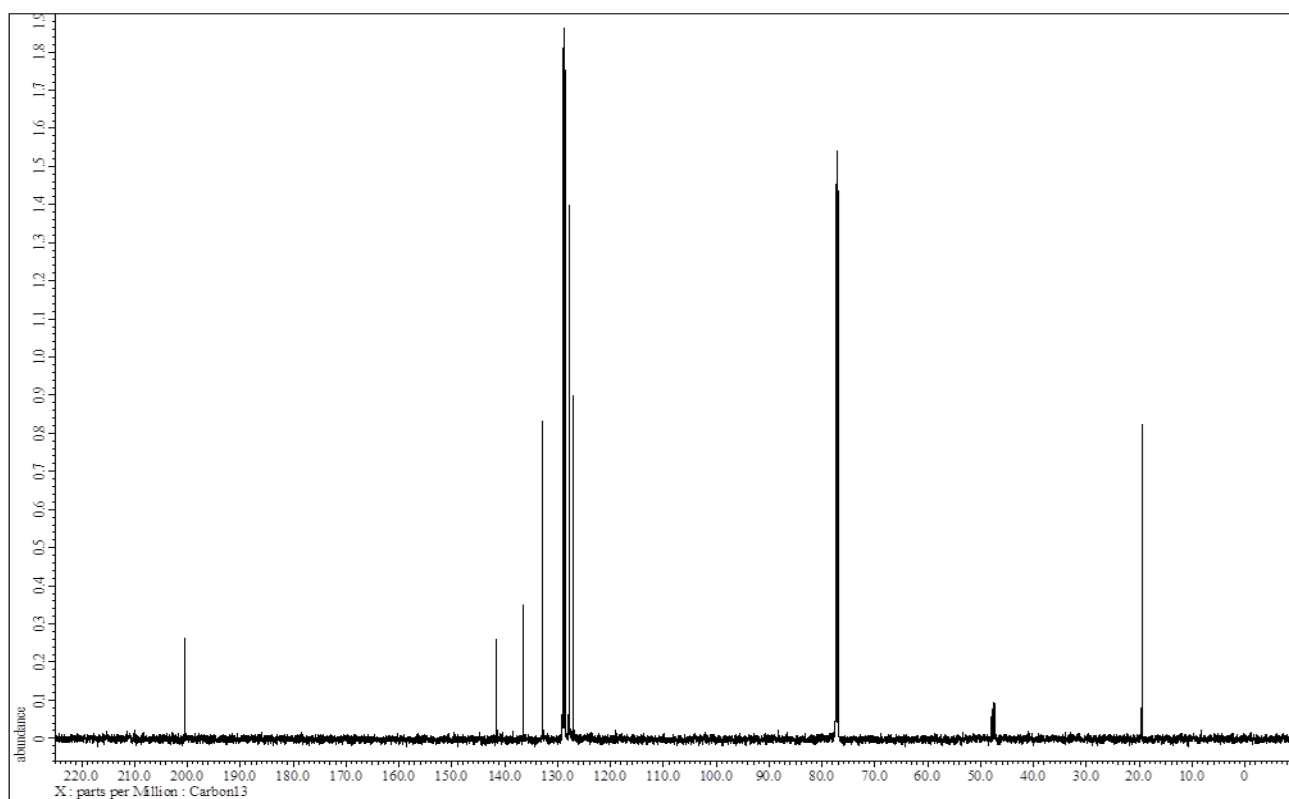



| Peak | Retention Time [min] | Area [%] |
|------|----------------------|----------|
| 1    | 20.162               | 49.945   |
| 2    | 23.490               | 50.055   |

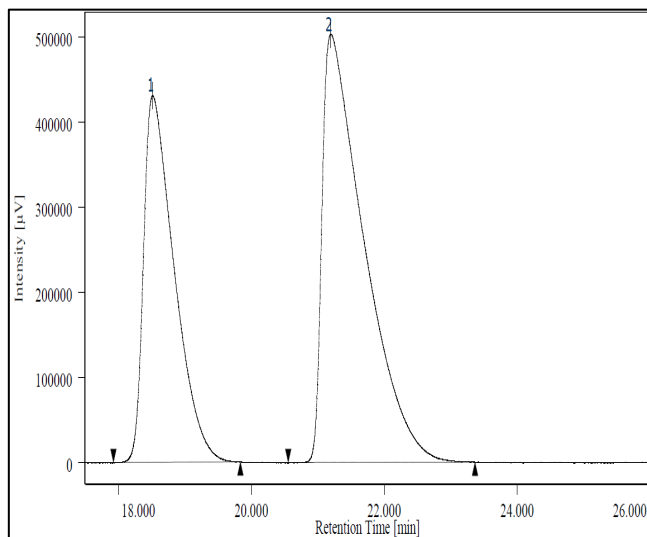

| Peak | Retention Time [min] | Area [%] |
|------|----------------------|----------|
| 1    | 18.515               | 38.577   |
| 2    | 21.195               | 61.423   |

Supplementary figure 76. HPLC spectra for **3k-d**
